# Supplementary material for: Preference of Small Molecules for Local Minimum Conformations when Binding to Proteins
Source: PubMed Central journal article supplement (PMC1959118; doi:10.1371/journal.pone.0000820), 2007-09-05
Supplement: pone.0000820.s001.pdf [file pone.0000820.s001.pdf]

Table S1. Root mean square deviations, rotational and vibrational frequencies, and gradients of local minimum conformations obtained from NMODE-monitored energy minimization of protein-bound ligand conformations taken from the 100 crystal structures using the conjugated gradient minimization method with a gradient cutoff of 0.06 kcal/(mol•Å). All three translational frequencies were zero and are not listed.

| PDB <sup>a</sup><br>code | RSMD <sup>b</sup><br>(Å) | 1 <sup>st</sup> rot. freq.<br>ilevel = 0 <sup>c</sup> | 2 <sup>nd</sup> rot. freq.<br>ilevel = 0 | 3 <sup>rd</sup> rot.<br>freq.<br>ilevel = 0 | 1 <sup>st</sup> vib. freq.<br>ilevel = 0 <sup>d</sup> | 1 <sup>st</sup> vib. freq.<br>ilevel = 1 <sup>e</sup> | Gradient <sup>f</sup><br>(kcal/mol•Å) |
|--------------------------|--------------------------|-------------------------------------------------------|------------------------------------------|---------------------------------------------|-------------------------------------------------------|-------------------------------------------------------|---------------------------------------|
| 13GS                     | 0.54                     | 0.77                                                  | 2.41                                     | 3.88                                        | 7.11                                                  | 7.06                                                  | 5.73E-02                              |
| 1A42                     | 0.69                     | 0.00                                                  | 0.00                                     | 3.14                                        | 13.24                                                 | 13.24                                                 | 5.62E-02                              |
| 1A4K                     | 0.36                     | 0.00                                                  | 2.14                                     | 2.76                                        | 14.27                                                 | 14.27                                                 | 5.56E-02                              |
| 1A8T                     | 0.88                     | 0.00                                                  | 0.00                                     | 1.61                                        | 3.01                                                  | 0.00                                                  | 5.83E-02                              |
| 1AFQ                     | 0.38                     | 0.00                                                  | 0.00                                     | 0.27                                        | 5.43                                                  | 5.28                                                  | 5.99E-02                              |
| 1AOE                     | 0.11                     | 0.00                                                  | 2.14                                     | 3.40                                        | 21.66                                                 | 21.66                                                 | 5.79E-02                              |
| 1ATL                     | 0.61                     | 0.00                                                  | 0.00                                     | 2.28                                        | 5.94                                                  | 5.38                                                  | 5.98E-02                              |
| 1AZM                     | 0.42                     | 0.00                                                  | 1.00                                     | 2.05                                        | 18.76                                                 | 18.75                                                 | 5.70E-02                              |
| 1BNW                     | 0.96                     | 0.00                                                  | 1.00                                     | 1.31                                        | 6.59                                                  | 6.58                                                  | 5.19E-02                              |
| 1BQO                     | 0.74                     | 0.00                                                  | 0.00                                     | 1.19                                        | 1.81                                                  | 0.00                                                  | 5.93E-02                              |
| 1BR6                     | 0.30                     | 0.00                                                  | 0.00                                     | 2.73                                        | 10.10                                                 | 10.08                                                 | 5.93E-02                              |
| 1CET                     | 0.25                     | 0.00                                                  | 0.00                                     | 3.10                                        | 8.29                                                  | 8.08                                                  | 5.93E-02                              |
| 1CIM                     | 0.39                     | 0.00                                                  | 1.22                                     | 3.01                                        | 23.41                                                 | 23.40                                                 | 5.91E-02                              |
| 1D3P                     | 0.50                     | 0.00                                                  | 0.00                                     | 0.56                                        | 2.46                                                  | 0.00                                                  | 5.30E-02                              |
| 1D4P                     | 0.93                     | 0.00                                                  | 0.00                                     | 2.87                                        | 12.00                                                 | 12.00                                                 | 5.98E-02                              |
| 1D6V                     | 0.59                     | 0.00                                                  | 0.00                                     | 3.48                                        | 12.36                                                 | 12.35                                                 | 5.77E-02                              |
| 1DIB                     | 0.41                     | 0.00                                                  | 0.00                                     | 1.09                                        | 11.76                                                 | 11.76                                                 | 5.89E-02                              |
| 1DLR                     | 0.26                     | 0.00                                                  | 0.00                                     | 0.00                                        | 3.81                                                  | 0.00                                                  | 5.56E-02                              |
| 1EFY                     | 0.35                     | 0.00                                                  | 0.00                                     | 1.53                                        | 33.61                                                 | 33.61                                                 | 5.74E-02                              |
| 1ELA                     | 0.97                     | 0.00                                                  | 0.00                                     | 1.80                                        | 9.48                                                  | 9.48                                                  | 5.83E-02                              |
| 1ETR                     | 0.24                     | 0.00                                                  | 0.00                                     | 3.00                                        | 9.18                                                  | 9.12                                                  | 5.93E-02                              |
| 1ETT                     | 0.35                     | 0.00                                                  | 0.00                                     | 0.00                                        | 0.93                                                  | 0.00                                                  | 4.62E-02                              |
| 1EVE                     | 0.40                     | 0.00                                                  | 1.57                                     | 2.06                                        | 10.22                                                 | 10.09                                                 | 5.88E-02                              |
| 1EXA                     | 0.13                     | 0.42                                                  | 1.37                                     | 2.73                                        | 6.11                                                  | 6.05                                                  | 5.62E-02                              |
| 1EZQ                     | 0.62                     | 0.00                                                  | 0.00                                     | 2.51                                        | 5.03                                                  | 4.88                                                  | 5.99E-02                              |
| 1F0R                     | 0.43                     | 0.00                                                  | 0.00                                     | 1.08                                        | 2.41                                                  | 0.00                                                  | 5.98E-02                              |
| 1F0T                     | 0.28                     | 0.00                                                  | 1.35                                     | 2.39                                        | 3.08                                                  | 0.00                                                  | 6.00E-02                              |
| 1F4E                     | 0.56                     | 0.00                                                  | 1.35                                     | 1.75                                        | 13.56                                                 | 12.86                                                 | 2.37E-02                              |
| 1F4F                     | 0.56                     | 0.00                                                  | 0.55                                     | 0.91                                        | 2.23                                                  | 0.00                                                  | 5.55E-02                              |
| 1F4G                     | 0.76                     | 0.00                                                  | 0.00                                     | 0.00                                        | 2.76                                                  | 0.00                                                  | 5.98E-02                              |
| 1FCX                     | 0.20                     | 0.00                                                  | 2.16                                     | 2.54                                        | 3.68                                                  | 0.00                                                  | 5.99E-02                              |
| 1FCZ                     | 0.25                     | 0.00                                                  | 0.00                                     | 3.40                                        | 24.65                                                 | 24.64                                                 | 5.99E-02                              |
| 1FJS                     | 0.58                     | 0.00                                                  | 0.00                                     | 0.00                                        | 1.74                                                  | 0.00                                                  | 5.96E-02                              |
| 1FKG                     | 0.87                     | 0.00                                                  | 0.00                                     | 2.68                                        | 4.15                                                  | 3.81                                                  | 6.00E-02                              |
| 1FM6                     | 0.23                     | 0.00                                                  | 0.00                                     | 0.00                                        | 7.69                                                  | 7.68                                                  | 5.92E-02                              |
| 1FM9                     | 0.36                     | 0.00                                                  | 0.00                                     | 0.00                                        | 1.18                                                  | 0.00                                                  | 3.63E-02                              |
| 1FRB                     | 0.50                     | 0.00                                                  | 0.00                                     | 0.00                                        | 0.92                                                  | 0.00                                                  | 5.70E-02                              |
| 1G4O                     | 0.42                     | 0.55                                                  | 1.78                                     | 3.31                                        | 14.84                                                 | 14.83                                                 | 5.97E-02                              |
| 1GWX                     | 0.62                     | 0.00                                                  | 1.68                                     | 2.74                                        | 3.30                                                  | 2.58                                                  | 5.96E-02                              |
| 1H1P                     | 0.32                     | 0.00                                                  | 0.00                                     | 0.90                                        | 1.76                                                  | 0.00                                                  | 3.87E-02                              |
| 1H1S                     | 0.50                     | 0.00                                                  | 0.00                                     | 2.39                                        | 12.31                                                 | 12.30                                                 | 5.74E-02                              |
| 1H9U                     | 0.13                     | 0.00                                                  | 0.00                                     | 3.14                                        | 20.72                                                 | 20.72                                                 | 5.75E-02                              |
| 1HDQ                     | 0.35                     | 0.00                                                  | 2.57                                     | 2.81                                        | 24.53                                                 | 24.53                                                 | 4.57E-02                              |
| 1HFC                     | 0.23                     | 0.00                                                  | 0.27                                     | 3.25                                        | 12.33                                                 | 12.32                                                 | 5.64E-02                              |
| 1HPV                     | 0.65                     | 0.00                                                  | 0.00                                     | 0.00                                        | 2.21                                                  | 0.00                                                  | 5.94E-02                              |
| 1HTF                     | 0.47                     | 0.00                                                  | 0.32                                     | 1.73                                        | 2.20                                                  | 0.00                                                  | 5.98E-02                              |
| 1I7Z                     | 0.25                     | 0.00                                                  | 0.00                                     | 2.90                                        | 21.82                                                 | 21.78                                                 | 5.78E-02                              |
| 1I8Z                     | 0.64                     | 0.00                                                  | 0.37                                     | 2.44                                        | 10.82                                                 | 10.78                                                 | 5.91E-02                              |
| 1IF7                     | 0.58                     | 0.00                                                  | 1.21                                     | 2.42                                        | 12.27                                                 | 12.19                                                 | 5.73E-02                              |
| 1IY7                     | 0.31                     | 1.14                                                  | 1.62                                     | 2.43                                        | 21.45                                                 | 21.45                                                 | 4.79E-02                              |

|      |      |      |      |      |       |       |          |
|------|------|------|------|------|-------|-------|----------|
| 1JSV | 0.22 | 0.97 | 2.13 | 2.35 | 20.25 | 20.23 | 5.57E-02 |
| 1K1J | 0.23 | 0.00 | 0.00 | 2.72 | 8.90  | 8.85  | 5.96E-02 |
| 1K22 | 0.50 | 0.00 | 0.00 | 0.45 | 2.61  | 0.00  | 5.87E-02 |
| 1K7E | 0.40 | 0.00 | 0.00 | 2.11 | 4.80  | 4.17  | 4.95E-02 |
| 1K7F | 0.40 | 0.85 | 2.86 | 3.37 | 13.43 | 13.39 | 5.58E-02 |
| 1KV1 | 0.27 | 0.00 | 0.11 | 1.85 | 9.41  | 9.39  | 5.88E-02 |
| 1KV2 | 0.50 | 0.00 | 0.00 | 0.00 | 0.92  | 0.00  | 5.83E-02 |
| 1L2S | 0.51 | 0.71 | 2.21 | 2.60 | 17.49 | 17.48 | 5.79E-02 |
| 1L8G | 0.40 | 0.00 | 2.13 | 2.29 | 9.92  | 9.92  | 5.90E-02 |
| 1LQD | 0.47 | 0.00 | 0.00 | 0.00 | 0.67  | 0.00  | 3.91E-02 |
| 1M48 | 0.14 | 0.00 | 0.00 | 1.51 | 3.00  | 0.00  | 4.93E-02 |
| 1MMB | 0.46 | 0.00 | 1.30 | 2.33 | 7.59  | 7.57  | 5.97E-02 |
| 1MNC | 0.28 | 0.00 | 0.82 | 2.91 | 10.76 | 10.73 | 5.88E-02 |
| 1MQ5 | 0.41 | 0.00 | 1.98 | 2.36 | 8.00  | 7.94  | 5.98E-02 |
| 1MQ6 | 0.36 | 0.00 | 0.00 | 0.33 | 1.13  | 0.00  | 5.99E-02 |
| 1NHU | 0.57 | 0.00 | 0.00 | 1.83 | 3.28  | 0.00  | 6.00E-02 |
| 1NHV | 0.61 | 0.00 | 0.21 | 0.63 | 5.78  | 5.36  | 5.94E-02 |
| 1O86 | 0.52 | 0.00 | 1.14 | 2.46 | 11.91 | 11.90 | 5.69E-02 |
| 1OHR | 0.55 | 0.00 | 1.47 | 2.54 | 10.15 | 10.13 | 5.73E-02 |
| 1PPC | 0.30 | 0.00 | 0.00 | 2.00 | 6.57  | 6.47  | 5.60E-02 |
| 1PPH | 0.42 | 0.00 | 0.00 | 0.00 | 8.02  | 8.00  | 3.34E-02 |
| 1QBU | 0.79 | 0.00 | 1.65 | 2.19 | 5.41  | 5.35  | 5.98E-02 |
| 1QHI | 0.23 | 0.00 | 0.00 | 1.30 | 13.74 | 13.72 | 5.99E-02 |
| 1QL9 | 0.31 | 0.00 | 0.00 | 2.18 | 2.99  | 0.00  | 5.96E-02 |
| 1QPE | 0.28 | 0.00 | 0.00 | 1.42 | 28.20 | 28.19 | 5.42E-02 |
| 1R09 | 0.47 | 0.00 | 0.00 | 0.00 | 2.17  | 0.00  | 5.65E-02 |
| 1SYN | 0.67 | 0.00 | 1.56 | 1.93 | 2.77  | 0.00  | 5.94E-02 |
| 1THL | 0.29 | 1.45 | 2.05 | 2.86 | 5.90  | 5.83  | 5.91E-02 |
| 1UVS | 0.65 | 0.00 | 0.00 | 1.08 | 2.80  | 0.00  | 5.92E-02 |
| 1UVT | 0.43 | 0.00 | 0.00 | 0.00 | 1.90  | 0.00  | 5.00E-02 |
| 1YDR | 0.28 | 0.89 | 2.17 | 3.16 | 11.22 | 11.19 | 5.92E-02 |
| 1YDS | 0.33 | 0.00 | 2.69 | 3.34 | 19.51 | 19.50 | 5.70E-02 |
| 1YDT | 0.41 | 0.00 | 0.00 | 0.00 | 1.33  | 0.00  | 3.40E-02 |
| 2CGR | 0.46 | 0.00 | 0.00 | 0.00 | 1.99  | 0.00  | 5.57E-02 |
| 2CSN | 0.67 | 0.00 | 0.00 | 3.09 | 3.50  | 0.00  | 5.62E-02 |
| 2PCP | 0.20 | 0.00 | 1.34 | 2.67 | 37.18 | 37.18 | 5.83E-02 |
| 2QWI | 0.39 | 0.00 | 0.00 | 1.90 | 23.23 | 23.22 | 5.93E-02 |
| 3CPA | 0.31 | 0.00 | 1.49 | 3.45 | 15.26 | 15.17 | 5.94E-02 |
| 3ERK | 0.31 | 0.00 | 0.00 | 0.00 | 1.69  | 0.00  | 5.99E-02 |
| 3ERT | 0.26 | 1.83 | 2.37 | 2.91 | 16.17 | 16.16 | 5.97E-02 |
| 3STD | 0.29 | 0.00 | 0.00 | 4.08 | 4.52  | 0.00  | 5.84E-02 |
| 3TMN | 0.22 | 0.00 | 0.00 | 2.76 | 10.51 | 10.44 | 5.95E-02 |
| 4DFR | 0.36 | 0.00 | 0.00 | 1.32 | 2.97  | 0.00  | 5.93E-02 |
| 4STD | 0.14 | 0.00 | 0.00 | 0.00 | 13.37 | 13.36 | 5.91E-02 |
| 5STD | 0.19 | 0.00 | 0.81 | 2.34 | 4.74  | 3.06  | 4.20E-02 |
| 5TLN | 0.77 | 0.00 | 1.24 | 2.25 | 7.97  | 7.93  | 6.00E-02 |
| 7DFR | 0.82 | 0.00 | 0.00 | 0.00 | 5.04  | 0.00  | 5.99E-02 |
| 7EST | 0.41 | 0.00 | 0.00 | 0.00 | 1.30  | 0.00  | 4.04E-02 |
| 830C | 0.53 | 0.00 | 0.00 | 1.69 | 2.49  | 0.00  | 5.99E-02 |
| 966C | 0.47 | 0.00 | 0.00 | 1.54 | 12.15 | 12.13 | 5.98E-02 |

- a: PDB: Protein Data Bank  
b: RMSD of all ligand atoms between minimized and initial conformations.  
c: First rotational frequency ( $\text{cm}^{-1}$ ) computed with the second derivative matrix not adjusted to put rotation and translation vectors to a high frequency (ilevel = 0).  
d: First vibrational frequency ( $\text{cm}^{-1}$ ) computed with the second derivative matrix not adjusted to put rotation and translation vectors to a high frequency (ilevel = 0).  
e: First vibrational frequency ( $\text{cm}^{-1}$ ) computed with the second derivative matrix adjusted to put rotation and translation vectors to a high frequency (ilevel = 1).  
f: Root mean square gradient.
