# Supplementary material for: Preference of Small Molecules for Local Minimum Conformations when Binding to Proteins
Source: PubMed Central journal article supplement (PMC1959118; doi:10.1371/journal.pone.0000820), 2007-09-05
Supplement: pone.0000820.s002.pdf [file pone.0000820.s002.pdf]

Table S2. Root mean square deviations, rotational and vibrational frequencies, and gradients of local minimum conformations obtained from NMODE-monitored energy minimization of protein-bound ligand conformations taken from the 100 crystal structures using the steepest descent minimization method with a gradient cutoff of 0.06 kcal/(mol•Å). All three translational frequencies were zero and are not listed.

| PDB <sup>a</sup><br>code | RSMD <sup>b</sup><br>(Å) | 1 <sup>st</sup> rot. freq.<br>ilevel = 0 <sup>c</sup> | 2 <sup>nd</sup> rot. freq.<br>ilevel = 0 | 3 <sup>rd</sup> rot.<br>freq.<br>ilevel = 0 | 1 <sup>st</sup> vib. freq.<br>ilevel = 0 <sup>d</sup> | 1 <sup>st</sup> vib. freq.<br>ilevel = 1 <sup>e</sup> | Gradient <sup>f</sup><br>(kcal/mol•Å) |
|--------------------------|--------------------------|-------------------------------------------------------|------------------------------------------|---------------------------------------------|-------------------------------------------------------|-------------------------------------------------------|---------------------------------------|
| 13GS                     | 0.51                     | 0.00                                                  | 2.62                                     | 3.81                                        | 5.90                                                  | 5.76                                                  | 5.97E-02                              |
| 1A42                     | 0.54                     | 0.00                                                  | 0.00                                     | 3.08                                        | 13.37                                                 | 13.35                                                 | 5.82E-02                              |
| 1A4K                     | 0.32                     | 0.00                                                  | 2.02                                     | 2.63                                        | 14.46                                                 | 14.46                                                 | 5.84E-02                              |
| 1A8T                     | 0.85                     | 0.00                                                  | 0.00                                     | 0.39                                        | 3.00                                                  | 0.00                                                  | 5.95E-02                              |
| 1AFQ                     | 0.30                     | 0.00                                                  | 0.00                                     | 2.89                                        | 5.11                                                  | 4.75                                                  | 5.97E-02                              |
| 1AOE                     | 0.10                     | 0.00                                                  | 0.00                                     | 2.94                                        | 21.88                                                 | 21.87                                                 | 5.31E-02                              |
| 1ATL                     | 0.62                     | 0.00                                                  | 0.00                                     | 3.49                                        | 6.80                                                  | 6.33                                                  | 5.99E-02                              |
| 1AZM                     | 0.36                     | 0.00                                                  | 0.84                                     | 2.24                                        | 18.43                                                 | 18.42                                                 | 5.82E-02                              |
| 1BNW                     | 0.90                     | 0.00                                                  | 0.00                                     | 0.00                                        | 7.68                                                  | 7.54                                                  | 5.75E-02                              |
| 1BQO                     | 0.58                     | 0.00                                                  | 0.00                                     | 1.85                                        | 2.71                                                  | 0.00                                                  | 5.95E-02                              |
| 1BR6                     | 0.25                     | 0.00                                                  | 0.00                                     | 3.24                                        | 10.03                                                 | 9.99                                                  | 5.70E-02                              |
| 1CET                     | 0.18                     | 0.00                                                  | 0.00                                     | 2.50                                        | 8.54                                                  | 8.23                                                  | 5.96E-02                              |
| 1CIM                     | 0.31                     | 0.00                                                  | 0.00                                     | 1.73                                        | 22.19                                                 | 22.19                                                 | 5.92E-02                              |
| 1D3P                     | 0.55                     | 0.00                                                  | 0.00                                     | 0.45                                        | 2.10                                                  | 0.00                                                  | 5.61E-02                              |
| 1D4P                     | 0.63                     | 0.00                                                  | 0.00                                     | 4.91                                        | 5.53                                                  | 5.39                                                  | 5.94E-02                              |
| 1D6V                     | 0.53                     | 0.00                                                  | 0.00                                     | 3.16                                        | 11.12                                                 | 11.10                                                 | 5.24E-02                              |
| 1DIB                     | 0.38                     | 0.00                                                  | 1.31                                     | 1.86                                        | 11.88                                                 | 11.88                                                 | 5.37E-02                              |
| 1DLR                     | 0.22                     | 0.00                                                  | 0.00                                     | 1.73                                        | 4.02                                                  | 0.00                                                  | 5.99E-02                              |
| 1EFY                     | 0.29                     | 0.00                                                  | 0.00                                     | 2.11                                        | 30.79                                                 | 30.79                                                 | 5.90E-02                              |
| 1ELA                     | 0.95                     | 0.00                                                  | 1.08                                     | 2.05                                        | 3.48                                                  | 3.46                                                  | 6.00E-02                              |
| 1ETR                     | 0.22                     | 0.00                                                  | 0.00                                     | 3.70                                        | 8.69                                                  | 8.53                                                  | 5.99E-02                              |
| 1ETT                     | 0.37                     | 0.00                                                  | 0.00                                     | 0.00                                        | 0.08                                                  | 0.00                                                  | 3.24E-02                              |
| 1EVE                     | 0.17                     | 0.00                                                  | 0.00                                     | 1.23                                        | 5.27                                                  | 0.00                                                  | 5.91E-02                              |
| 1EXA                     | 0.12                     | 0.00                                                  | 0.00                                     | 2.04                                        | 5.39                                                  | 5.09                                                  | 5.71E-02                              |
| 1EZQ                     | 0.56                     | 0.00                                                  | 0.00                                     | 0.00                                        | 4.44                                                  | 0.00                                                  | 5.58E-02                              |
| 1F0R                     | 0.36                     | 0.00                                                  | 0.00                                     | 0.30                                        | 2.17                                                  | 1.15                                                  | 5.54E-02                              |
| 1F0T                     | 0.28                     | 0.00                                                  | 1.98                                     | 2.72                                        | 3.12                                                  | 0.00                                                  | 5.89E-02                              |
| 1F4E                     | 0.57                     | 0.00                                                  | 1.09                                     | 1.29                                        | 3.86                                                  | 0.00                                                  | 2.01E-02                              |
| 1F4F                     | 0.57                     | 0.00                                                  | 0.40                                     | 1.04                                        | 1.92                                                  | 0.00                                                  | 4.90E-02                              |
| 1F4G                     | 0.61                     | 0.00                                                  | 0.00                                     | 0.00                                        | 5.27                                                  | 4.26                                                  | 5.58E-02                              |
| 1FCX                     | 0.15                     | 0.00                                                  | 1.14                                     | 2.08                                        | 4.54                                                  | 0.00                                                  | 5.90E-02                              |
| 1FCZ                     | 0.15                     | 0.00                                                  | 0.00                                     | 3.33                                        | 23.89                                                 | 23.88                                                 | 5.39E-02                              |
| 1FJS                     | 0.53                     | 0.00                                                  | 0.00                                     | 1.69                                        | 1.92                                                  | 0.00                                                  | 5.76E-02                              |
| 1FKG                     | 0.69                     | 0.00                                                  | 0.00                                     | 0.00                                        | 3.75                                                  | 0.00                                                  | 5.96E-02                              |
| 1FM6                     | 0.20                     | 0.00                                                  | 0.00                                     | 3.86                                        | 7.93                                                  | 7.90                                                  | 5.86E-02                              |
| 1FM9                     | 0.36                     | 0.00                                                  | 0.00                                     | 0.00                                        | 1.35                                                  | 0.00                                                  | 3.58E-02                              |
| 1FRB                     | 0.51                     | 0.00                                                  | 0.00                                     | 0.00                                        | 0.05                                                  | 0.00                                                  | 3.07E-02                              |
| 1G4O                     | 0.30                     | 0.00                                                  | 0.00                                     | 0.00                                        | 1.36                                                  | 0.00                                                  | 5.94E-02                              |
| 1GWX                     | 0.54                     | 0.00                                                  | 0.00                                     | 1.99                                        | 3.03                                                  | 0.00                                                  | 5.94E-02                              |
| 1H1P                     | 0.23                     | 0.00                                                  | 0.00                                     | 2.31                                        | 4.88                                                  | 0.00                                                  | 5.67E-02                              |
| 1H1S                     | 0.37                     | 0.00                                                  | 0.00                                     | 2.95                                        | 11.73                                                 | 11.69                                                 | 5.66E-02                              |
| 1H9U                     | 0.10                     | 0.00                                                  | 1.66                                     | 3.13                                        | 20.38                                                 | 20.38                                                 | 5.99E-02                              |
| 1HDQ                     | 0.33                     | 0.00                                                  | 2.30                                     | 2.56                                        | 24.53                                                 | 24.51                                                 | 4.90E-02                              |
| 1HFC                     | 0.18                     | 0.00                                                  | 0.00                                     | 3.62                                        | 11.03                                                 | 10.97                                                 | 5.98E-02                              |
| 1HPV                     | 0.69                     | 0.00                                                  | 0.00                                     | 2.05                                        | 2.82                                                  | 0.00                                                  | 5.92E-02                              |
| 1HTF                     | 0.53                     | 0.00                                                  | 0.00                                     | 0.79                                        | 1.53                                                  | 0.00                                                  | 5.98E-02                              |
| 1I7Z                     | 0.20                     | 0.00                                                  | 0.00                                     | 2.94                                        | 23.04                                                 | 22.94                                                 | 5.65E-02                              |
| 1I8Z                     | 0.55                     | 0.00                                                  | 0.00                                     | 2.75                                        | 9.31                                                  | 9.08                                                  | 5.18E-02                              |
| 1IF7                     | 0.43                     | 0.00                                                  | 0.00                                     | 2.63                                        | 11.73                                                 | 11.42                                                 | 5.98E-02                              |
| 1IY7                     | 0.26                     | 0.00                                                  | 0.82                                     | 2.93                                        | 21.57                                                 | 21.55                                                 | 5.68E-02                              |

|      |      |      |      |      |       |       |          |
|------|------|------|------|------|-------|-------|----------|
| 1JSV | 0.20 | 0.00 | 1.99 | 2.91 | 20.83 | 20.82 | 5.91E-02 |
| 1K1J | 0.19 | 0.00 | 0.50 | 3.42 | 8.87  | 8.63  | 5.69E-02 |
| 1K22 | 0.45 | 0.00 | 0.00 | 0.38 | 3.62  | 0.00  | 5.94E-02 |
| 1K7E | 0.32 | 0.00 | 0.00 | 0.86 | 4.88  | 3.23  | 5.96E-02 |
| 1K7F | 0.36 | 0.00 | 3.13 | 3.57 | 14.65 | 14.57 | 5.97E-02 |
| 1KV1 | 0.23 | 0.00 | 0.00 | 2.23 | 12.86 | 12.82 | 5.89E-02 |
| 1KV2 | 0.52 | 0.00 | 0.00 | 0.00 | 0.83  | 0.00  | 4.02E-02 |
| 1L2S | 0.30 | 0.00 | 0.00 | 1.50 | 2.05  | 0.00  | 5.96E-02 |
| 1L8G | 0.37 | 0.00 | 2.14 | 2.52 | 9.69  | 9.69  | 5.80E-02 |
| 1LQD | 0.51 | 0.00 | 0.00 | 0.00 | 0.37  | 0.00  | 4.25E-02 |
| 1M48 | 0.17 | 0.00 | 0.00 | 0.00 | 1.10  | 0.00  | 5.87E-02 |
| 1MMB | 0.37 | 0.00 | 0.00 | 2.47 | 3.83  | 0.00  | 5.98E-02 |
| 1MNC | 0.22 | 0.00 | 0.00 | 2.76 | 9.28  | 9.17  | 5.97E-02 |
| 1MQ5 | 0.34 | 0.00 | 2.56 | 3.31 | 7.37  | 7.14  | 5.94E-02 |
| 1MQ6 | 0.32 | 0.00 | 1.02 | 1.66 | 3.18  | 0.00  | 5.61E-02 |
| 1NHU | 0.55 | 0.00 | 0.00 | 0.00 | 0.49  | 0.00  | 5.53E-02 |
| 1NHV | 0.59 | 0.00 | 1.31 | 1.73 | 6.21  | 5.40  | 6.00E-02 |
| 1O86 | 0.52 | 0.00 | 1.74 | 2.71 | 13.30 | 13.29 | 5.84E-02 |
| 1OHR | 0.41 | 0.00 | 2.21 | 3.46 | 11.04 | 10.86 | 5.83E-02 |
| 1PPC | 0.22 | 0.00 | 0.00 | 0.00 | 2.67  | 0.00  | 5.99E-02 |
| 1PPH | 0.41 | 0.00 | 0.00 | 1.06 | 2.90  | 0.00  | 5.24E-02 |
| 1QBU | 0.59 | 0.00 | 2.24 | 2.63 | 5.17  | 4.88  | 5.61E-02 |
| 1QHI | 0.21 | 0.00 | 0.00 | 3.00 | 13.87 | 13.82 | 5.86E-02 |
| 1QL9 | 0.31 | 0.00 | 0.00 | 1.54 | 2.49  | 0.00  | 5.87E-02 |
| 1QPE | 0.25 | 0.00 | 0.00 | 1.33 | 27.13 | 27.13 | 5.97E-02 |
| 1R09 | 0.46 | 0.00 | 1.98 | 2.35 | 4.12  | 0.00  | 3.31E-02 |
| 1SYN | 0.89 | 0.00 | 1.77 | 2.06 | 2.68  | 0.00  | 4.68E-02 |
| 1THL | 0.27 | 1.73 | 2.30 | 3.03 | 4.99  | 4.91  | 5.91E-02 |
| 1UVS | 0.58 | 0.00 | 0.00 | 0.00 | 2.35  | 0.00  | 6.00E-02 |
| 1UVT | 0.46 | 0.00 | 0.00 | 0.00 | 3.06  | 0.00  | 5.90E-02 |
| 1YDR | 0.24 | 0.00 | 1.06 | 2.90 | 7.51  | 6.91  | 5.98E-02 |
| 1YDS | 0.32 | 0.00 | 4.49 | 5.22 | 19.12 | 19.06 | 5.48E-02 |
| 1YDT | 0.43 | 0.00 | 0.00 | 0.00 | 0.14  | 0.00  | 3.33E-02 |
| 2CGR | 0.44 | 0.00 | 0.00 | 0.00 | 2.12  | 0.00  | 5.37E-02 |
| 2CSN | 0.52 | 0.00 | 4.25 | 4.80 | 13.93 | 13.90 | 5.96E-02 |
| 2PCP | 0.16 | 0.00 | 2.56 | 4.16 | 42.28 | 42.28 | 5.95E-02 |
| 2QWI | 0.37 | 0.00 | 0.00 | 1.85 | 24.96 | 24.95 | 5.84E-02 |
| 3CPA | 0.24 | 0.00 | 1.60 | 3.98 | 11.36 | 11.34 | 5.97E-02 |
| 3ERK | 0.37 | 0.00 | 0.00 | 0.00 | 20.33 | 20.33 | 5.93E-02 |
| 3ERT | 0.21 | 0.00 | 2.19 | 3.71 | 16.22 | 16.10 | 5.98E-02 |
| 3STD | 0.38 | 0.00 | 3.87 | 4.42 | 12.15 | 11.97 | 5.58E-02 |
| 3TMN | 0.20 | 0.00 | 0.00 | 2.01 | 6.61  | 5.14  | 5.76E-02 |
| 4DFR | 0.29 | 0.00 | 0.00 | 1.07 | 2.71  | 0.00  | 5.47E-02 |
| 4STD | 0.13 | 0.00 | 0.00 | 3.70 | 12.97 | 12.96 | 5.94E-02 |
| 5STD | 0.16 | 0.00 | 0.21 | 1.80 | 5.37  | 0.00  | 5.54E-02 |
| 5TLN | 0.78 | 0.00 | 1.04 | 2.14 | 7.87  | 7.84  | 5.91E-02 |
| 7DFR | 0.65 | 0.00 | 0.00 | 0.00 | 4.88  | 0.00  | 5.99E-02 |
| 7EST | 0.39 | 0.00 | 0.00 | 0.00 | 0.11  | 0.00  | 5.73E-02 |
| 830C | 0.53 | 0.00 | 0.00 | 1.69 | 2.49  | 0.00  | 5.99E-02 |
| 966C | 0.44 | 0.00 | 0.00 | 0.00 | 2.09  | 0.00  | 5.97E-02 |

- a: PDB: Protein Data Bank  
b: RMSD of all ligand atoms between minimized and initial conformations.  
c: First rotational frequency ( $\text{cm}^{-1}$ ) computed with the second derivative matrix not adjusted to put rotation and translation vectors to a high frequency (ilevel = 0).  
d: First vibrational frequency ( $\text{cm}^{-1}$ ) computed with the second derivative matrix not adjusted to put rotation and translation vectors to a high frequency (ilevel = 0).  
e: First vibrational frequency ( $\text{cm}^{-1}$ ) computed with the second derivative matrix adjusted to put rotation and translation vectors to a high frequency (ilevel = 1).  
f: Root mean square gradient.
