# Supplementary material for: Preference of Small Molecules for Local Minimum Conformations when Binding to Proteins
Source: PubMed Central journal article supplement (PMC1959118; doi:10.1371/journal.pone.0000820), 2007-09-05
Supplement: pone.0000820.s003.pdf [file pone.0000820.s003.pdf]

Table S3. Root mean square deviations, rotational and vibrational frequencies, and gradients of local minimum conformations obtained from NMODE-monitored energy minimization of protein-bound ligand conformations taken from the 100 crystal structures using the steepest descent minimization method with a gradient cutoff of 0.01 kcal/(mol•Å). All three translational frequencies were zero and are not listed.

| PDB code | RSMD <sup>a</sup> (Å) | 1 <sup>st</sup> rot. freq. ilevel = 0 <sup>b</sup> | 2 <sup>nd</sup> rot. freq. ilevel = 0 | 3 <sup>rd</sup> rot. freq. ilevel = 0 | 1 <sup>st</sup> vib. freq. ilevel = 0 <sup>c</sup> | 1 <sup>st</sup> vib. freq. ilevel = 1 <sup>d</sup> | Gradient <sup>e</sup> (kcal/mol•Å) |
|----------|-----------------------|----------------------------------------------------|---------------------------------------|---------------------------------------|----------------------------------------------------|----------------------------------------------------|------------------------------------|
| 13GS     | 0.68                  | 0.00                                               | 1.16                                  | 1.59                                  | 7.10                                               | 7.10                                               | 8.39E-03                           |
| 1A42     | 0.91                  | 0.00                                               | 0.19                                  | 1.44                                  | 12.76                                              | 12.76                                              | 9.43E-03                           |
| 1A4K     | 0.41                  | 0.00                                               | 1.29                                  | 1.77                                  | 13.88                                              | 13.88                                              | 9.46E-03                           |
| 1A8T     | 1.06                  | 0.00                                               | 0.05                                  | 1.46                                  | 6.27                                               | 6.27                                               | 9.30E-03                           |
| 1AFQ     | 0.46                  | 0.00                                               | 0.00                                  | 0.46                                  | 6.88                                               | 6.87                                               | 9.78E-03                           |
| 1AOE     | 0.15                  | 0.00                                               | 0.00                                  | 1.10                                  | 16.80                                              | 16.80                                              | 7.02E-03                           |
| 1ATL     | 0.76                  | 0.00                                               | 0.00                                  | 1.20                                  | 4.95                                               | 4.95                                               | 9.14E-03                           |
| 1AZM     | 0.49                  | 0.00                                               | 0.36                                  | 0.75                                  | 18.34                                              | 18.34                                              | 8.20E-03                           |
| 1BNW     | 1.20                  | 0.00                                               | 0.41                                  | 0.72                                  | 9.10                                               | 9.10                                               | 9.20E-03                           |
| 1BQO     | 1.00                  | 0.00                                               | 0.00                                  | 1.71                                  | 7.73                                               | 7.73                                               | 8.85E-03                           |
| 1BR6     | 0.56                  | 0.00                                               | 0.00                                  | 1.70                                  | 9.06                                               | 9.06                                               | 9.13E-03                           |
| 1CET     | 0.38                  | 0.00                                               | 0.00                                  | 1.16                                  | 6.85                                               | 6.82                                               | 9.22E-03                           |
| 1CIM     | 0.54                  | 0.00                                               | 0.50                                  | 1.22                                  | 21.52                                              | 21.52                                              | 9.31E-03                           |
| 1D3P     | 0.94                  | 0.00                                               | 0.81                                  | 1.56                                  | 7.81                                               | 7.80                                               | 9.09E-03                           |
| 1D4P     | 1.21                  | 0.00                                               | 0.00                                  | 2.20                                  | 16.86                                              | 16.86                                              | 9.06E-03                           |
| 1D6V     | 0.81                  | 0.00                                               | 0.00                                  | 0.36                                  | 13.41                                              | 13.41                                              | 9.92E-03                           |
| 1DIB     | 0.43                  | 0.00                                               | 0.00                                  | 0.65                                  | 11.65                                              | 11.65                                              | 9.28E-03                           |
| 1DLR     | 0.41                  | 0.00                                               | 0.68                                  | 1.84                                  | 8.91                                               | 8.89                                               | 8.76E-03                           |
| 1EFY     | 0.41                  | 0.00                                               | 0.18                                  | 0.50                                  | 34.30                                              | 34.30                                              | 9.35E-03                           |
| 1ELA     | 1.08                  | 0.00                                               | 0.36                                  | 0.87                                  | 9.27                                               | 9.27                                               | 9.44E-03                           |
| 1ETR     | 0.40                  | 0.00                                               | 0.57                                  | 1.69                                  | 9.62                                               | 9.62                                               | 9.14E-03                           |
| 1ETT     | 0.68                  | 0.00                                               | 0.20                                  | 1.79                                  | 7.71                                               | 7.71                                               | 8.33E-03                           |
| 1EVE     | 0.44                  | 0.00                                               | 0.44                                  | 1.01                                  | 10.42                                              | 10.41                                              | 9.75E-03                           |
| 1EXA     | 0.16                  | 0.00                                               | 1.07                                  | 1.35                                  | 4.60                                               | 4.60                                               | 9.60E-03                           |
| 1EZQ     | 0.88                  | 0.00                                               | 0.79                                  | 1.42                                  | 8.00                                               | 8.00                                               | 9.99E-03                           |
| 1F0R     | 1.42                  | 0.00                                               | 0.72                                  | 1.68                                  | 2.12                                               | 1.02                                               | 9.21E-03                           |
| 1F0T     | 0.63                  | 0.00                                               | 0.00                                  | 1.54                                  | 5.23                                               | 5.23                                               | 9.51E-03                           |
| 1F4E     | 0.57                  | 0.00                                               | 0.72                                  | 0.92                                  | 2.19                                               | 0.00                                               | 9.10E-03                           |
| 1F4F     | 1.54                  | 0.00                                               | 0.66                                  | 0.79                                  | 12.54                                              | 12.54                                              | 8.74E-03                           |
| 1F4G     | 1.64                  | 0.00                                               | 0.56                                  | 0.83                                  | 8.20                                               | 8.20                                               | 9.85E-03                           |
| 1FCX     | 0.94                  | 0.00                                               | 0.95                                  | 1.32                                  | 7.65                                               | 7.65                                               | 9.46E-03                           |
| 1FCZ     | 0.34                  | 0.00                                               | 0.00                                  | 0.00                                  | 24.82                                              | 24.82                                              | 9.96E-03                           |
| 1FJS     | 0.77                  | 0.00                                               | 0.00                                  | 0.70                                  | 4.74                                               | 4.74                                               | 9.64E-03                           |
| 1FKG     | 1.12                  | 0.00                                               | 0.00                                  | 1.56                                  | 6.52                                               | 6.51                                               | 9.89E-03                           |
| 1FM6     | 0.30                  | 0.00                                               | 0.00                                  | 1.29                                  | 7.96                                               | 7.96                                               | 9.70E-03                           |
| 1FM9     | 0.42                  | 0.00                                               | 0.00                                  | 0.53                                  | 1.30                                               | 0.00                                               | 8.40E-03                           |
| 1FRB     | 1.03                  | 0.00                                               | 1.27                                  | 1.42                                  | 4.21                                               | 4.21                                               | 9.89E-03                           |
| 1G4O     | 0.86                  | 0.00                                               | 0.24                                  | 1.13                                  | 11.97                                              | 11.97                                              | 8.84E-03                           |
| 1GWX     | 1.63                  | 0.00                                               | 0.53                                  | 1.76                                  | 5.34                                               | 5.34                                               | 9.44E-03                           |
| 1H1P     | 0.68                  | 0.00                                               | 0.00                                  | 0.22                                  | 17.29                                              | 17.29                                              | 7.67E-03                           |
| 1H1S     | 0.74                  | 0.00                                               | 0.00                                  | 1.27                                  | 12.98                                              | 12.98                                              | 9.63E-03                           |
| 1H9U     | 0.26                  | 0.00                                               | 0.00                                  | 1.42                                  | 21.95                                              | 21.95                                              | 6.86E-03                           |
| 1HDQ     | 0.38                  | 0.00                                               | 0.00                                  | 1.04                                  | 24.13                                              | 24.13                                              | 7.42E-03                           |
| 1HFC     | 0.33                  | 0.00                                               | 0.81                                  | 1.18                                  | 13.87                                              | 13.87                                              | 9.47E-03                           |
| 1HPV     | 1.08                  | 0.00                                               | 0.62                                  | 1.07                                  | 8.99                                               | 8.98                                               | 9.73E-03                           |
| 1HTF     | 1.09                  | 0.00                                               | 0.00                                  | 1.23                                  | 1.46                                               | 0.00                                               | 8.58E-03                           |
| 1I7Z     | 0.38                  | 0.00                                               | 0.00                                  | 1.48                                  | 18.01                                              | 18.01                                              | 8.14E-03                           |
| 1I8Z     | 0.69                  | 0.00                                               | 0.58                                  | 1.35                                  | 13.15                                              | 13.15                                              | 9.85E-03                           |
| 1IF7     | 0.84                  | 0.00                                               | 0.92                                  | 1.21                                  | 12.64                                              | 12.63                                              | 9.49E-03                           |
| 1IY7     | 0.35                  | 0.00                                               | 0.47                                  | 0.70                                  | 21.79                                              | 21.79                                              | 9.96E-03                           |

|                   |      |      |      |      |       |       |          |
|-------------------|------|------|------|------|-------|-------|----------|
| 1JSV              | 0.32 | 0.00 | 0.00 | 0.00 | 18.35 | 18.35 | 9.74E-03 |
| 1K1J              | 0.45 | 0.00 | 0.00 | 1.46 | 9.97  | 9.97  | 9.37E-03 |
| 1K22              | 1.09 | 0.00 | 1.33 | 1.58 | 8.40  | 8.39  | 9.94E-03 |
| 1K7E              | 0.53 | 0.00 | 0.00 | 0.70 | 5.75  | 5.74  | 8.79E-03 |
| 1K7F              | 0.53 | 0.00 | 1.31 | 1.40 | 12.35 | 12.35 | 9.98E-03 |
| 1KV1              | 0.31 | 0.00 | 0.53 | 1.79 | 10.76 | 10.76 | 9.60E-03 |
| 1KV2              | 0.73 | 0.00 | 0.00 | 0.88 | 5.34  | 5.34  | 9.08E-03 |
| 1L2S              | 0.62 | 0.00 | 0.99 | 1.24 | 5.31  | 5.30  | 8.09E-03 |
| 1L8G              | 0.50 | 0.00 | 0.00 | 0.48 | 9.58  | 9.58  | 6.20E-03 |
| 1LQD              | 1.10 | 0.00 | 0.00 | 1.99 | 6.35  | 6.35  | 9.69E-03 |
| 1M48              | 0.31 | 0.00 | 0.37 | 0.97 | 1.78  | 0.00  | 8.97E-03 |
| 1MMB              | 0.50 | 0.00 | 0.00 | 1.17 | 8.61  | 8.61  | 9.97E-03 |
| 1MNC              | 0.33 | 0.00 | 0.95 | 1.44 | 11.14 | 11.14 | 8.73E-03 |
| 1MQ5              | 0.54 | 0.00 | 0.33 | 0.88 | 8.64  | 8.64  | 9.72E-03 |
| 1MQ6              | 0.46 | 0.00 | 0.00 | 0.00 | 0.88  | 0.00  | 9.96E-03 |
| 1NHU              | 0.70 | 0.00 | 0.00 | 1.45 | 5.63  | 5.63  | 9.55E-03 |
| 1NHV              | 0.63 | 0.00 | 0.85 | 1.02 | 6.30  | 6.29  | 9.95E-03 |
| 1O86              | 0.74 | 0.00 | 0.00 | 0.91 | 12.74 | 12.74 | 7.98E-03 |
| 1OHR              | 0.93 | 0.00 | 0.85 | 1.37 | 8.22  | 8.22  | 9.39E-03 |
| 1PPC              | 1.00 | 0.00 | 0.00 | 1.80 | 6.38  | 6.37  | 9.60E-03 |
| 1PPH              | 0.45 | 0.00 | 0.00 | 1.76 | 8.60  | 8.60  | 9.14E-03 |
| 1QBU              | 1.11 | 0.00 | 0.89 | 1.02 | 4.76  | 4.66  | 9.39E-03 |
| 1QHI              | 0.29 | 0.00 | 0.00 | 0.86 | 16.13 | 16.13 | 9.43E-03 |
| 1QL9              | 0.64 | 0.00 | 0.00 | 1.45 | 2.03  | 0.00  | 9.96E-03 |
| 1QPE              | 0.30 | 0.00 | 0.00 | 0.59 | 28.78 | 28.78 | 6.95E-03 |
| 1R09              | 0.50 | 0.00 | 1.39 | 1.51 | 2.97  | 2.89  | 7.76E-03 |
| 1SYN              | 2.33 | 0.00 | 0.00 | 0.87 | 1.16  | 0.00  | 8.99E-03 |
| 1THL              | 0.53 | 0.00 | 0.00 | 1.31 | 8.00  | 8.00  | 9.75E-03 |
| 1UVS              | 0.94 | 0.00 | 0.55 | 1.26 | 6.16  | 6.16  | 9.24E-03 |
| 1UVT              | 0.79 | 0.00 | 0.00 | 0.00 | 1.41  | 0.00  | 9.88E-03 |
| 1YDR              | 0.31 | 0.00 | 0.00 | 1.43 | 13.37 | 13.37 | 8.73E-03 |
| 1YDS              | 0.41 | 0.00 | 1.15 | 1.30 | 25.03 | 25.03 | 8.12E-03 |
| 1YDT              | 0.75 | 0.00 | 0.00 | 0.99 | 1.32  | 0.00  | 9.53E-03 |
| 2CGR              | 1.12 | 0.00 | 0.98 | 1.58 | 7.23  | 7.23  | 9.42E-03 |
| 2CSN              | 0.96 | 0.00 | 1.32 | 1.63 | 37.68 | 37.68 | 7.64E-03 |
| 2PCP              | 0.24 | 0.00 | 0.00 | 1.43 | 33.14 | 33.14 | 8.50E-03 |
| 2QWI              | 0.49 | 0.00 | 0.92 | 1.18 | 25.45 | 25.45 | 1.00E-02 |
| 3CPA              | 0.43 | 0.00 | 0.40 | 0.83 | 11.60 | 11.59 | 7.43E-03 |
| 3ERK              | 0.42 | 0.00 | 0.00 | 1.20 | 21.72 | 21.72 | 9.67E-03 |
| 3ERT              | 0.39 | 0.00 | 0.77 | 0.99 | 17.96 | 17.96 | 8.88E-03 |
| 3STD <sup>f</sup> | 0.72 | 0.69 | 1.11 | 1.28 | 13.34 | 13.34 | 3.81E-03 |
| 3TMN              | 0.24 | 0.00 | 1.12 | 1.45 | 14.37 | 14.37 | 9.90E-03 |
| 4DFR              | 1.22 | 0.00 | 1.39 | 1.63 | 6.60  | 6.60  | 9.89E-03 |
| 4STD              | 0.22 | 0.00 | 0.00 | 0.72 | 16.83 | 16.83 | 8.82E-03 |
| 5STD              | 0.60 | 0.00 | 1.10 | 1.33 | 14.60 | 14.60 | 9.54E-03 |
| 5TLN              | 1.06 | 0.00 | 0.58 | 0.69 | 7.06  | 7.05  | 9.21E-03 |
| 7DFR              | 1.14 | 0.00 | 0.14 | 0.78 | 6.23  | 6.20  | 7.90E-03 |
| 7EST              | 0.66 | 0.00 | 0.00 | 1.35 | 5.70  | 5.70  | 9.83E-03 |
| 830C              | 1.32 | 0.00 | 0.52 | 1.03 | 8.55  | 8.55  | 8.66E-03 |
| 966C              | 0.51 | 0.00 | 0.00 | 1.22 | 15.07 | 15.07 | 9.15E-03 |

- a: PDB: Protein Data Bank  
b: RMSD of all ligand atoms between minimized and initial conformations.  
c: First rotational frequency ( $\text{cm}^{-1}$ ) computed with the second derivative matrix not adjusted to put rotation and translation vectors to a high frequency (ilevel = 0).  
d: First vibrational frequency ( $\text{cm}^{-1}$ ) computed with the second derivative matrix not adjusted to put rotation and translation vectors to a high frequency (ilevel = 0).  
e: First vibrational frequency ( $\text{cm}^{-1}$ ) computed with the second derivative matrix adjusted to put rotation and translation vectors to a high frequency (ilevel = 1).  
f: Root mean square gradient.  
g: Required cycles of 20 steps instead of 10 steps due to numeric truncations.
