# Supplementary material for: Preference of Small Molecules for Local Minimum Conformations when Binding to Proteins
Source: PubMed Central journal article supplement (PMC1959118; doi:10.1371/journal.pone.0000820), 2007-09-05
Supplement: pone.0000820.s004.pdf [file pone.0000820.s004.pdf]

Table S4. The AMBER force field parameters developed for the 100 protein-bound ligands.

|       |       |       |
|-------|-------|-------|
| MASS  |       |       |
| Br    | 79.9  | 2.88  |
| C     | 12.01 | 0.616 |
| C*    | 12.01 | 0.36  |
| C2    | 12.01 | 0.36  |
| CA    | 12.01 | 0.36  |
| CB    | 12.01 | 0.36  |
| CC    | 12.01 | 0.36  |
| CD    | 12.01 | 0.36  |
| CG    | 12.01 | 0.36  |
| CK    | 12.01 | 0.36  |
| CI    | 35.45 | 1.91  |
| CM    | 12.01 | 0.36  |
| CN    | 12.01 | 0.36  |
| CR    | 12.01 | 0.36  |
| CT    | 12.01 | 0.878 |
| CV    | 12.01 | 0.36  |
| CW    | 12.01 | 0.36  |
| CX    | 12.01 | 0.36  |
| CZ    | 12.01 | 0.36  |
| F     | 19    | 0.32  |
| H     | 1.008 | 0.161 |
| H1    | 1.008 | 0.135 |
| H2    | 1.008 | 0.135 |
| H4    | 1.008 | 0.135 |
| H5    | 1.008 | 0.135 |
| HA    | 1.008 | 0.135 |
| HC    | 1.008 | 0.135 |
| HO    | 1.008 | 0.135 |
| HP    | 1.008 | 0.135 |
| HS    | 1.008 | 0.135 |
| N     | 14.01 | 0.53  |
| N*    | 14.01 | 0.53  |
| N1    | 14.01 | 0.53  |
| N2    | 14.01 | 0.53  |
| N3    | 14.01 | 0.53  |
| NA    | 14.01 | 0.53  |
| NB    | 14.01 | 0.53  |
| NC    | 14.01 | 0.53  |
| NE    | 14.01 | 0.53  |
| NF    | 14.01 | 0.53  |
| NH    | 14.01 | 0.53  |
| NO    | 14.01 | 0.53  |
| NT    | 14.01 | 0.53  |
| O     | 16    | 0.434 |
| OH    | 16    | 0.465 |
| OS    | 16    | 0.465 |
| S     | 32.06 | 2.9   |
| S6    | 32.06 | 2.9   |
| SH    | 32.06 | 2.9   |
| SY    | 32.06 | 2.9   |
| BOND  |       |       |
| C*-C* | 473.7 | 1.39  |
| C*-CI | 322.8 | 1.729 |
| C*-CM | 473.7 | 1.39  |
| C*-CV | 473.7 | 1.39  |
| C*-OS | 364   | 1.38  |
| C2-N2 | 581.1 | 1.288 |
| C2-N3 | 309.1 | 1.482 |

|       |       |       |
|-------|-------|-------|
| C2-NH | 462.6 | 1.355 |
| C2-OS | 392.6 | 1.357 |
| CA-C* | 366   | 1.472 |
| CA-CA | 478.4 | 1.387 |
| CA-CC | 473.7 | 1.39  |
| CA-CG | 406.6 | 1.438 |
| CA-CR | 473.7 | 1.39  |
| CA-CX | 350.8 | 1.486 |
| CA-CZ | 404.1 | 1.44  |
| CA-N* | 440.2 | 1.37  |
| CA-NA | 470.3 | 1.35  |
| CA-NB | 483.1 | 1.342 |
| CA-NE | 361.8 | 1.431 |
| CA-NF | 361.8 | 1.431 |
| CA-NH | 449   | 1.364 |
| CA-NO | 322.6 | 1.468 |
| CA-OS | 364   | 1.38  |
| CA-S  | 307.7 | 1.7   |
| CA-SY | 247.7 | 1.784 |
| CB-CM | 473.7 | 1.39  |
| CB-CV | 473.7 | 1.39  |
| CB-NA | 438.8 | 1.371 |
| CB-OS | 364   | 1.38  |
| CB-SY | 248.9 | 1.782 |
| C-C*  | 346.5 | 1.49  |
| CC-C  | 346.5 | 1.49  |
| CC-C* | 473.7 | 1.39  |
| CC-CM | 473.7 | 1.39  |
| CC-N  | 426   | 1.38  |
| CC-OS | 364   | 1.38  |
| CD-N  | 426   | 1.38  |
| CD-NC | 494.6 | 1.335 |
| CG-N1 | 994.7 | 1.143 |
| CM-CI | 322.8 | 1.729 |
| CM-N2 | 599.8 | 1.279 |
| CM-NA | 440.2 | 1.37  |
| CM-NC | 431.6 | 1.376 |
| CM-NH | 449   | 1.364 |
| CM-NT | 486.3 | 1.34  |
| CR-C* | 473.7 | 1.39  |
| CR-N  | 426   | 1.38  |
| CR-N* | 440.2 | 1.37  |
| CR-S  | 307.7 | 1.7   |
| C-S   | 231.5 | 1.81  |
| CT-CX | 322.5 | 1.514 |
| CT-NA | 334.7 | 1.456 |
| CT-NH | 332.7 | 1.458 |
| CT-S6 | 254   | 1.774 |
| CT-SY | 248.9 | 1.782 |
| CV-CA | 473.7 | 1.39  |
| CV-CT | 330.3 | 1.51  |
| CV-OS | 364   | 1.38  |
| CX-CX | 337.3 | 1.499 |
| CX-HC | 345.8 | 1.086 |
| H-NH  | 401.2 | 1.014 |
| N*-C* | 440.2 | 1.37  |
| N*-NA | 453.3 | 1.401 |
| NA-NC | 535.7 | 1.35  |
| NB-N* | 535.7 | 1.35  |
| NB-NB | 486.8 | 1.379 |
| NB-SY | 439.8 | 1.555 |
| NC-NC | 550.2 | 1.342 |

|       |       |       |
|-------|-------|-------|
| NE-NF | 738.6 | 1.257 |
| NH-SY | 324.2 | 1.664 |
| N-NC  | 532.1 | 1.352 |
| N-OH  | 395.4 | 1.41  |
| NO-O  | 761.2 | 1.219 |
| NT-S6 | 353.8 | 1.632 |
| NT-SY | 324.2 | 1.664 |
| O-S   | 493   | 1.466 |
| O-S6  | 541.1 | 1.436 |
| O-SY  | 493   | 1.466 |
| S-C*  | 307.7 | 1.7   |
| S-CB  | 307.7 | 1.7   |
| S-CC  | 307.7 | 1.7   |

ANGLE

|          |       |        |
|----------|-------|--------|
| C*-C-N   | 70.2  | 111.86 |
| CA-C-CT  | 63.33 | 115.23 |
| CA-C-NA  | 62.8  | 119.53 |
| CA-C-NC  | 67.19 | 112.17 |
| CA-N-H   | 47.6  | 114.59 |
| CA-S-C*  | 66.5  | 95.23  |
| CA-S-CA  | 62.4  | 99.92  |
| CB-C-N   | 70.2  | 111.86 |
| CC-C-N   | 68    | 112.68 |
| CC-C-O   | 67.1  | 126.4  |
| C-C-CT   | 61.7  | 116.69 |
| CC-N-H   | 47.5  | 121.52 |
| CD-N-H   | 47.5  | 121.52 |
| CD-N-NC  | 67.9  | 117.57 |
| CM-C-CA  | 64.1  | 114.03 |
| CM-C-N   | 68    | 112.68 |
| C-N-C    | 62.4  | 128.18 |
| C-N-C*   | 64.3  | 123.71 |
| C-N-CA   | 64.3  | 123.71 |
| C-N-CC   | 65.2  | 124.19 |
| C-N-CD   | 65.2  | 124.19 |
| C-N-CR   | 65.2  | 124.19 |
| C-N-NC   | 68.6  | 120.31 |
| C-N-OH   | 69.5  | 113.39 |
| CR-N-H   | 47.5  | 121.52 |
| CR-S-CA  | 66.5  | 95.23  |
| CT-N-CA  | 62.4  | 121.15 |
| CT-N-NC  | 63.3  | 121.17 |
| CT-S-CA  | 61.3  | 100.62 |
| H-N-OH   | 50.7  | 109.21 |
| N-C-C    | 61.76 | 116.17 |
| N-C-CA   | 68    | 112.68 |
| N-C-N    | 71.3  | 114.54 |
| N-C-OS   | 75.74 | 111.02 |
| N-C-S    | 55.64 | 113.78 |
| O-C-C*   | 67.1  | 126.4  |
| O-C-CA   | 67.1  | 126.4  |
| O-C-S    | 62.8  | 122.98 |
| OS-C-CA  | 67.66 | 110.77 |
| C*-C*-C  | 62    | 122.13 |
| C*-C*-C* | 63    | 120    |
| C*-C*-CC | 63    | 120    |
| C*-C*-CI | 57.1  | 119.36 |
| C*-C*-HA | 50    | 120    |
| C*-C*-OS | 66.1  | 122.03 |
| C*-CA-N* | 68.7  | 111.2  |
| C*-CA-NA | 70.2  | 118.34 |

|          |       |        |
|----------|-------|--------|
| C*-CA-SY | 62    | 120.35 |
| C*-CC-C  | 62    | 122.13 |
| C*-CC-N  | 70.7  | 115.52 |
| C*-CC-NA | 68.7  | 111.2  |
| C*-CC-NB | 72.2  | 106.8  |
| C*-CM-CM | 63    | 120    |
| C*-CM-NA | 68.7  | 111.2  |
| C*-CR-N  | 70.7  | 115.52 |
| C*-CR-N* | 68.7  | 111.2  |
| C*-CT-CA | 64.3  | 110.36 |
| C*-CT-H1 | 47    | 110.15 |
| C*-CT-NT | 66.5  | 111.47 |
| C*-CV-CT | 61.4  | 122.59 |
| C*-CV-NB | 70.2  | 118.34 |
| C*-OS-CB | 62.7  | 120.91 |
| C*-S-CB  | 66.5  | 95.23  |
| C2-N2-CT | 66.1  | 115.3  |
| C2-N3-CT | 62.8  | 110.64 |
| C2-N3-H  | 46.4  | 111.36 |
| C2-NH-CA | 65.5  | 123.66 |
| C2-NH-CT | 63.2  | 123.71 |
| C2-NH-H  | 49    | 117.94 |
| C2-OS-CT | 64.2  | 112.09 |
| CA-C*-C* | 66    | 120.1  |
| CA-C*-CT | 63.8  | 120.63 |
| CA-C*-S  | 61.1  | 120.79 |
| CA-CA-C* | 66    | 120.1  |
| CA-CA-CC | 63    | 120    |
| CA-CA-CG | 65.9  | 120.05 |
| CA-CA-CR | 63    | 120    |
| CA-CA-CX | 64.8  | 119.68 |
| CA-CA-N* | 70.2  | 118.34 |
| CA-CA-NB | 69.2  | 122.63 |
| CA-CA-NC | 70.1  | 119.72 |
| CA-CA-NE | 67.7  | 119.88 |
| CA-CA-NF | 67.7  | 119.88 |
| CA-CA-NH | 69.3  | 120.13 |
| CA-CA-NO | 66.9  | 119.54 |
| CA-CA-S  | 62    | 119.93 |
| CA-CA-SY | 62    | 120.35 |
| CA-CB-CV | 63    | 120    |
| CA-CB-NA | 72.9  | 109.42 |
| CA-CB-OS | 66.1  | 122.03 |
| CA-CB-SY | 61.6  | 119.89 |
| CA-CC-CT | 61.4  | 122.59 |
| CA-CC-NB | 70.2  | 115.05 |
| CA-CC-OS | 66.1  | 122.03 |
| CA-CG-N1 | 58.8  | 180    |
| CA-CM-C  | 62    | 122.13 |
| CA-CM-CA | 63    | 120    |
| CA-CM-CI | 58.4  | 119.9  |
| CA-CM-CT | 61.4  | 122.59 |
| CA-CM-N2 | 68.5  | 120.72 |
| CA-CM-NC | 70.1  | 119.72 |
| CA-CM-NH | 69.3  | 120.13 |
| CA-CR-NA | 68.7  | 111.2  |
| CA-CR-NB | 70.1  | 119.72 |
| CA-CT-CA | 64.3  | 110.36 |
| CA-CT-NH | 66.5  | 111.47 |
| CA-CT-NT | 66.5  | 111.47 |
| CA-CT-OS | 67.17 | 110.49 |
| CA-CX-CA | 63.6  | 112.47 |

|          |       |        |
|----------|-------|--------|
| CA-CZ-CZ | 56.9  | 180    |
| CA-N*-C  | 70    | 125.2  |
| CA-N*-NA | 66.3  | 123.76 |
| CA-N*-NB | 69.3  | 117.85 |
| CA-NA-CA | 67.1  | 119.8  |
| CA-NA-CB | 68.5  | 113.15 |
| CA-NA-H  | 48.2  | 122.77 |
| CA-NA-N* | 66.3  | 123.76 |
| CA-NA-NC | 69.3  | 117.85 |
| CA-NB-CB | 68.6  | 115.86 |
| CA-NB-NB | 71.4  | 109.51 |
| CA-NC-CA | 68.6  | 115.86 |
| CA-NC-CD | 71.1  | 108.82 |
| CA-NC-N  | 73.8  | 104.69 |
| CA-NC-N* | 70.04 | 109.6  |
| CA-NC-NA | 74.1  | 104.16 |
| CA-NC-NC | 69.4  | 118.89 |
| CA-NE-NF | 69.9  | 114.72 |
| CA-NF-NE | 69.9  | 114.72 |
| CA-NH-CA | 64.3  | 127.46 |
| CA-NH-CM | 64.3  | 127.46 |
| CA-NH-H  | 49.6  | 113.79 |
| CA-NH-SY | 64    | 117.74 |
| CA-NO-O  | 68.7  | 118.1  |
| CA-OS-CA | 62.7  | 120.91 |
| CA-S-C*  | 66.5  | 95.23  |
| CA-S-CB  | 66.5  | 95.23  |
| CA-S-CC  | 66.5  | 95.23  |
| CA-SY-CA | 61.1  | 102.78 |
| CA-SY-NH | 65.2  | 100.83 |
| CA-SY-NT | 65.2  | 100.83 |
| CA-SY-O  | 66.4  | 107.25 |
| CB-C*-C* | 63    | 120    |
| CB-C*-CA | 63    | 120    |
| CB-C*-CC | 63    | 120    |
| CB-C*-HA | 48.4  | 122.89 |
| CB-CA-OS | 66.1  | 122.03 |
| CB-CB-C* | 68.2  | 114.19 |
| CB-CB-CM | 63    | 120    |
| CB-CB-CV | 63    | 120    |
| CB-CB-OS | 66.1  | 122.03 |
| CB-CB-SY | 61.6  | 119.89 |
| CB-CM-C  | 62    | 122.13 |
| CB-CM-CA | 63    | 120    |
| CB-CM-NA | 68.7  | 111.2  |
| CB-CM-OS | 66.1  | 122.03 |
| CB-CV-NB | 71    | 114.98 |
| CB-CV-OS | 66.1  | 122.03 |
| CB-N*-C* | 67.7  | 110.55 |
| CB-N*-CA | 67.7  | 110.55 |
| CB-SY-NB | 65.2  | 100.83 |
| CB-SY-NH | 65.2  | 100.83 |
| CB-SY-O  | 66.4  | 107.25 |
| C-C*-C*  | 64.6  | 120.14 |
| C-C*-CC  | 62    | 122.13 |
| C-C*-S   | 73.99 | 117.58 |
| C-CA-S   | 62    | 119.93 |
| CC-C*-CM | 63    | 120    |
| CC-CM-CA | 63    | 120    |
| C-CM-OS  | 66.17 | 116.86 |
| CC-NB-CC | 68.6  | 110.19 |
| CC-OS-CA | 62.7  | 120.91 |

|          |       |        |
|----------|-------|--------|
| C-CT-C   | 63.7  | 112.95 |
| C-CT-C*  | 64.16 | 110.97 |
| C-CT-CA  | 64.16 | 110.97 |
| C-CT-H2  | 50    | 109.5  |
| C-CT-NH  | 68.6  | 105.72 |
| C-CT-OH  | 66.94 | 111.33 |
| C-CT-S   | 65.98 | 110.19 |
| CG-CA-NC | 67    | 120    |
| CK-N*-C* | 67.7  | 110.55 |
| CK-NB-CC | 68.5  | 113.15 |
| CM-CA-CA | 63    | 120    |
| CM-CA-CB | 63    | 120    |
| CM-CA-CM | 63    | 120    |
| CM-CA-HA | 50    | 120    |
| CM-CA-N  | 68    | 119.89 |
| CM-CA-NH | 69.3  | 120.13 |
| CM-CC-C* | 63    | 120    |
| CM-CC-NB | 72.9  | 109.42 |
| CM-CM-CM | 63    | 120    |
| CM-CM-NH | 69.3  | 120.13 |
| CM-CT-CA | 64.3  | 110.36 |
| CM-CT-NH | 66.6  | 109.78 |
| CM-NA-CA | 67.7  | 110.55 |
| CM-NC-CA | 68.6  | 115.86 |
| CM-NH-CA | 64.3  | 127.46 |
| CM-NH-H  | 48.9  | 117.16 |
| CN-CB-CM | 63    | 120    |
| CN-CB-NB | 70.1  | 119.72 |
| CN-NA-CC | 67.7  | 110.55 |
| CR-C*-CV | 63    | 120    |
| CR-C*-HA | 50    | 120    |
| CR-N*-CA | 67.7  | 110.55 |
| CR-N*-CT | 62.7  | 123.21 |
| CR-N*-NB | 70.2  | 113.02 |
| CR-NA-CB | 67.7  | 110.55 |
| CR-NA-CN | 67.7  | 110.55 |
| CR-NB-NB | 71.4  | 109.51 |
| C-S-CT   | 61.2  | 98.71  |
| CT-C*-C* | 61.4  | 122.59 |
| CT-C2-NH | 66.7  | 118.59 |
| CT-CA-C* | 63.8  | 120.63 |
| CT-CA-CB | 61.4  | 122.59 |
| CT-CA-CC | 61.4  | 122.59 |
| CT-CA-NA | 65.09 | 115.06 |
| CT-CA-NB | 64.46 | 118.4  |
| CT-CA-NH | 66.7  | 118.59 |
| CT-CA-S  | 75.22 | 115.97 |
| CT-CD-N  | 66.4  | 121.96 |
| CT-CD-NC | 66.4  | 121.96 |
| CT-CM-CA | 61.4  | 122.59 |
| CT-CT-NA | 65.8  | 112.59 |
| CT-CT-NH | 66.6  | 109.78 |
| CT-CT-S6 | 62.4  | 111.9  |
| CT-CT-SY | 43.7  | 108.09 |
| CT-CV-NB | 64.46 | 118.4  |
| CT-CX-CX | 61.7  | 120.67 |
| CT-CX-HC | 45.8  | 117.92 |
| CT-N*-C* | 62.7  | 123.21 |
| CT-N*-CA | 63.1  | 124.36 |
| CT-N*-NA | 65.7  | 120.46 |
| CT-N2-CM | 60.6  | 123.2  |
| CT-NA-CA | 63.1  | 124.36 |

|          |       |        |
|----------|-------|--------|
| CT-NA-CB | 62.6  | 125.09 |
| CT-NH-CA | 64.6  | 117.77 |
| CT-NH-CM | 63.7  | 121.18 |
| CT-NH-H  | 46.5  | 114.95 |
| CT-NT-CM | 16.9  | 116.39 |
| CT-NT-S  | 43    | 113.89 |
| CT-NT-S6 | 63.9  | 115.81 |
| CT-NT-SY | 63.9  | 115.81 |
| CT-OS-CA | 61.74 | 117.87 |
| CT-S6-NT | 65.2  | 102.92 |
| CT-S6-O  | 66.6  | 108.32 |
| CT-SY-CA | 60.9  | 103.17 |
| CT-SY-O  | 66    | 108.48 |
| CV-CA-CA | 63    | 120    |
| CV-CA-H4 | 50    | 120    |
| CV-CA-NB | 66.9  | 126.21 |
| CV-CA-S  | 61.1  | 120.79 |
| CV-CT-CT | 63    | 114    |
| CV-NB-N* | 70.04 | 109.6  |
| CV-NB-NB | 69.4  | 118.89 |
| CV-NB-SY | 62.9  | 114.81 |
| CV-OS-CT | 61.74 | 117.87 |
| CX-CA-NC | 65.8  | 121.44 |
| CX-CT-H1 | 46.7  | 111.35 |
| CX-CT-N  | 65.9  | 112.13 |
| CX-CX-CA | 62.5  | 114.61 |
| CX-CX-CX | 85.3  | 63.75  |
| CX-CX-HC | 45.8  | 117.92 |
| CZ-CA-CA | 63    | 120    |
| F-CT-C   | 63.95 | 110.33 |
| F-CT-CA  | 64.12 | 109.73 |
| H1-CT-CA | 50    | 109.5  |
| H1-CT-NA | 49.9  | 109.5  |
| H1-CT-NH | 49.7  | 109.96 |
| H1-CT-S6 | 43.8  | 108.2  |
| H1-CT-SY | 43.7  | 108.09 |
| H4-CA-C* | 50    | 120    |
| H4-CA-CM | 50    | 120    |
| H4-CA-NA | 51.9  | 114.65 |
| H4-CA-NC | 51.8  | 115.94 |
| H4-CV-CA | 50    | 120    |
| H5-CA-NA | 50.7  | 122.11 |
| H5-CA-NC | 50.7  | 122.11 |
| HA-C*-C* | 50    | 120    |
| HA-C*-CA | 50    | 120    |
| HA-C*-CB | 50    | 120    |
| HA-C*-CC | 50    | 120    |
| HA-C*-CV | 50    | 120    |
| HA-CA-CM | 50    | 120    |
| HC-CX-HC | 38.6  | 114.47 |
| H-NA-CB  | 46.5  | 125.33 |
| H-NA-CM  | 46.5  | 125.33 |
| H-NA-N*  | 50    | 119.61 |
| H-NA-NC  | 50    | 119.61 |
| H-NH-H   | 40.1  | 114.43 |
| H-NH-SY  | 45.2  | 109.1  |
| H-NT-S6  | 45.4  | 112.52 |
| H-NT-SY  | 45.2  | 109.1  |
| HP-CT-C* | 50    | 109.5  |
| HP-CT-CA | 50    | 109.5  |
| HP-CT-CM | 50    | 109.5  |
| N*-C*-C  | 65.77 | 116.66 |

|          |       |        |
|----------|-------|--------|
| N*-C*-C* | 68.7  | 111.2  |
| N*-C*-CC | 68.7  | 111.2  |
| N*-CA-CM | 68.7  | 111.2  |
| N*-CA-CT | 65.09 | 115.06 |
| N*-CA-NC | 70.2  | 128.56 |
| N*-CB-CA | 68.7  | 111.2  |
| N*-CT-CA | 66.3  | 111.92 |
| N2-C2-OS | 74.6  | 118.96 |
| N2-CM-NH | 72.6  | 124.27 |
| N3-C2-N2 | 67.1  | 121.24 |
| N3-C2-OS | 51.7  | 116.11 |
| N3-CT-C* | 65.68 | 111.84 |
| N3-CT-CA | 65.68 | 111.84 |
| N3-CT-CM | 65.68 | 111.84 |
| NA-CA-CA | 68.7  | 111.2  |
| NA-CA-NA | 74.5  | 113.32 |
| NA-CA-NC | 70.2  | 128.56 |
| NA-CA-NH | 72.6  | 118.96 |
| NA-CA-OH | 69.8  | 119.94 |
| NA-CB-CB | 68.7  | 111.2  |
| NA-CB-NA | 74.5  | 113.32 |
| NA-CB-NC | 69.7  | 125.32 |
| NA-CC-C  | 65.77 | 116.66 |
| NA-CM-CM | 68.7  | 111.2  |
| NA-CM-NH | 72.4  | 120.11 |
| NA-CM-OS | 73.53 | 113.53 |
| NB-CA-NB | 71.2  | 125.84 |
| NB-CA-SY | 62.8  | 120.01 |
| NB-CB-CM | 70.2  | 115.05 |
| NB-CC-OS | 71.64 | 116.86 |
| NB-CR-S  | 66.5  | 114.51 |
| NB-CV-CA | 70.1  | 119.72 |
| NB-CV-NB | 71.2  | 125.84 |
| NB-CV-OS | 71.64 | 116.86 |
| NB-N*-CT | 65.7  | 120.46 |
| NB-NB-NB | 70.4  | 121.04 |
| NB-SY-O  | 68.9  | 107.06 |
| N-CA-NC  | 69.7  | 123.86 |
| N-CA-NH  | 71.3  | 116.16 |
| NC-CA-C  | 64.99 | 120    |
| NC-CA-CT | 64.46 | 118.4  |
| NC-CA-NC | 71.2  | 125.84 |
| NC-CA-NH | 73.9  | 111.94 |
| NC-CB-C* | 70.1  | 119.72 |
| NC-CM-NH | 73.9  | 111.94 |
| N-CC-S   | 67.4  | 109.31 |
| N-CD-NC  | 70.9  | 123.86 |
| N-CM-NH  | 72.2  | 117.01 |
| N-CR-N*  | 70.9  | 123.86 |
| N-CR-NB  | 69.7  | 123.86 |
| N-CR-S   | 67.4  | 109.31 |
| N-CT-CA  | 66.18 | 112.06 |
| NH-C2-NH | 72.9  | 117.5  |
| NH-CA-NH | 71.4  | 120.98 |
| NH-CM-NH | 71.4  | 120.98 |
| NH-SY-O  | 70.9  | 108.46 |
| NT-CM-CA | 69.5  | 121.19 |
| NT-CM-NT | 46.6  | 122.38 |
| NT-CT-C  | 80    | 111.2  |
| NT-CT-H2 | 50    | 109.5  |
| NT-CT-NT | 69.3  | 110.48 |
| NT-CT-S  | 65.06 | 109.64 |



|          |       |        |
|----------|-------|--------|
| NT-S6-NT | 69.5  | 104.28 |
| NT-S6-O  | 72.9  | 106.8  |
| NT-SY-O  | 70.9  | 108.46 |
| OH-CT-CA | 67.12 | 110.72 |
| O-NO-O   | 76.4  | 127.55 |
| O-S6-O   | 74.6  | 119.82 |
| OS-CA-CA | 66.1  | 122.03 |
| OS-CA-CC | 66.1  | 122.03 |
| OS-CA-CT | 65.53 | 115.27 |
| OS-CA-NC | 71.64 | 116.86 |
| O-SY-O   | 72.4  | 121.88 |
| S-C*-C*  | 62    | 119.93 |
| S-CA-C*  | 62    | 119.93 |
| S-CA-NB  | 71.16 | 117.58 |
| S-CA-S   | 65.5  | 115.15 |
| S-CA-SY  | 62.2  | 122.3  |
| S-CB-CA  | 61.1  | 120.79 |
| S-CB-CB  | 62    | 119.93 |
| S-CB-SY  | 62.2  | 122.3  |
| S-CC-C*  | 61.1  | 120.79 |
| S-CT-H2  | 50    | 109.5  |

DIHEDRAL

|           |   |       |     |   |
|-----------|---|-------|-----|---|
| X-C*-C*-X | 1 | 3.625 | 180 | 2 |
| X-C*-N*-X | 1 | 0.3   | 180 | 2 |
| X-C*-S-X  | 2 | 0.8   | 180 | 2 |
| X-C*-OS-X | 1 | 0.9   | 180 | 2 |
| X-C2-N2-X | 2 | 8.3   | 180 | 2 |
| X-C2-N3-X | 6 | 0     | 180 | 3 |
| X-C2-NH-X | 4 | 2.7   | 180 | 2 |
| X-C2-OS-X | 2 | 2.1   | 180 | 2 |
| X-CA-C*-X | 1 | 3.625 | 180 | 2 |
| X-CA-CA-X | 4 | 14.5  | 180 | 2 |
| X-CA-CC-X | 1 | 3.625 | 180 | 2 |
| X-CA-CR-X | 1 | 3.625 | 180 | 2 |
| X-CA-CV-X | 1 | 3.625 | 180 | 2 |
| X-CA-CZ-X | 1 | 0     | 180 | 2 |
| X-CA-NA-X | 4 | 1.2   | 180 | 2 |
| X-CA-NC-X | 2 | 9.6   | 180 | 2 |
| X-CA-NE-X | 2 | 0     | 180 | 3 |
| X-CA-NF-X | 2 | 0     | 180 | 3 |
| X-CA-NH-X | 4 | 4.2   | 180 | 2 |
| X-CA-NO-X | 4 | 2.4   | 180 | 2 |
| X-CA-N-X  | 4 | 1.8   | 180 | 2 |
| X-CA-OS-X | 2 | 1.8   | 180 | 2 |
| X-CA-S-X  | 2 | 0.8   | 180 | 2 |
| X-CA-SY-X | 6 | 7.8   | 180 | 2 |
| X-CB-CM-X | 1 | 3.625 | 180 | 2 |
| X-CB-S-X  | 2 | 0.8   | 180 | 2 |
| X-CB-SY-X | 6 | 7.6   | 180 | 2 |
| X-C-C*-X  | 1 | 3.625 | 180 | 2 |
| X-CC-C*-X | 1 | 3.625 | 180 | 2 |
| X-CM-CC-X | 1 | 3.625 | 180 | 2 |
| X-CC-OS-X | 1 | 0.9   | 180 | 2 |
| X-CC-S-X  | 2 | 2.2   | 180 | 2 |
| X-CC-C-X  | 1 | 3.625 | 180 | 2 |
| X-C-CT-X  | 6 | 0     | 180 | 2 |
| X-C-S-X   | 1 | 3.1   | 180 | 2 |
| X-CD-NC-X | 2 | 9.5   | 180 | 2 |
| X-CG-CA-X | 2 | 0     | 180 | 2 |
| X-CM-N2-X | 2 | 0     | 180 | 3 |
| X-CM-NC-X | 2 | 9.5   | 180 | 2 |

|             |     |      |     |    |
|-------------|-----|------|-----|----|
| X-CM-NH-X   | 4   | 4.2  | 180 | 2  |
| X-CM-NT-X   | 4   | 1.2  | 180 | 2  |
| X-CR-C*-X   | 4   | 16   | 180 | 2  |
| X-CR-N*-X   | 4   | 6.8  | 180 | 2  |
| X-CR-N-X    | 4   | 2.6  | 180 | 2  |
| X-CR-S-X    | 2   | 2.2  | 180 | 2  |
| X-CT-CA-X   | 6   | 0    | 0   | 3  |
| X-CT-CX-X   | 9   | 1.4  | 0   | 3  |
| X-CV-CT-X   | 1   | 0    | 0   | 2  |
| X-CV-OS-X   | 1   | 0.9  | 180 | 2  |
| X-CT-NA-X   | 6   | 0    | 0   | 2  |
| X-CT-NH-X   | 6   | 0    | 0   | 2  |
| X-CT-S6-X   | 9   | 1.3  | 0   | 3  |
| X-CT-SY-X   | 9   | 1.3  | 0   | 3  |
| X-CX-CA-X   | 6   | 0    | 0   | 2  |
| X-CX-CX-X   | 9   | 1.4  | 0   | 3  |
| X-CZ-CZ-X   | 1   | 0    | 180 | 2  |
| X-NA-CB-X   | 1   | 0.3  | 180 | 2  |
| X-NA-CM-X   | 1   | 0.3  | 180 | 2  |
| X-NA-N*-X   | 4   | 3.6  | 0   | 2  |
| X-NA-NC-X   | 2   | 9.6  | 180 | 2  |
| X-NB-N*-X   | 2   | 9.6  | 180 | 2  |
| X-NB-NB-X   | 1   | 4    | 180 | 2  |
| X-NB-SY-X   | 3   | 1.5  | 180 | -3 |
| X-NB-SY-X   | 3   | 20.4 | 180 | 1  |
| X-N-CC-X    | 4   | 6.6  | 180 | 2  |
| X-N-CD-X    | 4   | 6.6  | 180 | 2  |
| X-NE-NF-X   | 1   | 3    | 180 | -2 |
| X-NE-NF-X   | 1   | 2.8  | 0   | 1  |
| X-NH-SY-X   | 6   | 0.6  | 180 | 2  |
| X-N-NC-X    | 2   | 9.6  | 180 | 2  |
| X-NT-S6-X   | 6   | 18.8 | 0   | 2  |
| X-NT-SY-X   | 6   | 18.8 | 0   | 2  |
| IMPROPER    |     |      |     |    |
| C*-C-C*-CC  | 1.1 | 180  | 2   |    |
| C*-C-C*-N*  | 1.1 | 180  | 2   |    |
| CA-C-CA-S   | 1.1 | 180  | 2   |    |
| C*-C-CC-NA  | 1.1 | 180  | 2   |    |
| C-C-N-CA    | 1.1 | 180  | 2   |    |
| O-C-N-N     | 1.1 | 180  | 2   |    |
| C*-C*-C*-CI | 1.1 | 180  | 2   |    |
| C*-C*-C*-OS | 1.1 | 180  | 2   |    |
| C*-C*-C*-S  | 1.1 | 180  | 2   |    |
| CA-C2-NH-H  | 1.1 | 180  | 2   |    |
| C*-CA-C*-CT | 1.1 | 180  | 2   |    |
| C*-CA-C*-HA | 1.1 | 180  | 2   |    |
| Br-CA-CA-CA | 1.1 | 180  | 2   |    |
| CA-CA-CA-CC | 1.1 | 180  | 2   |    |
| CA-CA-CA-CG | 1.1 | 180  | 2   |    |
| CA-CA-CA-CM | 1.1 | 180  | 2   |    |
| CA-CA-CA-CR | 1.1 | 180  | 2   |    |
| CA-CA-CA-CX | 1.1 | 180  | 2   |    |
| CA-CA-CA-CZ | 1.1 | 180  | 2   |    |
| CA-CA-CA-F  | 1.1 | 180  | 2   |    |
| CA-CA-CA-NA | 1.1 | 180  | 2   |    |
| CA-CA-CA-NC | 1.1 | 180  | 2   |    |
| CA-CA-CA-NE | 1.1 | 180  | 2   |    |
| CA-CA-CA-NF | 1.1 | 180  | 2   |    |
| CA-CA-CA-NH | 1.1 | 180  | 2   |    |
| CA-CA-CA-NO | 1.1 | 180  | 2   |    |
| CA-CA-CA-S  | 1.1 | 180  | 2   |    |

|             |     |     |   |
|-------------|-----|-----|---|
| CA-CA-CA-SY | 1.1 | 180 | 2 |
| NC-CA-CA-C  | 1.1 | 180 | 2 |
| OH-CA-CA-CA | 1.1 | 180 | 2 |
| C*-CA-CB-CN | 1.1 | 180 | 2 |
| C-CA-CM-CB  | 1.1 | 180 | 2 |
| CA-CA-CM-CC | 1.1 | 180 | 2 |
| CA-CA-CM-CI | 1.1 | 180 | 2 |
| CA-CA-CM-CM | 1.1 | 180 | 2 |
| CA-CA-CM-CT | 1.1 | 180 | 2 |
| NC-CA-CT-CA | 1.1 | 180 | 2 |
| NC-CA-H4-CA | 1.1 | 180 | 2 |
| S-CA-H4-C*  | 1.1 | 180 | 2 |
| C-CA-N-CT   | 1.1 | 180 | 2 |
| CA-CA-NH-H  | 1.1 | 180 | 2 |
| CA-CA-NH-SY | 1.1 | 180 | 2 |
| NC-CA-NH-CA | 1.1 | 180 | 2 |
| S-CA-S-C*   | 1.1 | 180 | 2 |
| C*-CB-C*-CT | 1.1 | 180 | 2 |
| CA-CB-C*-HA | 1.1 | 180 | 2 |
| CA-CB-CA-CM | 1.1 | 180 | 2 |
| C-CB-CB-NB  | 1.1 | 180 | 2 |
| C*-CB-CB-NC | 1.1 | 180 | 2 |
| CA-CB-CB-CV | 1.1 | 180 | 2 |
| CA-CB-CB-NA | 1.1 | 180 | 2 |
| CA-CB-CB-NB | 1.1 | 180 | 2 |
| CA-CB-CB-OS | 1.1 | 180 | 2 |
| CA-CB-CB-S  | 1.1 | 180 | 2 |
| CA-CB-CB-SY | 1.1 | 180 | 2 |
| CA-CB-CN-NA | 1.1 | 180 | 2 |
| CA-CB-NA-CT | 1.1 | 180 | 2 |
| CB-CC-C*-HA | 1.1 | 180 | 2 |
| CA-CG-CA-NC | 1.1 | 180 | 2 |
| C*-CK-N*-CT | 1.1 | 180 | 2 |
| CC-CM-C*-N* | 1.1 | 180 | 2 |
| CA-CM-CA-N  | 1.1 | 180 | 2 |
| CM-CM-CA-N  | 1.1 | 180 | 2 |
| CM-CM-CA-N* | 1.1 | 180 | 2 |
| CB-CM-CB-NB | 1.1 | 180 | 2 |
| C*-CM-CC-NB | 1.1 | 180 | 2 |
| C-CM-CM-OS  | 1.1 | 180 | 2 |
| C*-CM-CM-NA | 1.1 | 180 | 2 |
| CA-CM-CM-CT | 1.1 | 180 | 2 |
| CM-CM-CM-NH | 1.1 | 180 | 2 |
| CA-CM-NH-H  | 1.1 | 180 | 2 |
| CM-CN-CB-NB | 1.1 | 180 | 2 |
| CA-CR-N*-NB | 1.1 | 180 | 2 |
| CB-CT-C*-CW | 1.1 | 180 | 2 |
| C*-CT-CA-S  | 1.1 | 180 | 2 |
| CA-CT-CA-NH | 1.1 | 180 | 2 |
| CC-CT-CA-OS | 1.1 | 180 | 2 |
| CA-CT-CC-NB | 1.1 | 180 | 2 |
| C*-CT-CV-NB | 1.1 | 180 | 2 |
| C-CT-N-NC   | 1.1 | 180 | 2 |
| CA-CT-N*-NA | 1.1 | 180 | 2 |
| CR-CT-N*-NB | 1.1 | 180 | 2 |
| CA-CT-NH-CT | 1.1 | 180 | 2 |
| CA-CT-NH-H  | 1.1 | 180 | 2 |
| CR-CV-C*-HA | 1.1 | 180 | 2 |
| CA-CX-CA-NC | 1.1 | 180 | 2 |
| CA-H-NA-N*  | 1.1 | 180 | 2 |
| CA-H-NA-NC  | 1.1 | 180 | 2 |
| CA-H-NH-H   | 1.1 | 180 | 2 |

|             |     |       |       |
|-------------|-----|-------|-------|
| CA-H-NH-SY  | 1.1 | 180   | 2     |
| CM-H-NH-H   | 1.1 | 180   | 2     |
| CM-H-NH-NA  | 1.1 | 180   | 2     |
| C*-H4-CA-N* | 1.1 | 180   | 2     |
| C*-H4-CA-NA | 1.1 | 180   | 2     |
| C*-H4-CA-S  | 1.1 | 180   | 2     |
| CA-H4-CA-NC | 1.1 | 180   | 2     |
| CA-H4-CA-S  | 1.1 | 180   | 2     |
| CM-H4-CA-NC | 1.1 | 180   | 2     |
| CV-H4-CA-S  | 1.1 | 180   | 2     |
| C*-H4-CW-NA | 1.1 | 180   | 2     |
| CA-N-CA-NC  | 1.1 | 180   | 2     |
| NH-N-CA-NC  | 1.1 | 180   | 2     |
| C*-N-CC-S   | 1.1 | 180   | 2     |
| CT-N-CD-NC  | 1.1 | 180   | 2     |
| CA-N*-CA-NC | 1.1 | 180   | 2     |
| CB-N*-CB-NC | 1.1 | 180   | 2     |
| H5-N*-CK-NB | 1.1 | 180   | 2     |
| C*-N*-CR-N  | 1.1 | 180   | 2     |
| CA-N2-CM-NH | 1.1 | 180   | 2     |
| N2-N3-C2-OS | 1.1 | 180   | 2     |
| CA-NA-CA-NC | 1.1 | 180   | 2     |
| CA-NA-CA-OH | 1.1 | 180   | 2     |
| H4-NA-CA-NC | 1.1 | 180   | 2     |
| NH-NA-CA-NA | 1.1 | 180   | 2     |
| NH-NA-CA-NC | 1.1 | 180   | 2     |
| CB-NA-CB-NC | 1.1 | 180   | 2     |
| CB-NA-CM-OS | 1.1 | 180   | 2     |
| CA-NA-CR-NB | 1.1 | 180   | 2     |
| H5-NA-CR-NB | 1.1 | 180   | 2     |
| CT-NB-CA-S  | 1.1 | 180   | 2     |
| CA-NB-CC-OS | 1.1 | 180   | 2     |
| N-NB-CR-S   | 1.1 | 180   | 2     |
| CB-NB-CV-OS | 1.1 | 180   | 2     |
| CA-NC-CA-OS | 1.1 | 180   | 2     |
| H5-NC-CA-NC | 1.1 | 180   | 2     |
| CA-NE-NE-NF | 1.1 | 180   | 2     |
| CA-NE-NF-NF | 1.1 | 180   | 2     |
| NH-NH-C2-NH | 1.1 | 180   | 2     |
| CA-NH-CA-NA | 1.1 | 180   | 2     |
| CA-NH-CA-NC | 1.1 | 180   | 2     |
| CA-NH-CA-NH | 1.1 | 180   | 2     |
| CM-NH-CA-NC | 1.1 | 180   | 2     |
| CA-NH-CM-NC | 1.1 | 180   | 2     |
| CA-NH-CM-NH | 1.1 | 180   | 2     |
| CM-NH-CM-NA | 1.1 | 180   | 2     |
| NH-NH-CM-NH | 1.1 | 180   | 2     |
| CA-O-C-OS   | 1.1 | 180   | 2     |
| CT-O-C-OS   | 1.1 | 180   | 2     |
| N-O-C-OS    | 1.1 | 180   | 2     |
| N-O-C-S     | 1.1 | 180   | 2     |
| CA-O-NO-O   | 1.1 | 180   | 2     |
| C*-S-CA-SY  | 1.1 | 180   | 2     |
| NB-S-CA-SY  | 1.1 | 180   | 2     |
| CB-S-CB-SY  | 1.1 | 180   | 2     |
| NONBOND     |     |       |       |
|             | C2  | 1.908 | 0.086 |
|             | CG  | 1.908 | 0.086 |
|             | CX  | 1.908 | 0.086 |
|             | N1  | 1.824 | 0.17  |
|             | NE  | 1.824 | 0.17  |

|    |       |      |
|----|-------|------|
| NF | 1.824 | 0.17 |
| NH | 1.824 | 0.17 |
| NO | 1.824 | 0.17 |
| S6 | 2     | 0.25 |
| SY | 2     | 0.25 |
