# Supplementary material for: Preference of Small Molecules for Local Minimum Conformations when Binding to Proteins
Source: PubMed Central journal article supplement (PMC1959118; doi:10.1371/journal.pone.0000820), 2007-09-05
Supplement: pone.0000820.s005.pdf [file pone.0000820.s005.pdf]

Table S5. The AMBER atom types and RESP charges of the 100 protein-bound ligands. The atom labels are shown in Figures S7–S13.

|      |    |        |      |    |        |      |    |        |      |    |        |
|------|----|--------|------|----|--------|------|----|--------|------|----|--------|
| 13gs |    |        | H19  | HC | 0.065  | N4   | NB | -0.652 | C2   | C  | 0.455  |
| N1   | NA | -0.009 | H20  | HC | 0.065  | C1   | CV | 1.277  | O1   | O  | -0.476 |
| H1   | H  | 0.300  | H21  | H  | 0.217  | C2   | CA | -0.616 | N2   | N  | -0.521 |
| C1   | CA | -0.151 | C9   | C* | -0.027 | C7   | CA | -0.021 | H14  | H  | 0.324  |
| H2   | H4 | 0.218  | C8   | C* | -0.112 | C6   | CA | -0.075 | C7   | CT | 0.109  |
| C2   | CA | -0.047 | H13  | HA | 0.169  | C5   | CA | -0.247 | C9   | CT | -0.067 |
| H3   | HA | 0.180  | C6   | CA | -0.089 | C4   | CA | -0.144 | C10  | CA | -0.026 |
| C3   | CA | 0.021  | S2   | S  | 0.148  | H1   | HA | 0.107  | C11  | CA | -0.127 |
| H14  | HA | 0.160  | C7   | CA | -0.187 | H2   | HA | 0.135  | C13  | CA | -0.165 |
| C4   | CA | -0.087 | S3   | SY | 1.168  | H3   | HA | 0.098  | C15  | CA | -0.092 |
| H4   | HA | 0.151  | O4   | O  | -0.612 | H4   | HA | 0.076  | C14  | CA | -0.165 |
| C5   | CA | 0.135  | O5   | O  | -0.612 | C3   | CA | 0.305  | C12  | CA | -0.127 |
| N2   | NH | -0.530 | N2   | NT | -0.979 | C8   | CA | -0.149 | H19  | HA | 0.133  |
| H5   | H  | 0.390  | H12  | H  | 0.379  | C13  | CA | -0.098 | H21  | HA | 0.155  |
| S1   | SY | 0.929  |      |    |        | C12  | CA | -0.164 | H22  | HA | 0.144  |
| O1   | O  | -0.485 |      |    |        | H7   | HA | 0.139  | H20  | HA | 0.155  |
| O2   | O  | -0.485 | 1a4k |    |        | H8   | HA | 0.123  | H18  | HA | 0.133  |
| C6   | CA | -0.005 | C1   | CT | -0.405 | C9   | CA | -0.098 | H16  | HC | 0.060  |
| C9   | CA | -0.168 | H1   | HC | 0.114  | H5   | HA | 0.123  | H17  | HC | 0.060  |
| H8   | HA | 0.171  | H2   | HC | 0.114  | C10  | CA | -0.164 | H15  | H1 | 0.098  |
| C10  | CA | -0.212 | H3   | HC | 0.114  | H6   | HA | 0.139  | C8   | C  | 0.576  |
| H9   | HA | 0.175  | C2   | C  | 0.687  | C11  | CA | -0.025 | O2   | O  | -0.600 |
| C7   | CA | -0.168 | O1   | O  | -0.547 | C14  | CT | 0.011  | N3   | N  | -0.463 |
| H6   | HA | 0.171  | N1   | N  | -0.429 | H9   | H1 | 0.060  | H23  | H  | 0.311  |
| C8   | CA | -0.212 | H4   | H  | 0.249  | H10  | H1 | 0.060  | C16  | CT | -0.051 |
| H7   | HA | 0.175  | C3   | CA | 0.107  | N5   | N* | 0.016  | H24  | H1 | 0.113  |
| C11  | CA | 0.370  | C6   | CA | -0.127 | C15  | CA | 0.228  | H25  | H1 | 0.113  |
| N3   | NE | -0.343 | H7   | HA | 0.141  | C16  | CT | -0.160 | C17  | CA | 0.031  |
| N4   | NF | 0.017  | C7   | CA | -0.234 | C17  | CT | 0.009  | C18  | CA | -0.174 |
| C12  | CA | 0.083  | H8   | HA | 0.179  | C18  | CT | 0.050  | H26  | HA | 0.161  |
| C13  | CA | -0.142 | C4   | CA | -0.127 | C19  | CT | 0.039  | C19  | CA | -0.209 |
| H10  | HA | 0.012  | H6   | HA | 0.141  | H17  | HC | -0.024 | H27  | HA | 0.174  |
| C14  | CA | 0.031  | C5   | CA | -0.234 | H18  | HC | -0.024 | C20  | CA | 0.310  |
| C15  | C  | 0.752  | H5   | HA | 0.179  | H19  | HC | -0.024 | F1   | F  | -0.187 |
| O3   | O  | -0.718 | C8   | CA | 0.149  | H15  | HC | -0.008 | C21  | CA | -0.209 |
| O4   | O  | -0.718 | N2   | N  | -0.039 | H16  | HC | -0.008 | H28  | HA | 0.174  |
| C16  | CA | 0.240  | C10  | C  | 0.403  | H13  | HC | -0.015 | C22  | CA | -0.174 |
| O5   | OH | -0.499 | O3   | O  | -0.518 | H14  | HC | -0.015 | H29  | HA | 0.161  |
| H11  | HO | 0.417  | C9   | C  | 0.386  | H11  | HC | 0.136  |      |    |        |
| C17  | CA | -0.363 | O2   | O  | -0.488 | H12  | HC | 0.136  |      |    |        |
| H12  | HA | 0.178  | C17  | CT | 0.004  | N6   | NC | -0.531 | 1a0e |    |        |
| C18  | CA | -0.059 | H19  | HC | 0.074  | C20  | CA | 0.307  | N5   | NH | -0.975 |
| H13  | HA | 0.125  | C11  | CT | -0.144 | C21  | CM | -0.267 | H7   | H  | 0.463  |
|      |    |        | H18  | HC | 0.077  | H20  | HA | 0.166  | H8   | H  | 0.463  |
|      |    |        | C12  | CT | 0.102  | C22  | CA | -0.155 | C4   | CA | 0.766  |
|      |    |        | C15  | CT | -0.116 | H21  | HA | 0.172  | N2   | NA | -0.330 |
| 1a42 |    |        | C16  | CT | -0.164 | C23  | CA | 0.288  | H20  | H  | 0.334  |
| C1   | CT | -0.058 | H13  | HC | 0.082  | O1   | OH | -0.619 | N1   | NC | -0.607 |
| H1   | HC | 0.026  | H14  | HC | 0.082  | H22  | HO | 0.444  | C3   | CM | 0.559  |
| H2   | HC | 0.026  | H15  | HC | 0.034  | C24  | CA | -0.313 | N3   | NH | -0.764 |
| H3   | HC | 0.026  | H16  | HC | 0.034  | H23  | HA | 0.178  | H1   | H  | 0.407  |
| C2   | CT | 0.176  | H17  | HC | 0.010  | C25  | CA | -0.047 | H2   | H  | 0.407  |
| H4   | H1 | 0.026  | C13  | CT | -0.116 | C26  | C  | 0.430  | C2   | CA | 0.033  |
| H5   | H1 | 0.026  | H11  | HC | 0.034  | O2   | O  | -0.556 | C1   | CA | 0.040  |
| O1   | OS | -0.450 | H12  | HC | 0.034  |      |    |        | C5   | CA | -0.271 |
| C3   | CT | 0.134  | C14  | CT | -0.164 |      |    |        | H3   | HA | 0.197  |
| H6   | H1 | 0.075  | H9   | HC | 0.082  | 1afq |    |        | C6   | CA | -0.136 |
| H7   | H1 | 0.075  | H10  | HC | 0.082  | C5   | CT | -0.099 | H4   | HA | 0.185  |
| C4   | CT | -0.045 | C18  | CT | 0.409  | H7   | HC | 0.034  | C7   | CB | 0.070  |
| H8   | H1 | 0.113  | N3   | N  | -0.849 | H8   | HC | 0.034  | C8   | CB | -0.007 |
| H9   | H1 | 0.113  | H20  | H  | 0.383  | H9   | HC | 0.034  | C9   | C* | -0.430 |
| N1   | NT | -0.271 | C19  | C  | 0.905  | C4   | CT | 0.107  | H5   | HA | 0.204  |
| S1   | SY | 0.759  | O4   | O  | -0.604 | C6   | CT | -0.099 | C10  | CA | -0.035 |
| O2   | O  | -0.439 | O5   | OS | -0.452 | H10  | HC | 0.034  | H6   | H4 | 0.202  |
| O3   | O  | -0.439 | C20  | CT | 0.062  | H11  | HC | 0.034  | N4   | N* | 0.085  |
| C5   | CT | -0.218 | H21  | H1 | 0.029  | H12  | HC | 0.034  | C11  | CT | -0.011 |
| H10  | H1 | 0.150  | H22  | H1 | 0.029  | H6   | HC | 0.065  | C14  | CT | -0.150 |
| H11  | H1 | 0.150  | C21  | C  | 0.855  | C3   | CT | -0.309 | C15  | CT | -0.046 |
| C10  | CT | 0.000  | O7   | O  | -0.807 | H4   | HC | 0.140  | H17  | HC | 0.024  |
| H14  | HP | 0.123  | O6   | O  | -0.807 | H5   | HC | 0.140  | H18  | HC | 0.024  |
| N3   | N3 | -0.008 |      |    |        | C1   | CT | -0.005 | H19  | HC | 0.024  |
| H15  | H  | 0.217  |      |    |        | N1   | N3 | -0.421 | H15  | HC | 0.074  |
| C11  | CT | 0.035  | 1a8t |    |        | H1   | H  | 0.339  | H16  | HC | 0.074  |
| H16  | HP | 0.074  | N1   | NB | -0.652 | H2   | H  | 0.339  | H9   | H1 | 0.103  |
| H17  | HP | 0.074  | N2   | NB | -0.192 | H13  | H  | 0.339  | C12  | CT | -0.150 |
| C12  | CT | -0.128 | N3   | NB | -0.192 | H3   | HP | 0.145  | H10  | HC | 0.074  |
| H18  | HC | 0.065  |      |    |        |      |    |        |      |    |        |



Local Minimum Conformation

|     |    |        |      |    |        |      |    |        |      |       |        |
|-----|----|--------|------|----|--------|------|----|--------|------|-------|--------|
| C10 | CA | 0.055  | C11  | CT | -0.034 | 1dib |    | H9     | HC   | 0.117 |        |
| C7  | C* | -0.180 | H11  | H1 | 0.060  | O1   | O  | -0.626 | H10  | HC    | 0.117  |
| S1  | S  | -0.090 | H12  | H1 | 0.060  | C1   | C  | 0.698  | C10  | CA    | -0.045 |
| C3  | CB | 0.030  | C12  | CT | -0.055 | N1   | N  | -0.322 | C11  | CA    | -0.256 |
| C2  | CA | -0.287 | H9   | HC | 0.033  | C2   | CA | -0.002 | H11  | HA    | 0.145  |
| H1  | HA | 0.212  | H10  | HC | 0.033  | C3   | CA | 0.251  | C16  | CA    | 0.301  |
| C1  | CA | 0.274  | C15  | CT | 0.066  | O2   | OH | -0.497 | O2   | OS    | -0.332 |
| O3  | OH | -0.560 | H17  | HC | 0.020  | H20  | HO | 0.504  | C17  | CT    | 0.007  |
| H37 | HO | 0.433  | C16  | CT | -0.104 | N2   | NA | -0.233 | H17  | H1    | 0.071  |
| C6  | CA | -0.152 | H18  | HC | 0.049  | H1   | H  | 0.327  | H18  | H1    | 0.071  |
| H3  | HA | 0.167  | H19  | HC | 0.049  | C4   | CA | 0.683  | H19  | H1    | 0.071  |
| C5  | CA | -0.208 | C17  | CA | 0.034  | N3   | NH | -0.943 | C15  | CA    | -0.225 |
| H2  | HA | 0.150  | C18  | CA | -0.143 | H2   | H  | 0.449  | H16  | HA    | 0.167  |
| C4  | CB | 0.068  | H20  | HA | 0.127  | H3   | H  | 0.449  | C14  | CA    | -0.266 |
| C8  | C* | 0.013  | C19  | CA | -0.173 | N4   | NC | -0.625 | H15  | HA    | 0.178  |
| C9  | CT | -0.032 | H21  | HA | 0.143  | C5   | CA | 0.468  | C12  | CA    | 0.238  |
| H4  | HC | 0.056  | C20  | CA | -0.105 | N5   | NH | -0.385 | O1   | OS    | -0.296 |
| H5  | HC | 0.056  | H22  | HA | 0.127  | H4   | H  | 0.314  | C13  | CT    | -0.104 |
| C17 | CA | 0.049  | C21  | CA | -0.173 | C6   | CT | 0.068  | H12  | H1    | 0.097  |
| C18 | CA | -0.161 | H23  | HA | 0.143  | H5   | H1 | 0.064  | H13  | H1    | 0.097  |
| C19 | CA | -0.149 | C22  | CA | -0.143 | H6   | H1 | 0.064  | H14  | H1    | 0.097  |
| H13 | HA | 0.157  | H24  | HA | 0.127  | C7   | CT | -0.007 |      |       |        |
| H12 | HA | 0.143  |      |    |        | H7   | H1 | 0.086  |      |       |        |
| C16 | CA | -0.161 |      |    |        | C8   | CT | -0.015 | 1efy |       |        |
| H11 | HA | 0.143  | 1d6v |    |        | H8   | H1 | 0.100  | C15  | CT    | -0.037 |
| C21 | CA | -0.149 | C4   | CA | -0.153 | H9   | H1 | 0.100  | H11  | H1    | 0.085  |
| H14 | HA | 0.157  | H3   | HA | 0.126  | N6   | N  | -0.188 | H12  | H1    | 0.085  |
| C20 | CA | 0.106  | C3   | CA | -0.145 | C9   | CA | -0.003 | H13  | H1    | 0.085  |
| O2  | OS | -0.325 | H2   | HA | 0.132  | C12  | CA | -0.143 | O2   | OS    | -0.320 |
| C22 | CT | 0.020  | C1   | CA | -0.141 | H12  | HA | 0.114  | C12  | CA    | 0.248  |
| H15 | H1 | 0.098  | H1   | HA | 0.125  | C13  | CA | -0.089 | C13  | CA    | -0.188 |
| H16 | H1 | 0.098  | C2   | CA | -0.145 | H13  | HA | 0.142  | C14  | CA    | -0.144 |
| C31 | CT | -0.087 | H5   | HA | 0.132  | C10  | CA | -0.143 | C11  | CA    | -0.171 |
| H33 | HP | 0.125  | C6   | CA | -0.153 | H11  | HA | 0.114  | H5   | HA    | 0.130  |
| H34 | HP | 0.125  | H4   | HA | 0.126  | C11  | CA | -0.089 | H6   | HA    | 0.159  |
| N2  | N3 | 0.019  | C5   | CA | -0.006 | H10  | HA | 0.142  | H7   | HA    | 0.146  |
| H39 | H  | 0.272  | C7   | CT | 0.014  | C14  | CA | -0.020 | C10  | CA    | -0.087 |
| C25 | CT | -0.056 | C12  | CT | -0.027 | C15  | C  | 0.468  | H4   | HA    | 0.094  |
| H21 | HP | 0.094  | C11  | CT | -0.057 | O3   | O  | -0.618 | C6   | CA    | -0.097 |
| H22 | HP | 0.094  | H16  | HC | 0.023  | N7   | N  | -0.216 | C2   | CR    | 0.423  |
| C24 | CT | -0.021 | H17  | HC | 0.023  | H14  | H  | 0.274  | N2   | NA    | -0.390 |
| H19 | HC | 0.061  | H12  | HC | 0.023  | C16  | CT | -0.051 | H10  | H     | 0.340  |
| H20 | HC | 0.061  | H13  | HC | 0.023  | C17  | C  | 0.844  | N1   | NB    | -0.547 |
| C23 | CT | -0.021 | H11  | HC | 0.038  | O4   | O  | -0.826 | C1   | CB    | 0.256  |
| H17 | HC | 0.061  | C8   | CT | -0.047 | O5   | O  | -0.826 | C3   | CN    | 0.120  |
| H18 | HC | 0.061  | H14  | HC | 0.065  | H15  | H1 | 0.051  | C4   | CA    | -0.264 |
| C26 | CT | -0.056 | H15  | HC | 0.065  | C18  | CT | -0.039 | H3   | HA    | 0.189  |
| H23 | HP | 0.094  | C9   | CT | 0.062  | H16  | HC | 0.019  | C8   | CA    | -0.181 |
| H24 | HP | 0.094  | O1   | OH | -0.656 | H17  | HC | 0.019  | H2   | HA    | 0.162  |
|     |    |        | H20  | HO | 0.424  | C19  | CT | -0.065 | C7   | CA    | -0.140 |
|     |    |        | H19  | H1 | 0.056  | H18  | HC | -0.020 | H1   | HA    | 0.158  |
|     |    |        | C10  | CT | -0.020 | H19  | HC | -0.020 | C5   | CM    | -0.133 |
|     |    |        | H18  | HC | 0.095  | C20  | C  | 0.776  | C9   | C     | 0.745  |
|     |    |        | C13  | CA | -0.001 | O7   | O  | -0.788 | O1   | O     | -0.606 |
|     |    |        | C18  | CA | -0.167 | O6   | O  | -0.788 | N3   | N     | -0.886 |
|     |    |        | C17  | CA | -0.112 |      |    |        | H8   | H     | 0.383  |
|     |    |        | H8   | HA | 0.138  |      |    |        | H9   | H     | 0.383  |
|     |    |        | H9   | HA | 0.123  | 1dlr |    |        |      |       |        |
|     |    |        | C14  | CA | -0.167 | C1   | CT | -0.011 | 1ela |       |        |
|     |    |        | H6   | HA | 0.123  | H1   | HC | 0.044  | N2   | N3    | -0.248 |
|     |    |        | C15  | CA | -0.112 | H2   | HC | 0.044  | H11  | H     | 0.277  |
|     |    |        | H7   | HA | 0.138  | H3   | HC | 0.044  | H12  | H     | 0.277  |
|     |    |        | C16  | CA | -0.051 | C2   | CA | -0.003 | H13  | H     | 0.277  |
|     |    |        | C19  | C  | 0.536  | C3   | CA | -0.046 | C8   | CT    | -0.009 |
|     |    |        | O2   | O  | -0.630 | C4   | CA | 0.497  | H9   | HP    | 0.076  |
|     |    |        | N1   | N  | -0.306 | N1   | NH | -0.696 | H10  | HP    | 0.076  |
|     |    |        | H10  | H  | 0.248  | H4   | H  | 0.384  | C7   | CT    | -0.033 |
|     |    |        | C20  | CT | -0.054 | H5   | H  | 0.384  | H7   | HC    | 0.043  |
|     |    |        | H21  | H1 | 0.054  | N2   | NC | -0.581 | H8   | HC    | 0.043  |
|     |    |        | H22  | H1 | 0.054  | C5   | CA | 0.698  | C6   | CT    | -0.016 |
|     |    |        | C21  | CT | 0.005  | N3   | NH | -0.914 | H5   | HC    | 0.037  |
|     |    |        | H23  | HC | -0.005 | H6   | H  | 0.452  | H6   | HC    | 0.037  |
|     |    |        | H24  | HC | -0.005 | H7   | H  | 0.452  | C5   | CT    | -0.075 |
|     |    |        | C22  | CT | -0.055 | N4   | NA | -0.302 | H3   | HC    | 0.053  |
|     |    |        | H25  | HC | -0.012 | H20  | H  | 0.323  | H4   | HC    | 0.053  |
|     |    |        | H26  | HC | -0.012 | C6   | CA | 0.343  | C3   | CT    | 0.112  |
|     |    |        | C23  | C  | 0.825  | N5   | NC | -0.570 | N1   | N     | -0.296 |
|     |    |        | O4   | O  | -0.779 | C7   | CA | 0.337  | C1   | C     | 0.469  |
|     |    |        | O3   | O  | -0.779 | H8   | H4 | 0.109  | O1   | O     | -0.493 |
|     |    |        |      |    |        | C8   | CM | -0.122 | C2   | CT    | 0.354  |
|     |    |        |      |    |        | C9   | CT | -0.119 |      |       |        |

## Local Minimum Conformation

|      |    |        |      |    |        |      |    |        |      |    |        |
|------|----|--------|------|----|--------|------|----|--------|------|----|--------|
| F1   | F  | -0.130 | H13  | H  | 0.415  | S1   | SY | 0.927  | F1   | F  | -0.206 |
| F2   | F  | -0.130 | H14  | H  | 0.415  | O1   | O  | -0.536 | C1   | CA | 0.146  |
| F3   | F  | -0.130 | N5   | NH | -0.892 | O2   | O  | -0.536 | C2   | CA | -0.184 |
| H1   | H  | 0.225  | H15  | H  | 0.415  | C1   | CA | 0.024  | H25  | HA | 0.156  |
| H2   | H1 | 0.076  | H16  | H  | 0.415  | C2   | CA | -0.148 | C3   | CA | -0.011 |
| C4   | C  | 0.287  | H17  | H  | 0.366  | H1   | HA | 0.161  | C7   | C  | 0.807  |
| O2   | O  | -0.531 | H18  | H1 | 0.010  | C3   | CA | -0.195 | O3   | O  | -0.781 |
| N3   | N  | -0.019 | H19  | H1 | 0.010  | H2   | HA | 0.158  | O4   | O  | -0.781 |
| C13  | CT | 0.016  | H20  | HC | 0.031  | C4   | CA | 0.144  | C4   | CA | -0.203 |
| C12  | CT | -0.056 | H21  | HC | 0.031  | C7   | CT | -0.198 | H24  | HA | 0.153  |
| C11  | CT | -0.081 | H22  | HC | 0.022  | H5   | HC | 0.078  | C5   | CA | -0.168 |
| H15  | HC | 0.072  | H23  | HC | 0.022  | H6   | HC | 0.078  | H23  | HA | 0.163  |
| H16  | HC | 0.072  | H24  | H1 | 0.069  | H7   | HC | 0.078  | C6   | CA | -0.021 |
| H17  | HC | 0.057  | C16  | C  | 0.437  | C5   | CA | -0.195 | N1   | N  | -0.170 |
| H18  | HC | 0.057  | O3   | O  | -0.550 | H3   | HA | 0.158  | H17  | H  | 0.233  |
| H19  | H1 | 0.049  | N6   | N  | -0.148 | C6   | CA | -0.148 | C23  | C  | 0.435  |
| H20  | H1 | 0.049  | C17  | CT | -0.282 | H4   | HA | 0.161  | O2   | O  | -0.555 |
| C9   | CT | -0.026 | C18  | C  | 0.701  |      |    |        | C22  | CT | 0.112  |
| H14  | H1 | 0.090  | O4   | O  | -0.647 |      |    |        | O1   | OH | -0.643 |
| C10  | C  | 0.454  | O5   | O  | -0.647 | 1eve |    |        | H18  | HO | 0.423  |
| O3   | O  | -0.544 | H25  | H1 | 0.155  | C9   | CT | -0.046 | H19  | H1 | 0.085  |
| N4   | N  | -0.408 | C19  | CT | -0.068 | H28  | HC | 0.041  | C9   | CA | 0.025  |
| H22  | H  | 0.316  | H26  | HC | 0.046  | H29  | HC | 0.041  | C10  | CA | -0.088 |
| C14  | CA | 0.083  | H27  | HC | 0.046  | C4   | CA | -0.101 | C11  | CA | -0.319 |
| C20  | CA | -0.086 | C20  | CT | 0.159  | C3   | CA | -0.149 | H20  | HA | 0.179  |
| C19  | CA | -0.268 | C21  | CT | -0.225 | H22  | HA | 0.155  | H21  | HA | 0.146  |
| H25  | HA | 0.169  | H28  | HC | 0.047  | C2   | CA | 0.156  | C8   | CA | -0.189 |
| H26  | HA | 0.159  | H29  | HC | 0.047  | O3   | OS | -0.340 | H22  | HA | 0.139  |
| C16  | CA | -0.086 | H30  | HC | 0.047  | C24  | CT | -0.001 | C17  | CA | -0.043 |
| H23  | HA | 0.159  | H31  | HC | 0.040  | H17  | H1 | 0.076  | C12  | CA | 0.004  |
| C17  | CA | -0.268 | C22  | CT | -0.135 | H18  | H1 | 0.076  | C13  | CT | 0.291  |
| H24  | HA | 0.169  | H32  | HC | 0.040  | H19  | H1 | 0.076  | C20  | CT | -0.184 |
| C18  | CA | 0.030  | H33  | HC | 0.040  | C1   | CA | 0.208  | H7   | HC | 0.030  |
| C15  | CT | 0.247  | C23  | CT | 0.011  | O2   | OS | -0.229 | H8   | HC | 0.030  |
| C22  | CT | -0.244 | H34  | H1 | 0.067  | C23  | CT | -0.087 | H9   | HC | 0.030  |
| H30  | HC | 0.068  | H35  | H1 | 0.067  | H14  | H1 | 0.093  | C21  | CT | -0.184 |
| H31  | HC | 0.068  |      |    |        | H15  | H1 | 0.093  | H10  | HC | 0.030  |
| H32  | HC | 0.068  |      |    |        | H16  | H1 | 0.093  | H11  | HC | 0.030  |
| H21  | HC | -0.009 | 1ett |    |        | C6   | CA | -0.217 | H12  | HC | 0.030  |
| C21  | CT | -0.244 | N2   | NH | -0.787 | H21  | HA | 0.168  | C14  | CT | -0.030 |
| H27  | HC | 0.068  | H9   | H  | 0.431  | C5   | CA | -0.110 | H13  | HC | 0.013  |
| H28  | HC | 0.068  | H10  | H  | 0.431  | C7   | C  | 0.514  | H14  | HC | 0.013  |
| H29  | HC | 0.068  | C17  | CA | 0.668  | O1   | O  | -0.522 | C15  | CT | -0.127 |
|      |    |        | N3   | NH | -0.787 | C8   | CT | 0.016  | H15  | HC | 0.011  |
|      |    |        | H11  | H  | 0.431  | H20  | HC | 0.032  | H16  | HC | 0.011  |
|      |    |        | H12  | H  | 0.431  | C10  | CT | -0.090 | C16  | CT | 0.286  |
| 1etr |    |        | C16  | CA | -0.090 | H12  | HC | 0.057  | C19  | CT | -0.177 |
| C1   | CT | -0.077 | C15  | CA | -0.154 | H13  | HC | 0.057  | H4   | HC | 0.038  |
| H1   | HC | 0.043  | C13  | CA | -0.086 | C11  | CT | 0.022  | H5   | HC | 0.038  |
| H2   | HC | 0.043  | H17  | HA | 0.156  | C15  | CT | 0.001  | H6   | HC | 0.038  |
| C2   | CT | 0.220  | H19  | HA | 0.153  | C14  | CT | -0.096 | C18  | CT | -0.177 |
| C3   | CT | -0.273 | C14  | CA | -0.154 | H10  | HP | 0.111  | H1   | HC | 0.038  |
| H3   | HC | 0.061  | H18  | HA | 0.153  | H11  | HP | 0.111  | H2   | HC | 0.038  |
| H4   | HC | 0.061  | C12  | CA | -0.086 | H8   | HC | 0.035  | H3   | HC | 0.038  |
| H5   | HC | 0.061  | H16  | HA | 0.156  | H9   | HC | 0.035  |      |    |        |
| H6   | HC | -0.007 | C11  | CA | 0.011  | H7   | HC | 0.026  |      |    |        |
| C4   | CT | -0.111 | C10  | CT | 0.020  | C12  | CT | 0.001  | 1ezq |    |        |
| H7   | H1 | 0.072  | H14  | HC | 0.043  | H5   | HC | 0.035  | C20  | CA | -0.005 |
| H36  | H1 | 0.072  | H15  | HC | 0.043  | H6   | HC | 0.035  | H9   | HA | 0.084  |
| N1   | NH | -0.226 | C8   | CT | 0.011  | C13  | CT | -0.096 | C21  | CA | -0.182 |
| H8   | H  | 0.252  | C9   | C  | 0.426  | H3   | HP | 0.111  | C26  | CM | 0.685  |
| C5   | CA | 0.027  | O3   | O  | -0.522 | H4   | HP | 0.111  | N3   | NH | -0.779 |
| C6   | CA | -0.003 | N4   | N  | -0.220 | N1   | N3 | -0.017 | H14  | H  | 0.427  |
| C7   | CA | -0.143 | C18  | CT | -0.016 | H30  | H  | 0.259  | H15  | H  | 0.427  |
| H9   | HA | 0.150  | C19  | CT | 0.042  | C16  | CT | -0.088 | N4   | NH | -0.779 |
| C8   | CA | -0.258 | C20  | CT | -0.030 | H1   | HP | 0.115  | H16  | H  | 0.427  |
| H10  | HA | 0.165  | C21  | CT | 0.042  | H2   | HP | 0.115  | H17  | H  | 0.427  |
| C9   | CA | -0.092 | C22  | CT | -0.016 | C17  | CA | 0.009  | C22  | CA | -0.106 |
| H11  | HA | 0.164  | H28  | H1 | 0.054  | C18  | CA | -0.128 | H10  | HA | 0.143  |
| C10  | CA | -0.010 | H29  | H1 | 0.054  | H23  | HA | 0.133  | C23  | CA | -0.141 |
| S1   | SY | 0.758  | H26  | HC | 0.015  | C19  | CA | -0.160 | H11  | HA | 0.174  |
| O1   | O  | -0.497 | H27  | HC | 0.015  | H24  | HA | 0.167  | C24  | CA | -0.095 |
| O2   | O  | -0.497 | H24  | HC | 0.017  | C20  | CA | -0.071 | H12  | HA | 0.173  |
| N2   | NT | -0.384 | H25  | HC | 0.017  | H25  | HA | 0.155  | C25  | CA | 0.004  |
| H12  | H  | 0.228  | H22  | HC | 0.015  | C21  | CA | -0.160 | C18  | CT | -0.019 |
| C11  | CT | 0.061  | H23  | HC | 0.015  | H26  | HA | 0.167  | H21  | HC | 0.031  |
| C12  | CT | -0.033 | H20  | H1 | 0.054  | C22  | CA | -0.128 | H22  | HC | 0.031  |
| C13  | CT | -0.010 | H21  | H1 | 0.054  | H27  | HA | 0.133  | C16  | CT | -0.044 |
| C14  | CT | 0.313  | H13  | H1 | 0.076  |      |    |        | C17  | C  | 0.823  |
| N3   | NH | -0.704 | N1   | NT | -0.371 |      |    |        | O1   | OS | -0.420 |
| C15  | CM | 0.883  | H8   | H  | 0.282  | 1exa |    |        | C27  | CT | -0.025 |
| N4   | NH | -0.892 |      |    |        |      |    |        |      |    |        |

## Local Minimum Conformation

|      |    |        |      |    |        |      |    |        |      |    |        |
|------|----|--------|------|----|--------|------|----|--------|------|----|--------|
| H18  | H1 | 0.096  | H2   | HA | 0.151  | C6   | CA | -0.074 | H16  | HC | 0.030  |
| H19  | H1 | 0.096  | C2   | CA | -0.230 | H4   | HA | 0.140  | C13  | CT | 0.028  |
| H20  | H1 | 0.096  | H3   | HA | 0.166  | C5   | CA | -0.025 | C17  | C  | 0.788  |
| O2   | O  | -0.587 | C3   | CA | 0.153  | S1   | SY | 0.791  | O5   | O  | -0.795 |
| H23  | HC | 0.013  | C4   | CA | -0.036 | O1   | O  | -0.563 | O6   | O  | -0.795 |
| C14  | CT | 0.033  | C9   | CA | 0.644  | O2   | O  | -0.563 | H14  | H1 | 0.069  |
| C15  | CT | -0.317 | N5   | NH | -0.906 | N1   | NT | 0.021  | N3   | N  | -0.582 |
| H25  | HC | 0.111  | H16  | H  | 0.375  | C8   | CT | -0.083 | H13  | H  | 0.308  |
| H26  | HC | 0.111  | H17  | H  | 0.375  | H8   | H1 | 0.024  | C12  | C  | 0.744  |
| H27  | HC | 0.111  | N1   | NC | -0.565 | H9   | H1 | 0.024  | O4   | O  | -0.650 |
| H24  | H1 | 0.084  | C8   | CA | 0.090  | C9   | CT | -0.002 | C9   | CA | -0.086 |
| N1   | N  | -0.390 | H6   | H4 | 0.129  | H10  | HC | 0.026  | C10  | CA | -0.135 |
| H13  | H  | 0.252  | C7   | CA | -0.306 | H11  | HC | 0.026  | C11  | CA | -0.119 |
| C13  | C  | 0.636  | H5   | HA | 0.142  | C10  | CT | -0.031 | H12  | HA | 0.139  |
| O3   | O  | -0.559 |      |    |        | H12  | HC | -0.005 | H11  | HA | 0.152  |
| C8   | CA | -0.075 |      |    |        | H13  | HC | -0.005 | C8   | CA | -0.135 |
| C9   | CA | -0.158 | 1f0t |    |        | C11  | CT | 0.043  | H10  | HA | 0.152  |
| C10  | CA | -0.108 | S1   | S  | -0.053 | H14  | H1 | 0.039  | C7   | CA | -0.119 |
| H5   | HA | 0.134  | C9   | CB | -0.014 | C12  | C  | 0.763  | H9   | HA | 0.139  |
| H6   | HA | 0.154  | C10  | CA | -0.081 | O4   | O  | -0.763 | C6   | CA | 0.010  |
| C7   | CA | -0.158 | H10  | HA | 0.206  | O3   | O  | -0.763 | S1   | SY | 0.832  |
| H7   | HA | 0.154  | C11  | CA | -0.323 |      |    |        | O2   | O  | -0.523 |
| C12  | CA | -0.108 | H11  | HA | 0.173  |      |    |        | O3   | O  | -0.523 |
| H8   | HA | 0.134  | C12  | CA | 0.335  | 1f4f |    |        | N1   | NT | -0.298 |
| C11  | CA | 0.007  | H12  | H4 | 0.085  | O8   | O  | -0.857 | C2   | CT | -0.003 |
| C2   | CA | 0.023  | N3   | NC | -0.592 | C16  | C  | 0.823  | H3   | H1 | 0.063  |
| C1   | CA | -0.133 | C13  | CB | 0.395  | O9   | O  | -0.857 | H4   | H1 | 0.063  |
| H4   | HA | 0.138  | C14  | C* | -0.018 | C15  | CT | -0.049 | C1   | CT | -0.047 |
| C6   | CA | -0.062 | H13  | HA | 0.167  | H16  | HC | -0.015 | H1   | HC | 0.035  |
| C19  | CT | 0.012  | C15  | CA | -0.242 | H17  | HC | -0.015 | H2   | HC | 0.035  |
| N2   | N3 | -0.353 | S2   | SY | 1.009  | C14  | CT | 0.068  | C4   | CT | -0.003 |
| H30  | H  | 0.324  | O2   | O  | -0.497 | H14  | HC | -0.002 | H6   | HC | 0.020  |
| H31  | H  | 0.324  | O3   | O  | -0.497 | H15  | HC | -0.002 | H7   | HC | 0.020  |
| H32  | H  | 0.324  | N5   | NT | -0.787 | C13  | CT | 0.033  | C3   | CT | 0.063  |
| H28  | HP | 0.130  | H19  | H  | 0.457  | C17  | C  | 0.774  | H5   | H1 | 0.030  |
| H29  | HP | 0.130  | C17  | CT | 0.211  | O6   | O  | -0.793 | C5   | C  | 0.598  |
| C5   | CA | -0.136 | C18  | CT | -0.138 | O7   | O  | -0.793 | O1   | O  | -0.603 |
| H1   | HA | 0.161  | C19  | CT | -0.022 | H13  | H1 | 0.047  | N2   | N  | -0.494 |
| C4   | CA | -0.189 | H17  | H1 | 0.078  | N2   | N  | -0.485 | H8   | H  | 0.290  |
| H2   | HA | 0.186  | H18  | H1 | 0.078  | H12  | H  | 0.268  | C18  | CT | 0.096  |
| C3   | CA | -0.051 | H15  | HC | 0.085  | C12  | C  | 0.572  | H19  | H1 | 0.041  |
| H3   | HA | 0.143  | H16  | HC | 0.085  | O5   | O  | -0.623 | H20  | H1 | 0.041  |
|      |    |        | H14  | H1 | 0.128  | C9   | CA | 0.008  | C19  | CT | -0.043 |
|      |    |        | C16  | C  | 0.507  | C10  | CA | -0.160 | H21  | HC | -0.018 |
|      |    |        | O4   | O  | -0.539 | C11  | CA | -0.094 | H22  | HC | -0.018 |
| 1f0r |    |        | N4   | N  | -0.253 | H11  | HA | 0.149  | C20  | C  | 0.821  |
| S1   | S  | -0.051 | C8   | CT | -0.136 | H10  | HA | 0.146  | O10  | O  | -0.828 |
| C10  | CB | -0.071 | H7   | H1 | 0.145  | C8   | CA | -0.160 | O9   | O  | -0.828 |
| C11  | CA | -0.054 | H8   | H1 | 0.145  | H9   | HA | 0.146  |      |    |        |
| H7   | HA | 0.196  | C4   | CA | 0.019  | C7   | CA | -0.094 |      |    |        |
| C12  | CA | -0.334 | C5   | CA | -0.140 | H8   | HA | 0.149  | 1fcx |    |        |
| H8   | HA | 0.161  | H3   | HA | 0.198  | C6   | CA | 0.057  | C16  | CT | -0.197 |
| C13  | CA | 0.341  | C3   | CA | 0.327  | S1   | SY | 0.568  | H14  | HC | 0.035  |
| H9   | H4 | 0.066  | O1   | OH | -0.566 | O3   | O  | -0.505 | H15  | HC | 0.035  |
| N2   | NC | -0.592 | H9   | HO | 0.460  | O4   | O  | -0.505 | H16  | HC | 0.035  |
| C14  | CB | 0.430  | C2   | CA | -0.268 | N1   | NT | -0.245 | C12  | CT | 0.310  |
| C15  | C* | -0.110 | H2   | HA | 0.178  | C2   | CT | -0.114 | C17  | CT | -0.197 |
| H10  | HA | 0.166  | C1   | CA | -0.100 | H3   | H1 | 0.103  | H17  | HC | 0.035  |
| C16  | CA | -0.132 | H1   | HA | 0.159  | H4   | H1 | 0.103  | H18  | HC | 0.035  |
| S2   | SY | 1.059  | C6   | CA | -0.200 | C1   | CT | -0.037 | H19  | HC | 0.035  |
| O1   | O  | -0.526 | C7   | CM | 0.756  | H1   | HC | 0.027  | C11  | CT | -0.054 |
| O2   | O  | -0.526 | N2   | NH | -0.821 | H2   | HC | 0.027  | H6   | HC | 0.014  |
| N4   | NT | -0.673 | H6   | H  | 0.430  | C4   | CT | 0.078  | H7   | HC | 0.014  |
| H1   | H  | 0.373  | H20  | H  | 0.430  | H6   | HC | -0.025 | C10  | CT | -0.085 |
| C18  | CT | 0.126  | N1   | NH | -0.821 | H7   | HC | -0.025 | H4   | HC | 0.008  |
| C19  | CT | -0.076 | H4   | H  | 0.430  | C3   | CT | 0.054  | H5   | HC | 0.008  |
| C20  | CT | -0.171 | H5   | H  | 0.430  | H5   | H1 | 0.057  | C9   | CT | 0.278  |
| H14  | H1 | 0.094  |      |    |        | C5   | C  | 0.768  | C14  | CT | -0.192 |
| H15  | H1 | 0.094  |      |    |        | O2   | O  | -0.785 | H8   | HC | 0.038  |
| H12  | HC | 0.091  |      |    |        | O1   | O  | -0.785 | H9   | HC | 0.038  |
| H13  | HC | 0.091  | 1f4e |    |        |      |    |        | H10  | HC | 0.038  |
| H11  | H1 | 0.114  | C4   | CA | -0.074 |      |    |        | C15  | CT | -0.192 |
| C17  | C  | 0.420  | H3   | HA | 0.140  | 1f4g |    |        | H11  | HC | 0.038  |
| O3   | O  | -0.538 | C3   | CA | -0.269 | O7   | O  | -0.843 | H12  | HC | 0.038  |
| N3   | N  | -0.088 | H2   | HA | 0.151  | C16  | C  | 0.821  | H13  | HC | 0.038  |
| C21  | CT | -0.040 | C2   | CA | 0.163  | O8   | O  | -0.843 | C8   | CA | -0.036 |
| H18  | H1 | 0.077  | C7   | CT | -0.126 | C15  | CT | -0.070 | C23  | CA | -0.231 |
| H19  | H1 | 0.077  | H5   | HC | 0.038  | H17  | HC | -0.015 | H23  | HA | 0.141  |
| C6   | CA | 0.083  | H6   | HC | 0.038  | H18  | HC | -0.015 | C13  | CA | -0.011 |
| C5   | CA | -0.243 | H7   | HC | 0.038  | C14  | CT | -0.030 | C24  | CA | -0.297 |
| H4   | HA | 0.168  | C1   | CA | -0.269 | H15  | HC | 0.030  | H24  | HA | 0.178  |
| C1   | CA | -0.184 | H1   | HA | 0.151  |      |    |        |      |    |        |

## Local Minimum Conformation

|      |    |        |  |      |      |        |    |        |    |        |      |       |        |
|------|----|--------|--|------|------|--------|----|--------|----|--------|------|-------|--------|
| C25  | CA | -0.078 |  |      |      | H12    | HC | 0.027  |    | C11    | CT   | 0.252 |        |
| H25  | HA | 0.132  |  |      |      | C15    | CT | -0.005 |    | H9     | H1   | 0.007 |        |
| C22  | CA | 0.002  |  |      | 1fjs | H13    | HC | 0.034  |    | H10    | H1   | 0.007 |        |
| C26  | CT | 0.172  |  | O1   | OH   | -0.574 |    | H14    | HC | 0.034  | C12  | CT    | -0.229 |
| O3   | OH | -0.669 |  | H24  | HO   | 0.454  |    | C14    | CT | 0.058  | H11  | H1    | 0.143  |
| H27  | HO | 0.423  |  | C1   | CA   | 0.339  |    | C23    | CA | 0.034  | H12  | H1    | 0.143  |
| H26  | H1 | 0.062  |  | C2   | CA   | -0.259 |    | C24    | CA | -0.096 | N2   | NH    | -0.171 |
| C19  | CA | 0.059  |  | H1   | HA   | 0.162  |    | C25    | CA | -0.175 | C13  | CT    | -0.128 |
| C18  | CA | -0.136 |  | C3   | CA   | -0.151 |    | C26    | CA | -0.113 | H13  | H1    | 0.113  |
| H20  | HA | 0.142  |  | H2   | HA   | 0.148  |    | C27    | CA | -0.175 | H14  | H1    | 0.113  |
| C5   | CA | 0.027  |  | C4   | CA   | -0.192 |    | C28    | CA | -0.096 | H15  | H1    | 0.113  |
| C4   | CA | -0.272 |  | C5   | CM   | 0.772  |    | H6     | HA | 0.112  | C14  | CA    | 0.272  |
| H2   | HA | 0.129  |  | N1   | NH   | -0.833 |    | H7     | HA | 0.146  | N3   | NA    | -0.095 |
| C3   | CA | -0.093 |  | H3   | H    | 0.405  |    | H8     | HA | 0.134  | H20  | H     | 0.318  |
| H1   | HA | 0.125  |  | H4   | H    | 0.405  |    | H9     | HA | 0.146  | C15  | CA    | -0.157 |
| C2   | CA | 0.002  |  | N2   | NH   | -0.833 |    | H10    | HA | 0.112  | H16  | H4    | 0.225  |
| C1   | C  | 0.783  |  | H5   | H    | 0.405  |    | H15    | H1 | 0.106  | C16  | CA    | -0.114 |
| O1   | O  | -0.777 |  | H6   | H    | 0.405  |    | O1     | OS | -0.383 | H17  | HA    | 0.180  |
| O2   | O  | -0.777 |  | C6   | CA   | -0.091 |    | C1     | C  | 0.728  | C17  | CA    | -0.045 |
| C7   | CA | -0.229 |  | H7   | HA   | 0.197  |    | O2     | O  | -0.557 | H18  | HA    | 0.196  |
| H3   | HA | 0.135  |  | C7   | CA   | 0.118  |    | C2     | CT | -0.019 | C18  | CA    | -0.170 |
| C6   | CA | 0.124  |  | O2   | OS   | -0.258 |    | H16    | H1 | 0.074  | H19  | HA    | 0.153  |
| C21  | CA | -0.199 |  | C8   | CA   | 0.300  |    | C3     | CT | -0.035 |      |       |        |
| H22  | HA | 0.149  |  | C9   | CA   | 0.194  |    | H17    | HC | 0.028  |      |       |        |
| C20  | CA | -0.264 |  | F1   | F    | -0.197 |    | H18    | HC | 0.028  | 1fm9 |       |        |
| H21  | HA | 0.134  |  | C10  | CA   | 0.068  |    | C4     | CT | -0.032 | C30  | CA    | -0.145 |
|      |    |        |  | N4   | NH   | -0.192 |    | H19    | HC | 0.018  | C31  | CA    | -0.083 |
|      |    |        |  | C11  | CT   | -0.216 |    | H20    | HC | 0.018  | H25  | HA    | 0.110  |
| 1fcz |    |        |  | C12  | C    | 0.866  |    | C5     | CT | 0.014  | H24  | HA    | 0.138  |
| C1   | CA | -0.156 |  | O3   | O    | -0.721 |    | H21    | HC | 0.019  | C29  | CA    | -0.161 |
| H1   | HA | 0.118  |  | O4   | O    | -0.721 |    | H22    | HC | 0.019  | H23  | HA    | 0.142  |
| C2   | CA | -0.178 |  | H8   | H1   | 0.104  |    | C6     | CT | -0.055 | C28  | CA    | -0.145 |
| H2   | HA | 0.139  |  | H9   | H1   | 0.104  |    | H23    | H1 | 0.054  | H22  | HA    | 0.138  |
| C3   | CA | 0.042  |  | C13  | CT   | -0.216 |    | H24    | H1 | 0.054  | C27  | CA    | -0.083 |
| C4   | C  | 0.792  |  | H10  | H1   | 0.106  |    | N1     | N  | -0.105 | H21  | HA    | 0.110  |
| O1   | O  | -0.777 |  | H11  | H1   | 0.106  |    | C7     | C  | 0.316  | C26  | CA    | -0.060 |
| O2   | O  | -0.777 |  | H12  | H1   | 0.106  |    | O3     | O  | -0.499 | C22  | CC    | 0.522  |
| C5   | CA | -0.178 |  | C14  | CA   | 0.070  |    | C8     | C  | 0.532  | N2   | NB    | -0.570 |
| H3   | HA | 0.139  |  | F2   | F    | -0.151 |    | O4     | O  | -0.510 | O3   | OS    | -0.276 |
| C6   | CA | -0.156 |  | N3   | NC   | -0.437 |    | C9     | CT | 0.209  | C24  | CA    | 0.110  |
| H4   | HA | 0.118  |  | C15  | CA   | 0.373  |    | C12    | CT | -0.159 | C25  | CT    | -0.212 |
| C7   | CA | 0.018  |  | O5   | OS   | -0.323 |    | H25    | HC | 0.033  | H18  | HC    | 0.082  |
| C8   | CM | -0.040 |  | C16  | CA   | 0.187  |    | H26    | HC | 0.033  | H19  | HC    | 0.082  |
| H24  | HA | 0.102  |  | C18  | CA   | -0.151 |    | H27    | HC | 0.033  | H20  | HC    | 0.082  |
| C9   | CM | -0.362 |  | H14  | HA   | 0.148  |    | C13    | CT | -0.159 | C23  | CC    | 0.150  |
| H25  | HA | 0.171  |  | C19  | CA   | -0.155 |    | H28    | HC | 0.033  | C33  | CT    | 0.028  |
| C10  | C  | 0.605  |  | H15  | HA   | 0.146  |    | H29    | HC | 0.033  | H28  | HC    | 0.005  |
| O3   | O  | -0.572 |  | C20  | CA   | -0.110 |    | H30    | HC | 0.033  | H29  | HC    | 0.005  |
| C11  | CA | -0.030 |  | H16  | HA   | 0.134  |    | C10    | CT | -0.051 | C32  | CT    | 0.070  |
| C12  | CA | -0.263 |  | C17  | CA   | 0.005  |    | H31    | HC | 0.023  | H26  | H1    | 0.058  |
| H5   | HA | 0.192  |  | H13  | HA   | 0.072  |    | H32    | HC | 0.023  | H27  | H1    | 0.058  |
| C13  | CA | -0.006 |  | C21  | CA   | -0.253 |    | C11    | CT | -0.084 | O1   | OS    | -0.219 |
| C14  | CT | 0.297  |  | C22  | CM   | 0.722  |    | H33    | HC | 0.017  | C8   | CA    | 0.071  |
| C15  | CT | -0.210 |  | N5   | NH   | -0.359 |    | H34    | HC | 0.017  | C7   | CA    | -0.149 |
| H6   | HC | 0.042  |  | C23  | CT   | 0.016  |    | H35    | HC | 0.017  | C5   | CA    | -0.130 |
| H7   | HC | 0.042  |  | H17  | H1   | 0.044  |    |        |    |        | H6   | HA    | 0.115  |
| H8   | HC | 0.042  |  | H18  | H1   | 0.044  |    |        |    |        | H8   | HA    | 0.106  |
| C16  | CT | -0.210 |  | H19  | H1   | 0.044  |    |        |    |        | C6   | CA    | -0.149 |
| H9   | HC | 0.042  |  | C24  | CT   | 0.019  |    | 1fm6   |    |        | H7   | HA    | 0.106  |
| H10  | HC | 0.042  |  | H20  | H1   | 0.042  |    | O1     | O  | -0.522 | C4   | CA    | -0.130 |
| H11  | HC | 0.042  |  | H21  | H1   | 0.042  |    | C1     | C  | 0.590  | H5   | HA    | 0.115  |
| C17  | CT | -0.087 |  | C25  | CT   | 0.048  |    | N1     | N  | -0.477 | C3   | CA    | -0.045 |
| H12  | HC | 0.015  |  | H22  | H1   | 0.068  |    | H1     | H  | 0.359  | C2   | CT    | -0.023 |
| H13  | HC | 0.015  |  | H23  | H1   | 0.068  |    | C2     | C  | 0.538  | H3   | HC    | 0.029  |
| C18  | CT | -0.066 |  | N6   | N2   | -0.659 |    | O2     | O  | -0.448 | H4   | HC    | 0.029  |
| H14  | HC | 0.016  |  |      |      |        |    | S1     | S  | -0.190 | C1   | CT    | 0.285  |
| H15  | HC | 0.016  |  |      |      |        |    | C3     | CT | -0.015 | C34  | C     | 0.601  |
| C19  | CT | 0.262  |  | 1fkg |      |        |    | H2     | H1 | 0.097  | O4   | O     | -0.715 |
| C20  | CT | -0.212 |  | C21  | CA   | -0.183 |    | C4     | CT | -0.070 | O5   | O     | -0.715 |
| H16  | HC | 0.044  |  | C22  | CA   | -0.134 |    | H3     | HC | 0.081  | H2   | H1    | -0.008 |
| H17  | HC | 0.044  |  | H1   | HA   | 0.133  |    | H4     | HC | 0.081  | N1   | NH    | -0.616 |
| H18  | HC | 0.044  |  | H2   | HA   | 0.145  |    | C5     | CA | -0.027 | H1   | H     | 0.366  |
| C21  | CT | -0.212 |  | C20  | CA   | -0.100 |    | C8     | CA | -0.111 | C9   | CA    | 0.105  |
| H19  | HC | 0.044  |  | H3   | HA   | 0.129  |    | H7     | HA | 0.142  | C14  | CA    | -0.062 |
| H20  | HC | 0.044  |  | C19  | CA   | -0.183 |    | C9     | CA | -0.157 | C13  | CA    | -0.183 |
| H21  | HC | 0.044  |  | H4   | HA   | 0.145  |    | H8     | HA | 0.124  | C12  | CA    | -0.197 |
| C22  | CA | 0.001  |  | C18  | CA   | -0.134 |    | C6     | CA | -0.111 | C11  | CA    | -0.272 |
| C23  | CA | -0.266 |  | H5   | HA   | 0.133  |    | H6     | HA | 0.142  | H9   | HA    | 0.192  |
| H22  | HA | 0.174  |  | C17  | CA   | 0.010  |    | C7     | CA | -0.157 | H10  | HA    | 0.128  |
| C24  | CA | -0.104 |  | C16  | CT   | -0.025 |    | H5     | HA | 0.124  | H11  | HA    | 0.139  |
| H23  | HA | 0.118  |  | H11  | HC   | 0.027  |    | C10    | CA | 0.108  | H12  | HA    | 0.113  |
|      |    |        |  |      |      |        |    | O3     | OS | -0.225 |      |       |        |

## Local Minimum Conformation

|      |    |        |      |    |        |      |    |        |      |    |        |
|------|----|--------|------|----|--------|------|----|--------|------|----|--------|
| C10  | CA | 0.120  | H8   | H1 | 0.052  |      |    |        | H15  | HC | 0.020  |
| C21  | C  | 0.382  | C9   | CA | 0.019  |      |    |        | H16  | HC | 0.020  |
| O2   | O  | -0.550 | C10  | CA | -0.101 | 1h1p |    |        | C16  | CT | 0.007  |
| C15  | CA | 0.014  | H9   | HA | 0.132  | N1   | NA | -0.382 | H17  | HC | 0.016  |
| C16  | CA | -0.122 | C11  | CA | -0.217 | H1   | H  | 0.370  | H18  | HC | 0.016  |
| H13  | HA | 0.147  | H10  | HA | 0.144  | C1   | CR | 0.238  | C17  | CT | -0.020 |
| C17  | CA | -0.177 | C12  | CA | -0.080 | H2   | H5 | 0.184  | H19  | HC | 0.020  |
| H14  | HA | 0.140  | H11  | HA | 0.119  | N2   | NB | -0.536 | H20  | HC | 0.020  |
| C18  | CA | -0.108 | C13  | CA | -0.217 | C2   | CB | 0.208  | C18  | CT | -0.038 |
| H15  | HA | 0.119  | H12  | HA | 0.144  | C3   | CB | 0.397  | H21  | HC | 0.021  |
| C19  | CA | -0.177 | C14  | CA | -0.101 | N3   | NC | -0.523 | H22  | HC | 0.021  |
| H16  | HA | 0.140  | H13  | HA | 0.132  | C4   | CA | 0.543  |      |    |        |
| C20  | CA | -0.122 |      |    |        | N4   | NH | -0.850 |      |    |        |
| H17  | HA | 0.147  |      |    |        | H3   | H  | 0.441  |      |    |        |
|      |    |        |      |    |        | H4   | H  | 0.441  | 1h9u |    |        |
|      |    |        | 1gwx |    |        | N5   | NA | -0.208 | O1   | O  | -0.759 |
|      |    |        | O1   | O  | -0.777 | H18  | H  | 0.284  | C17  | C  | 0.720  |
| 1frb |    |        | C1   | C  | 0.740  | C5   | CM | 0.254  | O2   | O  | -0.759 |
| O2   | O  | -0.787 | O2   | O  | -0.777 | O1   | OS | -0.186 | C14  | CA | -0.029 |
| C18  | C  | 0.807  | C2   | CT | 0.570  | C6   | CT | -0.030 | C15  | CA | -0.093 |
| O3   | O  | -0.787 | C3   | CT | -0.185 | H5   | H1 | 0.096  | C16  | CA | -0.364 |
| C17  | CT | -0.089 | H12  | HC | 0.012  | H6   | H1 | 0.096  | H9   | HA | 0.175  |
| H10  | HC | 0.007  | H13  | HC | 0.012  | C7   | CT | 0.004  | H8   | HA | 0.133  |
| H11  | HC | 0.007  | H14  | HC | 0.012  | H7   | HC | 0.062  | C13  | CA | 0.145  |
| C4   | CA | 0.354  | C4   | CT | -0.185 | C8   | CT | -0.032 | H7   | H4 | 0.076  |
| N2   | NC | -0.598 | H15  | HC | 0.012  | H8   | HC | 0.019  | N1   | NC | -0.506 |
| C3   | CA | 0.027  | H16  | HC | 0.012  | H9   | HC | 0.019  | C12  | CA | 0.402  |
| C8   | CA | -0.130 | H17  | HC | 0.012  | C9   | CT | -0.012 | C11  | CX | 0.028  |
| C7   | CA | -0.131 | O3   | OS | -0.484 | H10  | HC | 0.018  | C18  | CX | -0.238 |
| C6   | CA | -0.177 | C5   | CA | 0.237  | H11  | HC | 0.018  | C19  | CX | -0.238 |
| C5   | CA | -0.132 | C10  | CA | -0.125 | C10  | CT | 0.006  | H12  | HC | 0.093  |
| H1   | HA | 0.141  | C9   | CA | -0.220 | H12  | HC | 0.015  | H13  | HC | 0.093  |
| H2   | HA | 0.136  | H10  | HA | 0.131  | H13  | HC | 0.015  | H10  | HC | 0.093  |
| H3   | HA | 0.140  | H9   | HA | 0.113  | C11  | CT | -0.012 | H11  | HC | 0.093  |
| H4   | HA | 0.151  | C6   | CA | -0.125 | H14  | HC | 0.018  | C3   | CA | 0.000  |
| C2   | CA | 0.016  | H8   | HA | 0.113  | H15  | HC | 0.018  | C4   | CA | 0.048  |
| C1   | C  | 0.336  | C7   | CA | -0.220 | C12  | CT | -0.032 | C5   | CA | -0.305 |
| O1   | O  | -0.566 | H7   | HA | 0.131  | H16  | HC | 0.019  | H2   | HA | 0.194  |
| N1   | N  | 0.295  | C8   | CA | 0.021  | H17  | HC | 0.019  | C24  | CT | -0.091 |
| C9   | CT | -0.169 | C11  | CT | -0.024 |      |    |        | H26  | HC | 0.038  |
| H5   | H1 | 0.130  | H18  | HC | 0.020  |      |    |        | H27  | HC | 0.038  |
| H6   | H1 | 0.130  | H19  | HC | 0.020  | 1h1s |    |        | H28  | HC | 0.038  |
| C10  | CA | 0.371  | C12  | CT | -0.014 | C1   | CM | -0.124 | C2   | CA | -0.229 |
| S1   | S  | -0.124 | H20  | HC | 0.026  | H1   | HA | 0.144  | H1   | HA | 0.175  |
| N3   | NB | -0.555 | H21  | HC | 0.026  | C2   | CA | -0.127 | C1   | CA | -0.062 |
| C12  | CB | 0.297  | C13  | CT | -0.103 | H2   | HA | 0.189  | C6   | CA | -0.058 |
| C16  | CA | -0.136 | H22  | H1 | 0.067  | C3   | CA | -0.020 | C7   | CT | 0.298  |
| H9   | HA | 0.146  | H23  | H1 | 0.067  | S1   | SY | 1.146  | C20  | CT | -0.151 |
| C11  | CB | 0.046  | N1   | N  | -0.130 | N1   | NT | -1.045 | H14  | HC | 0.018  |
| C13  | CA | -0.194 | C15  | C  | 0.458  | H3   | H  | 0.474  | H15  | HC | 0.018  |
| H7   | HA | 0.211  | O4   | O  | -0.499 | H4   | H  | 0.474  | H16  | HC | 0.018  |
| C14  | CA | -0.264 | N2   | N  | -0.248 | O1   | O  | -0.544 | C21  | CT | -0.151 |
| H8   | HA | 0.178  | C16  | CA | 0.128  | O2   | O  | -0.544 | H17  | HC | 0.018  |
| C15  | CA | -0.024 | C17  | CA | -0.136 | C4   | CA | -0.127 | H18  | HC | 0.018  |
| C19  | CT | 0.488  | C18  | CA | -0.215 | H5   | HA | 0.189  | H19  | HC | 0.018  |
| F2   | F  | -0.184 | C19  | CA | -0.059 | C5   | CM | -0.124 | C8   | CT | -0.013 |
| F3   | F  | -0.184 | C20  | CA | -0.014 | H6   | HA | 0.144  | H3   | HC | -0.005 |
| F1   | F  | -0.184 | C1   | CI | -0.101 | C6   | CM | 0.076  | H4   | HC | -0.005 |
|      |    |        | C21  | CA | 0.031  | N2   | NH | -0.234 | C9   | CT | -0.036 |
|      |    |        | C12  | CI | -0.086 | H7   | H  | 0.320  | H5   | HC | -0.020 |
| 1g4o |    |        | H1   | HA | 0.121  | C7   | CA | 0.261  | H6   | HC | -0.020 |
| C1   | CA | -0.153 | H2   | HA | 0.171  | N6   | NA | -0.030 | C10  | CT | 0.331  |
| H1   | HA | 0.117  | H3   | HA | 0.161  | H23  | H  | 0.182  | C23  | CT | -0.138 |
| C2   | CA | -0.090 | H11  | H  | 0.175  | N3   | NC | -0.571 | H23  | HC | 0.015  |
| H2   | HA | 0.128  | C14  | CT | -0.054 | C8   | CB | 0.492  | H24  | HC | 0.015  |
| C3   | CA | -0.028 | H24  | H1 | 0.083  | N5   | NA | -0.459 | H25  | HC | 0.015  |
| S1   | SY | 1.140  | H25  | H1 | 0.083  | C10  | CR | 0.263  | C22  | CT | -0.138 |
| N1   | NT | -0.995 | C22  | CT | 0.028  | N4   | NB | -0.558 | H20  | HC | 0.015  |
| H3   | H  | 0.328  | H26  | HC | 0.031  | H9   | H5 | 0.179  | H21  | HC | 0.015  |
| O1   | O  | -0.662 | H27  | HC | 0.031  | H8   | H  | 0.392  | H22  | HC | 0.015  |
| O2   | O  | -0.662 | C23  | CA | 0.023  | C9   | CB | 0.240  |      |    |        |
| C4   | CA | -0.090 | C24  | CA | -0.057 | C11  | CM | 0.185  |      |    |        |
| H4   | HA | 0.128  | C13  | CI | -0.104 | O3   | OS | -0.172 | 1hdq |    |        |
| C5   | CA | -0.153 | C25  | CA | -0.077 | C12  | CT | -0.024 | O1   | OH | -0.723 |
| H5   | HA | 0.117  | H6   | HA | 0.130  | H10  | H1 | 0.096  | N1   | N  | -0.443 |
| C6   | CA | -0.137 | C26  | CA | -0.212 | H11  | H1 | 0.096  | H1   | H  | 0.299  |
| C7   | C  | 0.670  | H5   | HA | 0.174  | C13  | CT | 0.007  | C1   | C  | 0.549  |
| O3   | O  | -0.558 | C27  | CA | -0.151 | H12  | HC | 0.064  | O2   | O  | -0.762 |
| N2   | N  | -0.521 | H4   | HA | 0.169  | C14  | CT | -0.038 | N2   | N  | -0.212 |
| H6   | H  | 0.299  | C28  | CA | 0.171  | H13  | HC | 0.021  | H2   | H  | 0.244  |
| C8   | CT | 0.044  | F1   | F  | -0.146 | H14  | HC | 0.021  | C2   | CT | 0.052  |
| H7   | H1 | 0.052  |      |    |        | C15  | CT | -0.020 | C3   | C  | 0.764  |





## Local Minimum Conformation

|      |    |        |      |    |        |      |    |        |      |    |        |
|------|----|--------|------|----|--------|------|----|--------|------|----|--------|
| C1   | CI | -0.127 | N2   | N  | -0.511 | S1   | SY | 1.115  | C20  | CA | -0.166 |
| C5   | CA | 0.009  | H19  | H  | 0.348  | O1   | O  | -0.578 | H16  | HA | 0.132  |
| C6   | CA | -0.091 | C17  | C  | 0.727  | O2   | O  | -0.578 | C21  | CA | 0.033  |
| C7   | CM | -0.152 | O3   | O  | -0.525 | N1   | NB | -0.609 | C26  | CT | -0.145 |
| H3   | HA | 0.145  | N3   | N  | -0.424 | C7   | CV | 0.606  | H4   | HC | 0.063  |
| H4   | HA | 0.142  | H20  | H  | 0.230  | O3   | OS | -0.228 | H5   | HC | 0.063  |
| C4   | CA | -0.091 | C18  | CR | 0.153  | C8   | CT | -0.026 | H6   | HC | 0.063  |
| H1   | HA | 0.142  | C19  | C* | -0.413 | H5   | H1 | 0.096  | C22  | CA | -0.174 |
| C3   | CM | -0.152 | H21  | HA | 0.197  | H6   | H1 | 0.096  | H15  | HA | 0.156  |
| H2   | HA | 0.145  | C20  | CV | 0.170  | C9   | CT | 0.202  | C23  | CA | 0.033  |
| C2   | CA | 0.115  | C21  | CT | 0.503  | H7   | H1 | 0.057  | C27  | CT | -0.145 |
| N1   | N  | -0.523 | C22  | CT | -0.274 | C15  | CA | -0.102 | H7   | HC | 0.063  |
| H5   | H  | 0.290  | H22  | HC | 0.053  | S2   | S  | -0.206 | H8   | HC | 0.063  |
| C1   | C  | 0.808  | H23  | HC | 0.053  | O4   | OS | -0.423 | H9   | HC | 0.063  |
| O1   | O  | -0.491 | H24  | HC | 0.053  | C10  | CT | 0.055  | C24  | CA | -0.166 |
| N2   | N  | -0.602 | C23  | CT | -0.274 | H8   | H1 | 0.026  | H17  | HA | 0.132  |
| H6   | H  | 0.355  | H25  | HC | 0.053  | H9   | H1 | 0.026  |      |    |        |
| C8   | CR | 0.184  | H26  | HC | 0.053  | C11  | CT | 0.081  |      |    |        |
| C9   | C* | -0.392 | H27  | HC | 0.053  | H10  | HC | 0.028  | 1m48 |    |        |
| H7   | HA | 0.177  | C24  | CT | -0.274 | H11  | HC | 0.028  | C2   | CT | -0.064 |
| C10  | CV | 0.149  | H28  | HC | 0.053  | C12  | C* | 0.027  | H4   | H1 | 0.069  |
| C15  | CT | 0.531  | H29  | HC | 0.053  | C13  | C* | -0.179 | H5   | H1 | 0.069  |
| C12  | CT | -0.199 | H30  | HC | 0.053  | C14  | C  | 0.790  | N3   | NH | -0.204 |
| H14  | HC | 0.027  | N4   | NB | -0.480 | O5   | O  | -0.771 | C1   | C2 | 0.462  |
| H15  | HC | 0.027  | N5   | N* | 0.206  | O6   | O  | -0.771 | N1   | NH | -0.616 |
| H16  | HC | 0.027  | C25  | CA | 0.049  | C16  | CC | 0.064  | H1   | H  | 0.350  |
| C13  | CT | -0.199 | C26  | CM | -0.131 | N2   | N  | -0.203 | H31  | H  | 0.350  |
| H11  | HC | 0.027  | H31  | HA | 0.141  | H12  | H  | 0.267  | N2   | NH | -0.616 |
| H12  | HC | 0.027  | C27  | CA | -0.193 | C17  | C  | 0.463  | H2   | H  | 0.350  |
| H13  | HC | 0.027  | H32  | HA | 0.154  | O7   | O  | -0.553 | H3   | H  | 0.350  |
| C14  | CT | -0.199 | C28  | CA | 0.085  | C18  | C  | 0.697  | C3   | CT | 0.003  |
| H8   | HC | 0.027  | C29  | CT | -0.157 | O9   | O  | -0.754 | H6   | H1 | 0.077  |
| H9   | HC | 0.027  | H33  | HC | 0.064  | O8   | O  | -0.754 | H7   | H1 | 0.077  |
| H10  | HC | 0.027  | H34  | HC | 0.064  |      |    |        | C4   | CT | 0.003  |
| N3   | NB | -0.543 | H35  | HC | 0.064  |      |    |        | H8   | HC | 0.029  |
| N4   | N* | 0.217  | C30  | CA | -0.193 | 1lqd |    |        | H9   | HC | 0.029  |
| C11  | CT | -0.121 | H36  | HA | 0.154  | N3   | NH | -0.751 | C5   | CT | 0.003  |
| H17  | H1 | 0.077  | C31  | CM | -0.131 | H26  | H  | 0.412  | H10  | HC | 0.019  |
| H18  | H1 | 0.077  | H37  | HA | 0.141  | H27  | H  | 0.412  | H11  | HC | 0.019  |
| H19  | H1 | 0.077  |      |    |        | C25  | CA | 0.676  | C6   | CT | 0.078  |
|      |    |        |      |    |        | N4   | NH | -0.751 | H12  | HC | 0.057  |
|      |    |        |      |    |        | H28  | H  | 0.412  | C7   | CT | -0.111 |
|      |    |        | 1l2s |    |        | H29  | H  | 0.412  | H13  | HC | 0.063  |
|      |    |        | C1   | CI | -0.165 | C18  | CA | -0.178 | H14  | HC | 0.063  |
|      |    |        | C6   | CA | 0.010  | C19  | CA | -0.068 | C8   | C  | 0.458  |
|      |    |        | C5   | CA | -0.149 | H21  | HA | 0.142  | O1   | O  | -0.522 |
|      |    |        | C3   | CA | -0.128 | C17  | CA | -0.067 | N4   | N  | -0.390 |
|      |    |        | H3   | HA | 0.152  | H20  | HA | 0.131  | H15  | H  | 0.271  |
|      |    |        | H5   | HA | 0.148  | C16  | CA | -0.163 | C9   | CT | -0.037 |
|      |    |        | C4   | CA | -0.149 | H19  | HA | 0.173  | C10  | C  | 0.816  |
|      |    |        | H4   | HA | 0.148  | C15  | CA | -0.064 | O2   | O  | -0.573 |
|      |    |        | C2   | CA | -0.128 | H18  | HA | 0.142  | O3   | OS | -0.417 |
|      |    |        | H2   | HA | 0.152  | C14  | CA | 0.037  | C11  | CT | -0.005 |
|      |    |        | C1   | CA | 0.312  | C13  | CT | -0.018 | H17  | H1 | 0.092  |
|      |    |        | N1   | NH | -0.746 | H13  | H1 | 0.074  | H18  | H1 | 0.092  |
|      |    |        | H1   | H  | 0.386  | H14  | H1 | 0.074  | H19  | H1 | 0.092  |
|      |    |        | S1   | SY | 0.996  | N1   | N* | -0.164 | H16  | H1 | 0.110  |
|      |    |        | O1   | O  | -0.545 | C3   | CB | 0.048  | C12  | CT | -0.128 |
|      |    |        | O2   | O  | -0.545 | C2   | CA | -0.204 | H20  | HC | 0.088  |
|      |    |        | C7   | CA | -0.019 | H25  | HA | 0.162  | H21  | HC | 0.088  |
|      |    |        | C8   | CA | -0.008 | C1   | CA | -0.168 | C13  | CA | 0.012  |
|      |    |        | C10  | C  | 0.740  | H24  | HA | 0.166  | C16  | CA | -0.154 |
|      |    |        | O3   | O  | -0.685 | C6   | CA | -0.197 | C17  | CA | -0.088 |
|      |    |        | O4   | O  | -0.685 | H23  | HA | 0.159  | H25  | HA | 0.133  |
|      |    |        | S2   | S  | -0.014 | C5   | CA | 0.047  | H24  | HA | 0.139  |
|      |    |        | C11  | CA | -0.269 | C9   | CT | -0.134 | C14  | CA | -0.154 |
|      |    |        | H7   | H4 | 0.206  | H10  | HC | 0.058  | H22  | HA | 0.139  |
|      |    |        | C9   | CA | -0.174 | H11  | HC | 0.058  | C15  | CA | -0.088 |
|      |    |        | H6   | HA | 0.159  | H12  | HC | 0.058  | H23  | HA | 0.133  |
|      |    |        |      |    |        | C4   | CB | 0.088  | C18  | CA | 0.052  |
|      |    |        | 1l8g |    |        | C8   | C* | -0.221 | C19  | CZ | -0.094 |
|      |    |        | C2   | CA | -0.162 | H22  | HA | 0.189  | C20  | CZ | -0.132 |
|      |    |        | H1   | HA | 0.166  | C7   | C* | -0.037 | C21  | CA | 0.066  |
|      |    |        | C1   | CA | -0.136 | C10  | C  | 0.423  | C22  | CA | -0.084 |
|      |    |        | H2   | HA | 0.137  | O1   | O  | -0.559 | H26  | HA | 0.130  |
|      |    |        | C4   | CA | -0.051 | N2   | N  | -0.184 | C23  | CA | -0.188 |
|      |    |        | H3   | HA | 0.131  | H1   | H  | 0.220  | H27  | HA | 0.159  |
|      |    |        | C5   | CA | -0.091 | C11  | CT | -0.060 | C26  | CA | -0.090 |
|      |    |        | H4   | HA | 0.174  | H2   | H1 | 0.094  | H30  | HA | 0.149  |
|      |    |        | C6   | CB | -0.054 | H3   | H1 | 0.094  | C25  | CA | -0.188 |
|      |    |        | C3   | CB | -0.103 | C12  | CA | -0.039 | H29  | HA | 0.159  |
|      |    |        |      |    |        |      |    |        |      |    |        |
| 1kv2 |    |        |      |    |        |      |    |        |      |    |        |
| C2   | CT | -0.094 |      |    |        |      |    |        |      |    |        |
| H1   | HP | 0.127  |      |    |        |      |    |        |      |    |        |
| H2   | HP | 0.127  |      |    |        |      |    |        |      |    |        |
| C1   | CT | 0.136  |      |    |        |      |    |        |      |    |        |
| H3   | H1 | 0.071  |      |    |        |      |    |        |      |    |        |
| H4   | H1 | 0.071  |      |    |        |      |    |        |      |    |        |
| O1   | OS | -0.368 |      |    |        |      |    |        |      |    |        |
| C3   | CT | 0.136  |      |    |        |      |    |        |      |    |        |
| H5   | H1 | 0.071  |      |    |        |      |    |        |      |    |        |
| H6   | H1 | 0.071  |      |    |        |      |    |        |      |    |        |
| C4   | CT | -0.094 |      |    |        |      |    |        |      |    |        |
| H7   | HP | 0.127  |      |    |        |      |    |        |      |    |        |
| H8   | HP | 0.127  |      |    |        |      |    |        |      |    |        |
| N1   | N3 | -0.017 |      |    |        |      |    |        |      |    |        |
| H38  | H  | 0.291  |      |    |        |      |    |        |      |    |        |
| C5   | CT | -0.256 |      |    |        |      |    |        |      |    |        |
| H9   | HP | 0.177  |      |    |        |      |    |        |      |    |        |
| H10  | HP | 0.177  |      |    |        |      |    |        |      |    |        |
| C6   | CT | -0.034 |      |    |        |      |    |        |      |    |        |
| H11  | H1 | 0.140  |      |    |        |      |    |        |      |    |        |
| H12  | H1 | 0.140  |      |    |        |      |    |        |      |    |        |
| O2   | OS | -0.312 |      |    |        |      |    |        |      |    |        |
| C7   | CA | 0.020  |      |    |        |      |    |        |      |    |        |
| C10  | CA | 0.085  |      |    |        |      |    |        |      |    |        |
| C11  | CA | -0.220 |      |    |        |      |    |        |      |    |        |
| C12  | CA | -0.116 |      |    |        |      |    |        |      |    |        |
| C13  | CA | -0.150 |      |    |        |      |    |        |      |    |        |
| C14  | CA | -0.133 |      |    |        |      |    |        |      |    |        |
| H15  | HA | 0.103  |      |    |        |      |    |        |      |    |        |
| C15  | CA | 0.097  |      |    |        |      |    |        |      |    |        |
| H16  | HA | 0.163  |      |    |        |      |    |        |      |    |        |
| H17  | HA | 0.152  |      |    |        |      |    |        |      |    |        |
| H18  | HA | 0.149  |      |    |        |      |    |        |      |    |        |
| C8   | CA | -0.131 |      |    |        |      |    |        |      |    |        |
| H14  | HA | 0.153  |      |    |        |      |    |        |      |    |        |
| C9   | CM | -0.212 |      |    |        |      |    |        |      |    |        |
| H13  | HA | 0.195  |      |    |        |      |    |        |      |    |        |
| C16  | CA | 0.085  |      |    |        |      |    |        |      |    |        |

## Local Minimum Conformation

|      |    |        |      |    |        |      |    |        |  |      |    |        |
|------|----|--------|------|----|--------|------|----|--------|--|------|----|--------|
| C24  | CA | -0.084 | C6   | CT | -0.211 | H12  | HP | 0.167  |  |      |    |        |
| H28  | HA | 0.130  | H7   | HC | 0.043  | N3   | N3 | -0.086 |  |      |    |        |
|      |    |        | H8   | HC | 0.043  | H24  | H  | 0.294  |  | 1nhu |    |        |
|      |    |        | H9   | HC | 0.043  | C20  | CT | 0.018  |  | F1   | F  | -0.212 |
| 1mmb |    |        | C7   | CT | -0.211 | H13  | HP | 0.106  |  | C24  | CT | 0.578  |
| S1   | S  | -0.029 | H10  | HC | 0.043  | H14  | HP | 0.106  |  | F2   | F  | -0.212 |
| C1   | CA | -0.222 | H11  | HC | 0.043  | C21  | CT | -0.142 |  | F3   | F  | -0.212 |
| H1   | H4 | 0.200  | H12  | HC | 0.043  | H15  | HP | 0.171  |  | C22  | CA | -0.055 |
| C2   | C* | -0.254 | H6   | HC | 0.063  | H16  | HP | 0.171  |  | C23  | CA | -0.158 |
| H2   | HA | 0.161  | H4   | HC | 0.016  | N4   | N3 | -0.044 |  | H16  | HA | 0.152  |
| C3   | C* | -0.010 | H5   | HC | 0.016  | C22  | CT | -0.406 |  | C21  | CA | -0.132 |
| H3   | HA | 0.143  | H3   | HC | -0.025 | H17  | HP | 0.212  |  | H13  | HA | 0.132  |
| C4   | CA | -0.001 | C8   | C  | 0.473  | H18  | HP | 0.212  |  | C20  | CA | -0.195 |
| S2   | S  | -0.165 | O3   | O  | -0.589 | H19  | HP | 0.212  |  | H14  | HA | 0.149  |
| C5   | CT | -0.170 | N2   | N  | -0.402 | H25  | H  | 0.351  |  | C19  | CA | -0.079 |
| H4   | H1 | 0.154  | H25  | H  | 0.265  | C23  | CT | -0.142 |  | H15  | HA | 0.153  |
| H5   | H1 | 0.154  | C9   | CT | 0.148  | H20  | HP | 0.171  |  | C18  | CA | 0.013  |
| C6   | CT | -0.265 | C10  | C  | 0.501  | H21  | HP | 0.171  |  | C17  | CT | -0.164 |
| C7   | C  | 0.868  | N3   | N  | -0.391 | C24  | CT | 0.018  |  | H4   | H1 | 0.135  |
| N1   | N  | -0.346 | C11  | CT | -0.197 | H22  | HP | 0.106  |  | H5   | H1 | 0.135  |
| O1   | OH | -0.690 | H14  | H1 | 0.096  | H23  | HP | 0.106  |  | N1   | N  | -0.078 |
| H6   | H  | 0.266  | H15  | H1 | 0.096  |      |    |        |  | C3   | C  | 0.384  |
| O2   | O  | -0.750 | H16  | H1 | 0.096  |      |    |        |  | O3   | O  | -0.554 |
| H7   | HC | 0.066  | H26  | H  | 0.266  | 1mq6 |    |        |  | C4   | CA | 0.106  |
| C8   | CT | -0.023 | O4   | O  | -0.566 | C3   | CA | -0.331 |  | C5   | CA | -0.090 |
| C9   | CT | -0.080 | H13  | H1 | 0.008  | H1   | HA | 0.162  |  | C6   | CA | -0.154 |
| C10  | CT | 0.174  | C12  | CT | -0.091 | C2   | CA | 0.001  |  | C7   | CA | 0.004  |
| C11  | CT | -0.363 | H17  | HC | 0.059  | H2   | HA | 0.163  |  | C8   | CA | -0.031 |
| H8   | HC | 0.087  | H18  | HC | 0.059  | C1   | CM | -0.122 |  | C9   | CA | -0.070 |
| H9   | HC | 0.087  | C13  | CA | 0.090  | C11  | CI | -0.091 |  | C12  | CI | -0.091 |
| H10  | HC | 0.087  | C14  | CA | -0.161 | C4   | CA | 0.256  |  | H6   | HA | 0.116  |
| C12  | CT | -0.363 | H19  | HA | 0.110  | H3   | H4 | 0.101  |  | C11  | CI | -0.141 |
| H11  | HC | 0.087  | C15  | CA | -0.161 | N1   | NC | -0.508 |  | H7   | HA | 0.153  |
| H12  | HC | 0.087  | H20  | HA | 0.109  | C5   | CA | 0.589  |  | H8   | HA | 0.176  |
| H13  | HC | 0.087  | C16  | CA | -0.106 | N2   | N  | -0.589 |  | C1   | CT | 0.059  |
| H14  | HC | 0.050  | H21  | HA | 0.108  | H4   | H  | 0.318  |  | C2   | C  | 0.714  |
| H15  | HC | 0.071  | C17  | CA | -0.161 | C6   | C  | 0.610  |  | O1   | O  | -0.753 |
| H16  | HC | 0.071  | H22  | HA | 0.109  | O1   | O  | -0.526 |  | O2   | O  | -0.753 |
| H17  | HC | 0.060  | C18  | CA | -0.161 | C7   | CA | -0.018 |  | H3   | H1 | 0.037  |
| C13  | C  | 0.103  | H23  | HA | 0.110  | C8   | CA | -0.113 |  | C10  | CT | -0.012 |
| O3   | O  | -0.446 |      |    |        | H9   | HA | 0.147  |  | H1   | HC | 0.035  |
| N2   | N  | -0.252 |      |    |        | C9   | CA | -0.110 |  | H2   | HC | 0.035  |
| H18  | H  | 0.292  | 1mq5 |    |        | C12  | CI | -0.056 |  | C11  | CA | -0.021 |
| C14  | CT | 0.077  | C3   | CA | -0.175 | C10  | CA | -0.014 |  | C12  | CA | -0.122 |
| C15  | C  | 0.499  | H1   | HA | 0.157  | H8   | HA | 0.117  |  | H12  | HA | 0.125  |
| N3   | N  | -0.413 | C2   | CA | -0.065 | C11  | CA | 0.148  |  | C13  | CA | -0.178 |
| C16  | CT | -0.115 | H2   | HA | 0.145  | O2   | OS | -0.254 |  | H11  | HA | 0.130  |
| H19  | H1 | 0.078  | C1   | CA | -0.024 | C12  | CT | -0.024 |  | C14  | CA | -0.127 |
| H20  | H1 | 0.078  | C11  | CI | -0.086 | H5   | H1 | 0.084  |  | H10  | HA | 0.116  |
| H21  | H1 | 0.078  | C4   | CA | -0.065 | H6   | H1 | 0.084  |  | C15  | CA | -0.178 |
| H22  | H  | 0.298  | H3   | HA | 0.145  | H7   | H1 | 0.084  |  | H9   | HA | 0.130  |
| O4   | O  | -0.558 | C5   | CA | -0.175 | C13  | CA | 0.027  |  | C16  | CA | -0.122 |
| H23  | H1 | 0.057  | H4   | HA | 0.157  | N3   | N  | -0.402 |  | H17  | HA | 0.125  |
| C17  | CT | -0.035 | C6   | CA | 0.122  | H10  | H  | 0.305  |  |      |    |        |
| H24  | HC | 0.038  | N1   | N  | -0.398 | C14  | C  | 0.613  |  |      |    |        |
| H25  | HC | 0.038  | H5   | H  | 0.297  | O3   | O  | -0.507 |  | 1nhv |    |        |
| C18  | CA | 0.016  | C7   | C  | 0.564  | C15  | C* | -0.050 |  | C15  | CA | -0.157 |
| C19  | CA | -0.168 | O1   | O  | -0.522 | S1   | S  | 0.027  |  | C16  | CA | -0.125 |
| H26  | HA | 0.141  | C8   | CA | -0.059 | C17  | CA | -0.148 |  | H11  | HA | 0.118  |
| C20  | CA | -0.131 | C9   | CA | -0.077 | H11  | H4 | 0.237  |  | H10  | HA | 0.128  |
| H27  | HA | 0.132  | H8   | HA | 0.140  | C16  | C* | -0.019 |  | C14  | CA | -0.159 |
| C21  | CA | -0.141 | C10  | CA | -0.055 | C13  | CI | -0.025 |  | H9   | HA | 0.123  |
| H28  | HA | 0.131  | C12  | CI | -0.056 | C18  | C* | -0.050 |  | C13  | CA | -0.157 |
| C22  | CA | -0.131 | C11  | CA | -0.015 | C19  | CT | -0.018 |  | H8   | HA | 0.128  |
| H29  | HA | 0.132  | H7   | HA | 0.149  | H12  | HP | 0.111  |  | C12  | CA | -0.125 |
| C23  | CA | -0.168 | C12  | CA | -0.147 | H13  | HP | 0.111  |  | H7   | HA | 0.118  |
| H30  | HA | 0.141  | H6   | HA | 0.155  | N4   | N3 | -0.146 |  | C11  | CA | -0.015 |
|      |    |        | C13  | CA | -0.005 | C20  | CT | -0.071 |  | C10  | CT | -0.024 |
|      |    |        | N2   | N  | -0.214 | H14  | HP | 0.106  |  | H5   | HC | 0.050  |
|      |    |        | H9   | H  | 0.221  | H15  | HP | 0.106  |  | H6   | HC | 0.050  |
| 1mnc |    |        | C14  | C  | 0.598  | H16  | HP | 0.106  |  | C1   | CT | 0.058  |
| O1   | OH | -0.604 | O2   | O  | -0.497 | H21  | H  | 0.310  |  | C2   | C  | 0.694  |
| N1   | N  | -0.242 | C15  | C* | -0.154 | C21  | C2 | 0.736  |  | O1   | O  | -0.748 |
| H24  | H  | 0.260  | S1   | S  | 0.180  | N5   | N2 | -0.553 |  | O2   | O  | -0.748 |
| C1   | C  | 0.488  | C17  | CA | -0.243 | C22  | CT | 0.041  |  | H1   | H1 | 0.060  |
| O2   | O  | -0.648 | H10  | H4 | 0.233  | H17  | H1 | 0.114  |  | N1   | N  | -0.172 |
| C2   | CT | 0.011  | C16  | C* | -0.029 | H18  | H1 | 0.114  |  | C3   | C  | 0.443  |
| H1   | HC | -0.038 | C13  | CI | -0.041 | C23  | CT | -0.007 |  | O3   | O  | -0.563 |
| H2   | HC | -0.038 | C18  | C* | 0.053  | H19  | H1 | 0.127  |  | C4   | CA | 0.102  |
| C3   | CT | 0.189  | C19  | CT | -0.154 | H20  | H1 | 0.127  |  | C5   | CA | -0.122 |
| C4   | CT | -0.086 | H11  | HP | 0.167  | O4   | OS | -0.430 |  | C6   | CA | -0.123 |
| C5   | CT | 0.085  |      |    |        |      |    |        |  |      |    |        |

## Local Minimum Conformation

|      |    |        |      |    |        |      |    |        |      |    |        |
|------|----|--------|------|----|--------|------|----|--------|------|----|--------|
| C7   | CA | 0.008  | C15  | CT | -0.028 | C26  | CT | -0.067 | C8   | CA | -0.221 |
| C8   | CA | -0.033 | H22  | HC | 0.049  | H34  | HC | 0.084  | H7   | HA | 0.165  |
| C9   | CA | -0.078 | H23  | HC | 0.049  | H35  | HC | 0.084  | C7   | CA | -0.121 |
| C12  | CI | -0.087 | C16  | CA | 0.013  | C20  | CT | 0.014  | H6   | HA | 0.151  |
| H4   | HA | 0.119  | C17  | CA | -0.150 | H33  | HP | 0.079  | C6   | CA | -0.103 |
| CI1  | CI | -0.147 | H24  | HA | 0.141  | C21  | C  | 0.095  | H5   | HA | 0.149  |
| H3   | HA | 0.144  | C18  | CA | -0.175 | O4   | O  | -0.361 | C5   | CA | -0.209 |
| H2   | HA | 0.184  | H25  | HA | 0.141  | N3   | N  | -0.233 | H4   | HA | 0.153  |
| C17  | CT | -0.167 | C19  | CA | -0.103 | H32  | H  | 0.268  | C10  | CA | 0.120  |
| H12  | H1 | 0.175  | H26  | HA | 0.126  | C22  | CT | 0.192  | C4   | CA | -0.197 |
| H13  | H1 | 0.175  | C20  | CA | -0.175 | C24  | CT | -0.165 | H3   | HA | 0.166  |
| C18  | CA | 0.025  | H27  | HA | 0.141  | H26  | HC | 0.058  | C3   | CA | -0.165 |
| S1   | S  | -0.130 | C21  | CA | -0.150 | H27  | HC | 0.058  | H2   | HA | 0.165  |
| C19  | C* | -0.203 | H28  | HA | 0.141  | H28  | HC | 0.058  |      |    |        |
| H14  | HA | 0.185  |      |    |        | C25  | CT | -0.165 |      |    |        |
| C20  | C* | -0.056 |      |    |        | H29  | HC | 0.058  | 1pph |    |        |
| H15  | HA | 0.124  | 1ohr |    |        | H30  | HC | 0.058  | C5   | CA | -0.162 |
| C21  | C* | -0.032 | C3   | CT | -0.151 | H31  | HC | 0.058  | C6   | CA | -0.155 |
| C22  | C* | 0.220  | H2   | HC | 0.068  | C23  | CT | -0.165 | H4   | HA | 0.168  |
| C23  | C* | -0.366 | H3   | HC | 0.068  | H23  | HC | 0.058  | H3   | HA | 0.156  |
| H16  | HA | 0.217  | H4   | HC | 0.068  | H24  | HC | 0.058  | C4   | CA | 0.111  |
| C24  | CB | 0.091  | C2   | CA | 0.039  | H25  | HC | 0.058  | C7   | CT | -0.191 |
| C25  | CA | -0.203 | C1   | CA | 0.286  |      |    |        | H5   | HC | 0.080  |
| H17  | HA | 0.156  | O1   | OH | -0.588 |      |    |        | H6   | HC | 0.080  |
| C26  | CA | -0.210 | H1   | HO | 0.446  | 1ppc |    |        | H7   | HC | 0.080  |
| H18  | HA | 0.146  | C4   | CA | -0.237 | N3   | NH | -0.791 | C3   | CA | -0.162 |
| C27  | CA | -0.139 | H5   | HA | 0.167  | H15  | H  | 0.430  | H2   | HA | 0.156  |
| H19  | HA | 0.140  | C5   | CA | -0.207 | H22  | H  | 0.430  | C2   | CA | -0.155 |
| C28  | CA | -0.267 | H6   | HA | 0.189  | C22  | CA | 0.670  | H1   | HA | 0.168  |
| H20  | HA | 0.170  | C6   | CA | -0.122 | N4   | NH | -0.791 | C1   | CA | 0.013  |
| C29  | CB | 0.287  | H7   | HA | 0.133  | H16  | H  | 0.430  | S1   | SY | 0.815  |
| O4   | OS | -0.283 | C7   | CA | -0.069 | H17  | H  | 0.430  | O1   | O  | -0.506 |
|      |    |        | C8   | C  | 0.327  | C21  | CA | -0.079 | O2   | O  | -0.506 |
|      |    |        | O2   | O  | -0.437 | C20  | CA | -0.179 | N1   | NT | -0.471 |
| 1o86 |    |        | N1   | N  | -0.274 | C18  | CA | -0.105 | H15  | H  | 0.330  |
| O1   | O  | -0.683 | H8   | H  | 0.239  | H19  | HA | 0.168  | C9   | CT | 0.070  |
| C1   | C  | 0.680  | C9   | CT | 0.143  | H21  | HA | 0.154  | C10  | CT | 0.033  |
| O2   | O  | -0.683 | C10  | CT | -0.225 | C19  | CA | -0.179 | C11  | CA | -0.004 |
| C2   | CT | 0.024  | S1   | S  | -0.246 | H20  | HA | 0.154  | C12  | CA | -0.091 |
| H7   | H1 | 0.056  | C11  | CA | 0.145  | C17  | CA | -0.105 | C14  | CA | -0.170 |
| C3   | CT | -0.032 | C12  | CA | -0.089 | H18  | HA | 0.168  | C16  | CA | -0.077 |
| H5   | HC | 0.038  | C13  | CA | -0.212 | C16  | CA | 0.090  | C15  | CA | -0.162 |
| H6   | HC | 0.038  | C14  | CA | -0.082 | C15  | CT | -0.092 | C13  | CA | -0.049 |
| C4   | CT | -0.051 | C15  | CA | -0.212 | H13  | HC | 0.062  | H12  | HA | 0.141  |
| H3   | HC | 0.053  | C16  | CA | -0.089 | H14  | HC | 0.062  | H13  | HA | 0.170  |
| H4   | HC | 0.053  | H9   | HA | 0.126  | C13  | CT | 0.121  | H14  | HA | 0.128  |
| C5   | CT | -0.150 | H10  | HA | 0.167  | C14  | C  | 0.413  | C17  | CA | 0.693  |
| H1   | H1 | 0.093  | H11  | HA | 0.151  | O4   | O  | -0.531 | N2   | NH | -0.760 |
| H2   | H1 | 0.093  | H12  | HA | 0.167  | N5   | N  | -0.153 | H16  | H  | 0.412  |
| N1   | N  | -0.009 | H13  | HA | 0.126  | C23  | CT | 0.018  | H17  | H  | 0.412  |
| C6   | C  | 0.205  | H14  | H1 | 0.114  | C24  | CT | 0.007  | N3   | NH | -0.760 |
| O3   | O  | -0.493 | H15  | H1 | 0.114  | C25  | CT | -0.067 | H18  | H  | 0.412  |
| C7   | CT | 0.003  | H16  | H1 | 0.131  | C26  | CT | 0.007  | H19  | H  | 0.412  |
| C8   | CT | -0.001 | C17  | CT | 0.102  | C27  | CT | 0.018  | H11  | HA | 0.157  |
| C9   | CT | -0.051 | O3   | OH | -0.654 | H31  | H1 | 0.034  | H9   | HC | 0.022  |
| C10  | CT | -0.082 | H17  | HO | 0.433  | H32  | H1 | 0.034  | H10  | HC | 0.022  |
| C11  | CT | 0.080  | H18  | H1 | 0.166  | H29  | HC | 0.026  | H8   | H1 | 0.129  |
| N2   | N3 | -0.337 | C18  | CT | -0.004 | H30  | HC | 0.026  | C8   | C  | 0.358  |
| H8   | H  | 0.284  | H19  | HP | 0.075  | H27  | HC | 0.022  | O3   | O  | -0.512 |
| H9   | H  | 0.284  | H20  | HP | 0.075  | H28  | HC | 0.022  | N4   | N  | -0.124 |
| H31  | H  | 0.284  | N2   | N3 | -0.001 | H25  | HC | 0.026  | C18  | CT | -0.022 |
| H10  | HP | 0.063  | H46  | H  | 0.168  | H26  | HC | 0.026  | H20  | H1 | 0.055  |
| H11  | HP | 0.063  | C19  | CT | -0.006 | H23  | H1 | 0.034  | H21  | H1 | 0.055  |
| H12  | HC | 0.048  | H21  | HP | 0.065  | H24  | H1 | 0.034  | C19  | CT | 0.003  |
| H13  | HC | 0.048  | H22  | HP | 0.065  | H12  | H1 | 0.036  | H22  | HC | 0.023  |
| H14  | HC | 0.027  | C28  | CT | 0.029  | N2   | N  | -0.322 | H23  | HC | 0.023  |
| H15  | HC | 0.027  | H37  | HC | 0.049  | H11  | H  | 0.278  | C20  | CT | -0.041 |
| H16  | HC | 0.054  | C29  | CT | -0.032 | C12  | C  | 0.559  | H24  | HC | 0.027  |
| H17  | HC | 0.054  | H38  | HC | 0.020  | O3   | O  | -0.591 | H25  | HC | 0.027  |
| H18  | HP | 0.076  | H39  | HC | 0.020  | C11  | CT | -0.066 | C21  | CT | 0.003  |
| N3   | N3 | -0.006 | C30  | CT | 0.016  | H9   | H1 | 0.121  | H26  | HC | 0.023  |
| H29  | H  | 0.209  | H40  | HC | 0.014  | H10  | H1 | 0.121  | H27  | HC | 0.023  |
| H30  | H  | 0.209  | H41  | HC | 0.014  | N1   | NT | -0.655 | C22  | CT | -0.022 |
| C12  | CT | 0.006  | C31  | CT | -0.009 | H8   | H  | 0.395  | H28  | H1 | 0.055  |
| C13  | C  | 0.717  | H42  | HC | 0.019  | S1   | SY | 0.928  | H29  | H1 | 0.055  |
| O4   | O  | -0.710 | H43  | HC | 0.019  | O1   | O  | -0.505 |      |    |        |
| O5   | O  | -0.710 | C32  | CT | -0.042 | O2   | O  | -0.505 | 1qbu |    |        |
| H19  | HP | 0.054  | H44  | HC | 0.023  | C2   | CA | -0.025 | C16  | CV | -0.013 |
| C14  | CT | 0.063  | H45  | HC | 0.023  | C1   | CA | -0.131 | N4   | NB | -0.383 |
| H20  | HC | -0.005 | C27  | CT | -0.015 | H1   | HA | 0.154  | H15  | H4 | 0.146  |
| H21  | HC | -0.005 | H36  | HC | 0.013  | C9   | CA | 0.106  |      |    |        |

Local Minimum Conformation

|      |    |        |      |    |        |      |    |        |      |    |        |
|------|----|--------|------|----|--------|------|----|--------|------|----|--------|
| C17  | CA | -0.317 | C1   | CT | 0.235  | N4   | NT | -0.374 | H10  | H1 | 0.142  |
| H16  | H4 | 0.227  | H8   | H1 | 0.005  | S1   | SY | 0.844  | H11  | H1 | 0.142  |
| S1   | S  | 0.038  | H9   | H1 | 0.005  | O2   | O  | -0.491 | C9   | CT | 0.035  |
| C15  | CR | 0.355  | C2   | CT | -0.012 | O3   | O  | -0.491 | H12  | H1 | 0.073  |
| N3   | N  | -0.307 | H6   | HC | 0.044  | C16  | CA | -0.004 | H13  | H1 | 0.073  |
| H17  | H  | 0.175  | H7   | HC | 0.044  | C18  | CA | -0.217 | C6   | CT | -0.206 |
| C14  | C  | 0.582  | C3   | CT | -0.056 | C19  | CA | -0.177 | H8   | H1 | 0.142  |
| O4   | O  | -0.536 | H4   | HC | 0.036  | H7   | HA | 0.167  | H9   | H1 | 0.142  |
| C10  | CA | -0.078 | H5   | HC | 0.036  | H6   | HA | 0.189  | C7   | CT | 0.035  |
| C11  | CA | -0.080 | C4   | CT | -0.094 | C17  | CA | -0.039 | H6   | H1 | 0.073  |
| C12  | CA | -0.197 | H2   | H1 | 0.077  | H11  | HA | 0.138  | H7   | H1 | 0.073  |
| C13  | CA | -0.131 | H3   | H1 | 0.077  | C20  | CA | 0.055  | N4   | NH | -0.286 |
| H11  | HA | 0.143  | N1   | N* | -0.021 | C21  | CA | 0.075  | C10  | CA | 0.020  |
| H12  | HA | 0.158  | C9   | CK | 0.112  | C22  | CA | -0.079 | C11  | CA | -0.075 |
| H13  | HA | 0.149  | N5   | NB | -0.559 | H8   | HA | 0.129  | H14  | HA | 0.102  |
| C9   | CA | -0.142 | C8   | CB | 0.199  | C25  | CA | -0.022 | C12  | CA | 0.037  |
| H14  | HA | 0.141  | C7   | C  | 0.525  | CI1  | CI | -0.087 | C13  | CT | -0.135 |
| C8   | CA | 0.006  | N4   | N  | -0.505 | C23  | CA | -0.053 | H15  | HC | 0.060  |
| C2   | CT | -0.041 | H12  | H  | 0.339  | H9   | HA | 0.144  | H16  | HC | 0.060  |
| H18  | H1 | 0.083  | O2   | O  | -0.547 | C24  | CA | -0.225 | H17  | HC | 0.060  |
| H19  | H1 | 0.083  | H11  | H5 | 0.161  | H10  | HA | 0.168  | C14  | CA | -0.098 |
| N1   | N  | 0.002  | C5   | CB | 0.101  |      |    |        | H18  | HA | 0.141  |
| C1   | C  | 0.273  | N2   | NC | -0.399 |      |    |        | C15  | CA | -0.227 |
| O1   | O  | -0.528 | C6   | CA | 0.497  |      |    |        | H19  | HA | 0.172  |
| N2   | N  | 0.005  | N3   | NH | -0.471 | 1qpe |    |        | C16  | CA | -0.141 |
| C7   | CT | -0.248 | H1   | H  | 0.325  | C13  | CT | -0.362 | H20  | HA | 0.159  |
| C32  | CX | 0.018  | C13  | CM | 0.122  | H9   | HC | 0.137  |      |    |        |
| C33  | CX | -0.347 | H12  | CM | -0.117 | H10  | HC | 0.137  |      |    |        |
| C34  | CX | -0.347 | H13  | HA | 0.137  | H11  | HC | 0.137  |      |    |        |
| H29  | HC | 0.156  | C11  | CA | -0.201 | C12  | CT | 0.111  | 1syn |    |        |
| H30  | HC | 0.156  | H17  | HA | 0.152  | C14  | CT | -0.362 | C1   | CA | -0.130 |
| H31  | HC | 0.156  | C10  | CA | -0.067 | H12  | HC | 0.137  | H1   | HA | 0.155  |
| H32  | HC | 0.156  | H16  | HA | 0.122  | H13  | HC | 0.137  | C2   | CA | -0.169 |
| H28  | HC | 0.072  | C15  | CA | -0.201 | H14  | HC | 0.137  | H2   | HA | 0.134  |
| H26  | H1 | 0.148  | H15  | HA | 0.152  | C15  | CT | -0.362 | C3   | CA | 0.017  |
| H27  | H1 | 0.148  | C14  | CM | -0.117 | H15  | HC | 0.137  | C4   | CA | -0.147 |
| C6   | CT | 0.006  | H14  | HA | 0.137  | H16  | HC | 0.137  | H3   | HA | 0.152  |
| C25  | CT | -0.088 |      |    |        | H17  | HC | 0.137  | C5   | CA | -0.189 |
| C26  | CA | 0.012  |      |    |        | N4   | N* | -0.003 | H4   | HA | 0.136  |
| C27  | CA | -0.127 | 1ql9 |    |        | N3   | NA | -0.113 | C6   | CA | 0.242  |
| C28  | CA | -0.184 | C2   | CA | -0.204 | H1   | H  | 0.333  | N1   | NC | -0.615 |
| C29  | CA | -0.096 | H3   | HA | 0.173  | C1   | CA | 0.340  | C7   | CD | 0.507  |
| C30  | CA | -0.184 | C1   | CA | -0.073 | N1   | NC | -0.541 | C8   | CT | -0.162 |
| C31  | CA | -0.127 | H2   | H4 | 0.212  | C2   | CA | 0.526  | H5   | HC | 0.060  |
| H5   | HA | 0.124  | N1   | NA | -0.100 | H4   | H5 | 0.097  | H6   | HC | 0.060  |
| H4   | HA | 0.147  | H1   | H  | 0.320  | N2   | NC | -0.641 | H7   | HC | 0.060  |
| H3   | HA | 0.127  | C4   | CA | -0.073 | C3   | CA | 0.627  | N2   | N  | -0.414 |
| H2   | HA | 0.147  | H5   | H4 | 0.212  | N5   | NH | -0.832 | H8   | H  | 0.296  |
| H1   | HA | 0.124  | C3   | CA | -0.204 | H2   | H  | 0.414  | C9   | C  | 0.489  |
| H33  | HC | 0.055  | H4   | HA | 0.173  | H3   | H  | 0.414  | O1   | O  | -0.538 |
| H34  | HC | 0.055  | C5   | CA | 0.321  | C4   | CA | -0.072 | C10  | CA | 0.011  |
| H25  | H1 | 0.053  | N2   | NH | -0.195 | C5   | CA | -0.018 | C11  | CA | -0.056 |
| C5   | CT | 0.170  | C9   | CT | 0.004  | C6   | CA | 0.054  | C12  | CA | -0.130 |
| O3   | OH | -0.650 | C8   | CT | -0.064 | C7   | CA | -0.141 | H9   | HA | 0.134  |
| H35  | HO | 0.421  | H21  | HC | 0.066  | H5   | HA | 0.150  | C13  | CA | 0.013  |
| H22  | H1 | 0.043  | H22  | HC | 0.066  | C8   | CA | -0.063 | C14  | CT | 0.069  |
| C4   | CT | 0.087  | H23  | H1 | 0.065  | H6   | HA | 0.157  | H10  | H1 | 0.078  |
| O2   | OH | -0.660 | H24  | H1 | 0.065  | C9   | CA | -0.012 | H11  | H1 | 0.078  |
| H36  | HO | 0.444  | C6   | CT | 0.004  | CI1  | CI | -0.032 | N3   | NH | -0.690 |
| H21  | H1 | 0.078  | H25  | H1 | 0.065  | C10  | CA | -0.063 | H12  | H  | 0.375  |
| C3   | CT | -0.007 | H26  | H1 | 0.065  | H7   | HA | 0.157  | C15  | CA | 0.106  |
| H20  | H1 | 0.112  | C7   | CT | -0.064 | C11  | CA | -0.141 | C18  | CA | -0.156 |
| C18  | CT | -0.029 | H27  | HC | 0.066  | H8   | HA | 0.150  | H15  | HA | 0.166  |
| H23  | HC | 0.052  | H28  | HC | 0.066  |      |    |        | C16  | CA | -0.147 |
| H24  | HC | 0.052  | C10  | CT | 0.068  |      |    |        | H14  | HA | 0.097  |
| C19  | CA | -0.021 | H20  | HC | 0.023  | 1r09 |    |        | C17  | CA | -0.189 |
| C20  | CA | -0.121 | C11  | C  | 0.335  | C1   | CT | 0.020  | H13  | HA | 0.139  |
| H10  | HA | 0.126  | O1   | O  | -0.536 | H1   | H1 | 0.092  | C21  | CA | 0.016  |
| C21  | CA | -0.126 | N3   | N  | -0.117 | H2   | H1 | 0.092  | C22  | C  | 0.489  |
| H9   | HA | 0.126  | C15  | CT | -0.029 | H3   | H1 | 0.092  | O2   | O  | -0.615 |
| C22  | CA | -0.173 | C14  | CT | -0.022 | O1   | OS | -0.424 | C19  | CA | -0.032 |
| H8   | HA | 0.145  | H18  | H1 | 0.090  | C2   | CA | 0.812  | C20  | CT | -0.079 |
| C23  | CA | -0.126 | H19  | H1 | 0.090  | N1   | NC | -0.528 | H21  | H1 | 0.088  |
| H7   | HA | 0.126  | H16  | H1 | 0.090  | N2   | NA | 0.011  | H22  | H1 | 0.088  |
| C24  | CA | -0.121 | H17  | H1 | 0.090  | H21  | H  | 0.301  | N4   | N  | -0.063 |
| H6   | HA | 0.126  | C12  | CT | -0.029 | C3   | CA | -0.252 | C23  | CT | 0.057  |
|      |    |        | H14  | H1 | 0.090  | H5   | HA | 0.207  | H16  | H1 | 0.058  |
|      |    |        | H15  | H1 | 0.090  | C4   | CA | -0.099 | C24  | C  | 0.766  |
|      |    |        | C13  | CT | -0.022 | H4   | HA | 0.191  | O3   | O  | -0.810 |
| 1qhi |    |        | H12  | H1 | 0.090  | C5   | CA | 0.173  | O4   | O  | -0.810 |
| O1   | OH | -0.701 | H13  | H1 | 0.090  | N3   | NH | -0.055 | C25  | CT | -0.027 |
| H10  | HO | 0.429  |      |    |        | C8   | CT | -0.206 | H17  | HC | 0.003  |

## Local Minimum Conformation

|      |    |        |      |    |        |      |    |        |      |    |        |
|------|----|--------|------|----|--------|------|----|--------|------|----|--------|
| H18  | HC | 0.003  | C1   | CT | -0.035 | C6   | CT | -0.008 | H1   | HP | 0.120  |
| C26  | CT | 0.040  | H5   | HC | 0.026  | H8   | H1 | 0.110  | H2   | HP | 0.120  |
| H19  | HC | -0.075 | H6   | HC | 0.026  | H9   | H1 | 0.110  | H3   | HP | 0.120  |
| H20  | HC | -0.075 | C6   | CT | -0.033 | C7   | CT | 0.131  | N1   | N3 | -0.040 |
| C27  | C  | 0.783  | H14  | HC | 0.025  | H10  | H1 | 0.057  | H4   | H  | 0.277  |
| O6   | O  | -0.824 | H15  | HC | 0.025  | H11  | H1 | 0.057  | H16  | H  | 0.277  |
| O5   | O  | -0.824 | C5   | CT | -0.035 | O1   | OS | -0.264 | C2   | CT | 0.008  |
|      |    |        | H12  | HC | 0.026  | C8   | CA | 0.016  | H5   | HP | 0.087  |
|      |    |        | H13  | HC | 0.026  | C13  | CA | -0.075 | H6   | HP | 0.087  |
|      |    |        | C4   | CT | -0.003 | C12  | CA | -0.017 | C3   | CT | -0.008 |
| 1thl |    |        | H10  | HC | 0.026  | C11  | CA | -0.205 | H7   | H1 | 0.109  |
| C9   | CA | -0.140 | H11  | HC | 0.026  | H13  | HA | 0.176  | H8   | H1 | 0.109  |
| C8   | CA | -0.205 | C3   | CT | -0.036 | C14  | CT | -0.147 | N2   | NT | -0.674 |
| C6   | CA | -0.099 | H9   | H1 | 0.153  | H15  | HC | 0.072  | H9   | H  | 0.409  |
| H7   | HA | 0.119  | S1   | S6 | 0.683  | H16  | HC | 0.072  | S1   | SY | 0.754  |
| H9   | HA | 0.124  | O1   | O  | -0.479 | H17  | HC | 0.072  | O1   | O  | -0.441 |
| H10  | HA | 0.102  | O2   | O  | -0.479 | H14  | HA | 0.116  | O2   | O  | -0.441 |
| C7   | CA | -0.205 | N1   | NT | -0.550 | C9   | CA | -0.043 | C4   | CA | 0.013  |
| H8   | HA | 0.124  | H1   | H  | 0.389  | H12  | HA | 0.149  | C5   | CA | -0.038 |
| C5   | CA | -0.099 | C7   | CT | 0.003  | C10  | CA | 0.103  | H10  | HA | 0.137  |
| H6   | HA | 0.119  | H16  | H1 | 0.101  | N3   | NH | -0.571 | C6   | CA | -0.166 |
| C4   | CA | 0.025  | H17  | H1 | 0.101  | H3   | H  | 0.375  | H11  | HA | 0.172  |
| C3   | CT | 0.022  | C8   | C  | 0.465  | S1   | SY | 0.817  | C7   | CA | -0.200 |
| H4   | HC | 0.011  | O3   | O  | -0.552 | O2   | O  | -0.497 | H12  | HA | 0.193  |
| H5   | HC | 0.011  | N2   | N  | -0.328 | O3   | O  | -0.497 | C8   | CA | 0.015  |
| C2   | CT | -0.038 | H2   | H  | 0.287  | C15  | CA | 0.014  | C9   | CA | 0.259  |
| H2   | HC | -0.012 | C9   | CT | 0.068  | C16  | CA | -0.096 | H13  | H4 | 0.093  |
| H3   | HC | -0.012 | C17  | C  | 0.467  | H18  | HA | 0.153  | N3   | NC | -0.526 |
| C1   | CT | 0.071  | O4   | O  | -0.558 | C17  | CA | -0.160 | C10  | CA | 0.269  |
| C10  | C  | 0.720  | N5   | N  | -0.143 | H19  | HA | 0.163  | H14  | H4 | 0.105  |
| O1   | O  | -0.795 | C18  | CT | 0.005  | C18  | CA | -0.075 | C11  | CA | -0.342 |
| O2   | O  | -0.795 | C19  | CT | -0.019 | H20  | HA | 0.155  | H15  | HA | 0.161  |
| H1   | HC | -0.020 | C20  | CT | -0.026 | C19  | CA | -0.160 | C12  | CA | 0.135  |
| C11  | CT | 0.231  | C21  | CT | -0.019 | H21  | HA | 0.163  |      |    |        |
| H11  | HC | -0.101 | C22  | CT | 0.005  | C20  | CA | -0.096 |      |    |        |
| H12  | HC | -0.101 | H35  | H1 | 0.052  | H22  | HA | 0.153  |      |    |        |
| C12  | CT | 0.174  | H36  | H1 | 0.052  |      |    |        | 1ydt |    |        |
| C13  | CT | 0.016  | H33  | HC | 0.020  |      |    |        | C2   | CA | 0.121  |
| C15  | CT | 0.006  | H34  | HC | 0.020  |      |    |        | C1   | CA | -0.366 |
| C16  | CT | 0.006  | H31  | HC | 0.025  | 1ydr |    |        | H1   | HA | 0.172  |
| C14  | CT | 0.016  | H32  | HC | 0.025  | C2   | CA | 0.099  | C3   | CA | 0.290  |
| H15  | HC | -0.028 | H29  | HC | 0.020  | C1   | CA | -0.359 | H2   | H4 | 0.097  |
| H16  | HC | -0.028 | H30  | HC | 0.020  | H1   | HA | 0.161  | N1   | NC | -0.539 |
| H19  | HC | -0.022 | H27  | H1 | 0.052  | C3   | CA | 0.299  | C4   | CA | 0.284  |
| H20  | HC | -0.022 | H28  | H1 | 0.052  | H2   | H4 | 0.085  | H3   | H4 | 0.083  |
| H17  | HC | -0.022 | H18  | H1 | 0.032  | N1   | NC | -0.548 | C5   | CA | 0.013  |
| H18  | HC | -0.022 | C10  | CT | -0.100 | C4   | CA | 0.263  | C6   | CA | -0.214 |
| H13  | HC | -0.028 | H19  | HC | 0.079  | H3   | H4 | 0.086  | H4   | HA | 0.195  |
| H14  | HC | -0.028 | H20  | HC | 0.079  | C5   | CA | 0.053  | C7   | CA | -0.165 |
| C17  | C  | 0.328  | C11  | CT | -0.050 | C6   | CA | -0.228 | H5   | HA | 0.175  |
| O3   | O  | -0.545 | H21  | H1 | 0.119  | H4   | HA | 0.192  | C8   | CA | -0.048 |
| N1   | N  | -0.297 | H22  | H1 | 0.119  | C7   | CA | -0.149 | H6   | HA | 0.132  |
| H21  | H  | 0.262  | N3   | NH | -0.444 | H5   | HA | 0.169  | C9   | CA | 0.034  |
| C18  | CT | -0.132 | H3   | H  | 0.337  | C8   | CA | -0.034 | S1   | SY | 0.794  |
| C19  | C  | 0.713  | C12  | CA | 0.317  | H6   | HA | 0.152  | O1   | O  | -0.462 |
| O4   | O  | -0.725 | C13  | CA | -0.162 | C9   | CA | -0.063 | O2   | O  | -0.462 |
| O5   | O  | -0.725 | H23  | HA | 0.159  | S1   | SY | 0.949  | N2   | NT | -0.637 |
| H22  | H1 | 0.094  | C14  | CA | -0.069 | O1   | O  | -0.490 | H7   | H  | 0.389  |
| C20  | CT | -0.124 | H24  | H4 | 0.214  | O2   | O  | -0.490 | C10  | CT | 0.019  |
| H23  | HC | 0.083  | N4   | NA | -0.123 | N2   | NT | -0.412 | H8   | H1 | 0.090  |
| H24  | HC | 0.083  | H4   | H  | 0.326  | C10  | CT | 0.049  | H9   | H1 | 0.090  |
| C21  | C* | -0.042 | C15  | CA | -0.069 | C11  | CT | 0.026  | C11  | CT | 0.074  |
| C22  | CW | -0.101 | H25  | H4 | 0.214  | H7   | HC | 0.026  | H10  | HP | 0.061  |
| H25  | H4 | 0.188  | C16  | CA | -0.162 | H8   | HC | 0.026  | H11  | HP | 0.061  |
| N2   | NA | -0.389 | H26  | HA | 0.159  | H9   | HC | 0.026  | N3   | N3 | -0.132 |
| H26  | H  | 0.345  |      |    |        | H10  | H1 | 0.088  | H12  | H  | 0.280  |
| C24  | CN | 0.077  | 1uvt |    |        | C12  | CT | -0.059 | H21  | H  | 0.280  |
| C23  | CB | 0.089  | C2   | CA | -0.146 | H11  | HP | 0.110  | C12  | CT | -0.007 |
| C25  | CA | -0.141 | H5   | HA | 0.141  | H12  | HP | 0.110  | H13  | HP | 0.105  |
| H27  | HA | 0.124  | C1   | CA | -0.045 | N3   | N3 | -0.140 | H14  | HP | 0.105  |
| C27  | CA | -0.240 | H4   | H4 | 0.207  | H13  | H  | 0.284  | C13  | CM | -0.221 |
| H29  | HA | 0.130  | N1   | NA | -0.123 | H18  | H  | 0.284  | H15  | HA | 0.153  |
| C28  | CA | -0.161 | H1   | H  | 0.328  | C13  | CT | -0.053 | C14  | CM | -0.106 |
| H30  | HA | 0.118  | C5   | CA | -0.045 | H14  | HP | 0.107  | H16  | HA | 0.163  |
| C26  | CA | -0.216 | H7   | H4 | 0.207  | H15  | HP | 0.107  | C15  | CA | 0.001  |
| H28  | HA | 0.128  | C4   | CA | -0.146 | C14  | CT | 0.052  | C16  | CA | -0.112 |
|      |    |        | H6   | HA | 0.141  | H16  | H1 | 0.109  | H17  | HA | 0.131  |
| 1uvs |    |        | C3   | CA | 0.310  | H17  | H1 | 0.109  | C17  | CA | -0.054 |
| C2   | CT | -0.003 | N2   | NH | -0.521 |      |    |        | H18  | HA | 0.141  |
| H7   | HC | 0.026  | H2   | H  | 0.368  | 1yds |    |        | C18  | CA | -0.090 |
| H8   | HC | 0.026  |      |    |        | C1   | CT | -0.152 | Br1  | Br | -0.025 |
|      |    |        |      |    |        |      |    |        | C19  | CA | -0.054 |





## Local Minimum Conformation

|      |    |        |      |    |        |      |    |        |     |    |        |
|------|----|--------|------|----|--------|------|----|--------|-----|----|--------|
| H4   | H4 | 0.108  | C6   | CT | 0.108  | C2   | CA | -0.016 | C2  | CA | -0.176 |
| C6   | CA | 0.089  | C7   | CT | -0.047 | C1   | CI | -0.132 | H2  | HA | 0.138  |
| C7   | CT | 0.004  | H6   | HC | 0.010  | C1   | CA | -0.098 | C3  | CA | -0.159 |
| H5   | H1 | 0.086  | H7   | HC | 0.010  | H12  | HA | 0.155  | H3  | HA | 0.123  |
| H6   | H1 | 0.086  | H8   | HC | 0.010  | C6   | CA | -0.193 | C4  | CA | -0.176 |
| N6   | NH | -0.644 | C8   | CT | -0.047 | H15  | HA | 0.152  | H4  | HA | 0.138  |
| H7   | H  | 0.362  | H9   | HC | 0.010  | C5   | CA | 0.272  | C5  | CA | -0.198 |
| C8   | CA | 0.099  | H10  | HC | 0.010  | O1   | OS | -0.355 | H5  | HA | 0.119  |
| C11  | CA | -0.152 | H11  | HC | 0.010  | C7   | CA | 0.259  | C6  | CA | 0.442  |
| H10  | HA | 0.148  | H5   | HC | 0.010  | C12  | CA | -0.159 | O1  | OS | -0.572 |
| C12  | CA | -0.141 | H3   | HC | 0.066  | C11  | CA | -0.163 | C7  | CA | 0.605  |
| H11  | HA | 0.143  | H4   | HC | 0.066  | H17  | HA | 0.178  | C10 | CA | -0.317 |
| C9   | CA | -0.152 | H2   | H1 | 0.106  | H18  | HA | 0.146  | H8  | HA | 0.179  |
| H8   | HA | 0.148  | C4   | C  | 0.268  | C8   | CA | -0.159 | C11 | CA | -0.151 |
| C10  | CA | -0.141 | O2   | O  | -0.448 | H16  | HA | 0.146  | H9  | HA | 0.178  |
| H9   | HA | 0.143  | N2   | N  | -0.195 | C9   | CA | -0.163 | C8  | CA | -0.317 |
| C13  | CA | 0.062  | H12  | H  | 0.238  | H19  | HA | 0.178  | H7  | HA | 0.179  |
| C14  | C  | 0.353  | C9   | CT | 0.089  | C10  | CA | -0.030 | C9  | CA | -0.151 |
| O2   | O  | -0.577 | C11  | CT | -0.184 | S1   | SY | 0.985  | H6  | HA | 0.178  |
| N7   | N  | -0.107 | H14  | HC | 0.064  | O2   | O  | -0.599 | C12 | CA | 0.023  |
| H12  | H  | 0.164  | H15  | HC | 0.064  | O3   | O  | -0.599 | S1  | SY | 0.765  |
| C15  | CT | 0.018  | H16  | HC | 0.064  | C13  | CT | -0.018 | O2  | O  | -0.569 |
| C16  | C  | 0.726  | H13  | H1 | 0.080  | H1   | H1 | 0.014  | O3  | O  | -0.569 |
| O3   | O  | -0.772 | C10  | C  | 0.445  | H2   | H1 | 0.014  | C13 | CT | 0.183  |
| O4   | O  | -0.772 | O3   | O  | -0.507 | C14  | CT | 0.042  | C14 | CT | -0.281 |
| H13  | H1 | 0.037  | N3   | N  | -0.177 | C19  | C  | 0.549  | C15 | C  | 0.655  |
| C17  | CT | 0.109  | H17  | H  | 0.116  | N1   | N  | -0.232 | O4  | O  | -0.614 |
| H14  | HC | -0.012 | C12  | CA | 0.075  | O6   | OH | -0.713 | N1  | N  | -0.510 |
| H15  | HC | -0.012 | C13  | CA | -0.132 | H11  | H  | 0.280  | O5  | OH | -0.510 |
| C18  | CT | -0.332 | H18  | HA | 0.167  | O5   | O  | -0.665 | H10 | H  | 0.326  |
| H16  | HC | 0.083  | C14  | CA | -0.194 | C15  | CT | -0.068 | H11 | HC | 0.057  |
| H17  | HC | 0.083  | H19  | HA | 0.164  | H3   | HC | 0.029  | H12 | HC | 0.057  |
| C19  | C  | 0.740  | C15  | CA | -0.022 | H4   | HC | 0.029  | C16 | CT | 0.030  |
| O6   | O  | -0.706 | C18  | CT | 0.606  | C16  | CT | 0.159  | H13 | HC | 0.011  |
| O5   | O  | -0.706 | F4   | F  | -0.212 | H5   | H1 | 0.011  | H14 | HC | 0.011  |
|      |    |        | F5   | F  | -0.212 | H6   | H1 | 0.011  | C17 | CT | 0.088  |
|      |    |        | F6   | F  | -0.212 | O4   | OS | -0.436 | H15 | H1 | 0.037  |
|      |    |        | C16  | CA | -0.194 | C17  | CT | 0.159  | H16 | H1 | 0.037  |
| 7est |    |        | H20  | HA | 0.164  | H7   | H1 | 0.011  | O6  | OS | -0.428 |
| F1   | F  | -0.145 | C17  | CA | -0.132 | H8   | H1 | 0.011  | C18 | CT | 0.088  |
| C2   | CT | 0.392  | H21  | HA | 0.167  | C18  | CT | -0.068 | H17 | H1 | 0.037  |
| F2   | F  | -0.145 |      |    |        | H9   | HC | 0.029  | H18 | H1 | 0.037  |
| F3   | F  | -0.145 |      |    |        | H10  | HC | 0.029  | C19 | CT | 0.030  |
| C1   | C  | 0.436  |      |    |        |      |    |        | H19 | HC | 0.011  |
| O1   | O  | -0.495 | 830c |    |        |      |    |        | H20 | HC | 0.011  |
| N1   | N  | -0.274 | C4   | CA | -0.193 |      |    |        |     |    |        |
| H1   | H  | 0.242  | H14  | HA | 0.152  | 966c |    |        |     |    |        |
| C3   | CT | 0.015  | C3   | CA | -0.098 | C1   | CA | -0.198 |     |    |        |
| C5   | CT | -0.152 | H13  | HA | 0.155  | H1   | HA | 0.119  |     |    |        |
